# Supplementary material for: Bisstibane–distibane conversionviaconsecutive single-electron oxidation and reduction reaction
Source: Royal Society of Chemistry journal article supplement (doi:10.1039/d2cc01986h), 2022-01-01
Supplement: d2cc01986h1.pdf [file d2cc01986h1.pdf]

## - Supporting Information –

### **Bisstibane–Distibane conversion via consecutive single-electron oxidation and reduction reaction**

Alexander Gehlhaar,<sup>a</sup> Hanns Micha Weinert,<sup>a</sup> Christoph Wölper,<sup>a</sup> Nina Semleit,<sup>b</sup> Gebhard  
Haberhauer,<sup>\*b</sup> Stephan Schulz<sup>\*a,c</sup>

<sup>a</sup> *Institute for Inorganic Chemistry, University of Duisburg-Essen, Universitätsstraße 5-7, D-45117  
Essen, Germany.*

<sup>b</sup> *Institute for Organic Chemistry Duisburg-Essen, University of Duisburg-Essen, Universitätsstraße 5-7,  
D-45117 Essen, Germany*

<sup>c</sup> *Center for Nanointegration Duisburg-Essen (Cenide), University of Duisburg-Essen, Carl-Benz-Straße  
199, 47057 Duisburg, Germany*

## Table of Contents

### I. Experimental Details

**Figures S1-5.**  $^1\text{H}$ ,  $^{13}\text{C}\{^1\text{H}\}$  NMR and IR spectra of  $(\text{Trip}_2\text{Sb})_2\text{Naph}$  (**1**).

**Figures S6-8.**  $^1\text{H}$ ,  $^{13}\text{C}\{^1\text{H}\}$  NMR and IR spectra of  $(\text{Trip}_2\text{Bi})_2\text{Naph}$  (**2**).

**Figures S9-14.**  $^1\text{H}$ ,  $^{11}\text{B}$ ,  $^{13}\text{C}\{^1\text{H}\}$ ,  $^{19}\text{F}$  NMR and IR spectra of  $[(\text{Trip}_2\text{Sb})(\text{TripSb})\text{Naph}][\text{Bar}^{\text{F}}]$  (**3**).

**Figures S15-17.**  $^1\text{H}$ ,  $^{13}\text{C}\{^1\text{H}\}$  NMR and IR spectra of  $(\text{TripSb})_2\text{Naph}$  (**4**).

**Figures S18-20.** VT  $^1\text{H}$  NMR spectra of **1-3**.

**Figures S21-24.** CV data of **1** and **2**.

### II. Crystallographic Details

**Table S1.** Single crystal X-ray diffraction data of **1-4**.

**Figure S25.** Solid-state structure of **1**. Displacement ellipsoids drawn at 50 % probability levels. The H atoms are omitted for clarity.

**Tables S2,3.** Bond lengths [ $\text{\AA}$ ] and angles [ $^\circ$ ] of **1**.

**Figure S26.** Solid-state structure of **2**. Displacement ellipsoids are drawn at a 50 % probability level. The H atoms are omitted for clarity.

**Tables S4,5.** Bond lengths [ $\text{\AA}$ ] and angles [ $^\circ$ ] of **2**.

**Figure S27.** Solid-state structure of **3**. Displacement ellipsoids drawn at 50 % probability levels. The hydrogen atoms are omitted for clarity.

**Tables S6,7.** Bond lengths [ $\text{\AA}$ ] and angles [ $^\circ$ ] of **3**.

**Figure S28.** Solid-state structure of **4**. Displacement ellipsoids are drawn at a 50 % probability levels.

**Tables S8,9.** Bond lengths [ $\text{\AA}$ ] and angles [ $^\circ$ ] of **4**.

**Figure S29.** Observed intramolecular CH- $\pi$  contacts in **1** (A), **2** (B) and **3** (C).

### III. Computational Details

**Figure S30.** Selected orbitals of **1** (left), **3** (middle), and **4** (right) calculated at B3LYP-D3BJ/def2-TZVP level of theory (isovalue 0.03). Hydrogen atoms are omitted for clarity.

**Figure S31.** Selected orbitals of **2** calculated at B3LYP-D3BJ/def2-TZVP level of theory (isovalue 0.03).

**Figure S32.** Selected orbitals of **S1** (left), **S3** (middle), and **S4** (right) calculated at B3LYP-D3BJ/def2-TZVP level of theory (isovalue 0.03).

**Figure S33.** Selected orbitals of **S2** calculated at B3LYP-D3BJ/def2-TZVP level of theory (isovalue 0.03).

**Figure S34.** The percentage contributions of the attractive forces and the total binding energies in **S3-S6**, **3** and **4**.

**Figure S35-37.** Molecular graphs of **S3-S6**, **3** and **4** showing the bond paths as well as the critical points.

**Table 10.** Distances between the bond critical points (BCP) and the Sb atoms in **S3-S6**, **3** and **4**.

**Table S11.** Topological and energetic properties of electron density calculated at the bond critical points of the Sb--Sb interaction for **S3-S6, 3** and **4**.

**Table S12.** Interaction energies between the two Sb atoms in **S3-S6, 3** and **4** derived by IQA.

**Figure S38.** Atomic charges calculated using AIM analysis (B3LYP-D3BJ/TZP).

**Figure S39.** Atomic charges calculated using NBO analysis (B3LYP-D3BJ/def2-TZVP).

#### **IV. Cartesian Coordinates and Absolute Energies for All Calculated Compounds**

**Table S13.** Absolute energies [au] calculated by means B3LYP-D3BJ/def2-TZVP.

#### **V. References**

## I. Experimental Details

**General Considerations.** All manipulations were performed in an atmosphere of purified argon using standard Schlenk and glovebox techniques. Toluene, *n*-hexane and Et<sub>2</sub>O were dried using an mBraun Solvent Purification System (SPS). CH<sub>2</sub>Cl<sub>2</sub> and fluorobenzene were dried over CaH<sub>2</sub>, while THF was carefully dried over NaK. Dried solvents were degassed and stored over appropriate molecular sieves. thf-*d*<sub>8</sub>, C<sub>6</sub>D<sub>6</sub> and CD<sub>2</sub>Cl<sub>2</sub> were dried over activated molecular sieves (4 Å, 3 Å CD<sub>2</sub>Cl<sub>2</sub>) and degassed prior to use. The anhydrous nature of the solvents was verified by Karl Fischer titration. Water was degassed through reflux in an argon atmosphere, followed by distillation. 1,8-Li<sub>2</sub>Naph,<sup>1</sup> Trip<sub>2</sub>SbCl,<sup>2</sup> Trip<sub>2</sub>BiCl,<sup>2</sup> FcBAR<sup>F</sup>,<sup>3</sup> KC<sub>8</sub><sup>4</sup> were prepared according to literature procedures. 1,8-Br<sub>2</sub>Naph, TripBr, Mg, NOSbF<sub>6</sub> and <sup>n</sup>BuLi (2.5 M in hexane) were commercially available and used as received, whereas SbCl<sub>3</sub> and BiCl<sub>3</sub> were purified by sublimation prior to use. Microanalyses were performed at the Elemental Analysis Laboratory of the University of Duisburg-Essen. Melting points were measured using a Thermo Scientific 9300 apparatus. NMR spectra were recorded using a Bruker Avance Neo 400 (<sup>1</sup>H: 400.1 MHz; <sup>11</sup>B = 128.4 MHz; <sup>13</sup>C{<sup>1</sup>H}: 150.9 MHz, <sup>19</sup>F: 376.5 MHz) or Bruker DMX300 (<sup>1</sup>H: 300.1 MHz; <sup>13</sup>C{<sup>1</sup>H}: 150.9 MHz) spectrometer, and the spectra were referenced to internal CDHCl<sub>2</sub> (<sup>1</sup>H: δ = 5.32 ppm), C<sub>6</sub>D<sub>5</sub>H (<sup>1</sup>H: δ = 7.16 ppm), C<sub>7</sub>D<sub>7</sub>H (<sup>1</sup>H: δ = 2.08 ppm, <sup>13</sup>C: δ = 20.43 ppm) or C<sub>4</sub>D<sub>7</sub>HO (<sup>1</sup>H: δ = 1.72 ppm; <sup>13</sup>C: δ = 25.31 ppm). IR spectra were recorded with an ALPHA-T FT-IR spectrometer equipped with a single reflection ATR sampling module in a glovebox to guarantee measurements under inert gas conditions. CV studies were performed in a glovebox using a Metrohm Autolab PGSTAT 204 potentiostat with a three-electrode setup consisting of a Pt-disk (*d* = 1 mm) working electrode, a Pt-wire counter electrode, and an Ag-wire pseudoreference electrode; and ferrocene was used as an internal standard. For **5**, the ferrocene redox couple was obscured; hence, decamethylferrocene was used as the internal reference (440 mV vs Fc in THF/0.1 M NBu<sub>4</sub>PF<sub>6</sub>).<sup>5</sup>

**Synthesis of (Trip<sub>2</sub>Sb)<sub>2</sub>Naph (1).** Li<sub>2</sub>Naph (2 mmol, 369.8 mg) and Trip<sub>2</sub>SbCl (4 mmol, 2.29 g) were each dissolved in 20 mL of thf. The solutions were cooled to -78 °C, combined and stirred for 12 h. All volatiles were removed *in vacuo* and 20 mL of degassed water was added. The resulting mixture was stirred for 30 minutes, filtered and the residue dried *in vacuo*. Washing with ethanol (2 x 15 mL) and drying *in vacuo* gave **1** as a yellow powder.

**Yield:** 1.565 g (65 %); **m.p.:** 265.8 °C; **elemental analysis [wt-%]:** calcd. for C<sub>70</sub>H<sub>98</sub>Sb<sub>2</sub>: C 71.1, H 8.35. found: C 70.7, H 8.43; **<sup>1</sup>H NMR (400.1 MHz, 297 K, CD<sub>2</sub>Cl<sub>2</sub>): δ [ppm]** 8.16 (dd, <sup>3</sup>J<sub>HH</sub> = 6.95 Hz, <sup>4</sup>J<sub>HH</sub> = 1.07 Hz, 2 H, Naph-2,7-*H*), 7.86 (dd, <sup>3</sup>J<sub>HH</sub> = 8.15 Hz, <sup>4</sup>J<sub>HH</sub> = 1.26 Hz, 2 H, Naph-4,5-*H*), 7.31 (dd, <sup>3</sup>J<sub>HH</sub> = 7.96 Hz, <sup>3</sup>J<sub>HH</sub> = 7.04 Hz, 2 H, Naph-3,6-*H*), 6.91 (s (br), 8 H, Ph-*m-H*), 3.70 (s (br), 2 H, *o*-CH(CH<sub>3</sub>)<sub>2</sub>), 3.41 (s (br), 2 H, *o*-CH(CH<sub>3</sub>)<sub>2</sub>), 2.80 (s (br), 6 H, *o/p*-CH(CH<sub>3</sub>)<sub>2</sub>), 2.53 (s (br), 2 H, *o*-CH(CH<sub>3</sub>)<sub>2</sub>), 1.19 (d, <sup>3</sup>J<sub>HH</sub> = 6.61 Hz, 36 H, *o/p*-CH(CH<sub>3</sub>)<sub>2</sub>), 0.96 (s (br), 12 H, *o*-CH(CH<sub>3</sub>)<sub>2</sub>), 0.45 (s (br), 12 H, *o*-CH(CH<sub>3</sub>)<sub>2</sub>), 0.19 (s (br), 12 H, *o*-

CH(CH<sub>3</sub>)<sub>2</sub>); <sup>13</sup>C{<sup>1</sup>H} NMR (100.6 MHz, 297 K, CD<sub>2</sub>Cl<sub>2</sub>): δ [ppm] 156.27 (br), 154.96 (br), 150.41 (br), 148.85 (br), 143.53, 143.30, 139.59 (Naph-2,7-CH), 137.26 (br), 136.94, 130.81 (Naph-4,5-CH), 125.12 (Naph-3,6-CH), 123.21 (br, Ph-*m*-CH), 122.22 (br, Ph-*m*-CH), 37.97 (br), 36.59 (br, *o*-CH(CH<sub>3</sub>)<sub>2</sub>), 34.93 (br, *o*-CH(CH<sub>3</sub>)<sub>2</sub>), 34.55 (*o/p*-CH(CH<sub>3</sub>)<sub>2</sub>), 26.05 (br, *o*-CH(CH<sub>3</sub>)<sub>2</sub>), 25.00 (br), 24.66 (br, *o*-CH(CH<sub>3</sub>)<sub>2</sub>), 24.22 (*o/p*-CH(CH<sub>3</sub>)<sub>2</sub>), 24.16 (*o*-CH(CH<sub>3</sub>)<sub>2</sub>), 23.21 (br, *o*-CH(CH<sub>3</sub>)<sub>2</sub>); <sup>1</sup>H NMR (300.1 MHz, 232 K, CD<sub>2</sub>Cl<sub>2</sub>): δ [ppm] 8.08 (d, <sup>3</sup>J<sub>HH</sub> = 6.78 Hz, 2 H, Naph-2,7-*H*), 7.84 (d, <sup>3</sup>J<sub>HH</sub> = 7.63 Hz, 2 H, Naph-4,5-*H*), 7.29 (t, <sup>3</sup>J<sub>HH</sub> = 7.38 Hz, 2 H, Naph-3,6-*H*), 6.98 (s, 2 H, Ph<sup>1</sup>-*m*-*H*), 6.93 (s, 2 H, Ph<sup>1</sup>-*m*-*H*), 6.79 (s, 2 H, Ph<sup>2</sup>-*m*-*H*), 6.76 (s, 2 H, Ph<sup>2</sup>-*m*-*H*), 3.63 (sept, <sup>3</sup>J<sub>HH</sub> = 6.55 Hz, 2 H, Ph<sup>1</sup>-*o*-CH(CH<sub>3</sub>)<sub>2</sub>), 3.31 (sept, <sup>3</sup>J<sub>HH</sub> = 6.24 Hz, 2 H, Ph<sup>2</sup>-*o*-CH(CH<sub>3</sub>)<sub>2</sub>), 2.85-2.65 (m, 6 H, Ph-*o/p*-CH(CH<sub>3</sub>)<sub>2</sub>), 2.48 (sept, <sup>3</sup>J<sub>HH</sub> = 6.55 Hz, 2 H, Ph<sup>2</sup>-*o*-CH(CH<sub>3</sub>)<sub>2</sub>), 1.16-1.10 (m, 36 H, Ph-*o/p*-CH(CH<sub>3</sub>)<sub>2</sub>), 0.92-0.89 (m, 12 H, Ph<sup>1</sup>-*o*-CH(CH<sub>3</sub>)<sub>2</sub>), 0.38 (d, <sup>3</sup>J<sub>HH</sub> = 6.69 Hz, 6 H, Ph<sup>2</sup>-*o*-CH(CH<sub>3</sub>)<sub>2</sub>), 0.31 (d, <sup>3</sup>J<sub>HH</sub> = 6.23 Hz, 6 H, Ph<sup>2</sup>-*o*-CH(CH<sub>3</sub>)<sub>2</sub>), 0.20 (d, <sup>3</sup>J<sub>HH</sub> = 6.46 Hz, 6 H, Ph<sup>2</sup>-*o*-CH(CH<sub>3</sub>)<sub>2</sub>), 0.02 (d, <sup>3</sup>J<sub>HH</sub> = 6.23 Hz, 6 H, Ph<sup>1</sup>-*o*-CH(CH<sub>3</sub>)<sub>2</sub>); <sup>13</sup>C{<sup>1</sup>H} NMR (75.5 MHz, 232 K, CD<sub>2</sub>Cl<sub>2</sub>): δ [ppm] 155.55 (Ph<sup>1</sup>-*o*-C), 155.11 (Ph<sup>2</sup>-*o*-C), 154.13 (Ph<sup>1</sup>-*o*-C), 153.31 (Ph<sup>2</sup>-*o*-C), 149.83 (Ph-*p*-C), 148.03 (Ph-*p*-C), 142.66 (Naph-1,8-C), 142.27 (Naph-9-C), 142.23 (Ph<sup>1</sup>-*ipso*-C), 138.80 (Naph-2,7-CH), 136.40 (Ph<sup>2</sup>-*ipso*-C), 136.07 (Naph-10-C), 130.27 (Naph-4,5-CH), 124.55 (Naph-3,6-CH), 122.98 (Ph<sup>1</sup>-*m*-CH), 122.34 (Ph<sup>1</sup>-*m*-CH), 121.82 (Ph<sup>2</sup>-*m*-CH), 121.17 (Ph<sup>2</sup>-*m*-CH), 37.62 (Ph<sup>1</sup>-*o*-CH(CH<sub>3</sub>)<sub>2</sub>), 36.29 (Ph<sup>2</sup>-*o*-CH(CH<sub>3</sub>)<sub>2</sub>), 36.01 (Ph<sup>2</sup>-*o*-CH(CH<sub>3</sub>)<sub>2</sub>), 34.34 (Ph<sup>2</sup>-*o*-CH(CH<sub>3</sub>)<sub>2</sub>), 34.09 (Ph<sup>1</sup>-*p*-CH(CH<sub>3</sub>)<sub>2</sub>), 33.95 (Ph<sup>2</sup>-*p*-CH(CH<sub>3</sub>)<sub>2</sub>), 25.67 (Ph<sup>2</sup>-*o*-CH(CH<sub>3</sub>)<sub>2</sub>), 25.40 (Ph<sup>1</sup>-*o*-CH(CH<sub>3</sub>)<sub>2</sub>), 24.50 (Ph<sup>1</sup>-*o*-CH(CH<sub>3</sub>)<sub>2</sub>), 24.00 (Ph<sup>1</sup>-*o*-CH(CH<sub>3</sub>)<sub>2</sub>), 23.96 (Ph-*p*-CH(CH<sub>3</sub>)<sub>2</sub>), 23.81 (Ph-*p*-CH(CH<sub>3</sub>)<sub>2</sub>), 23.75 (Ph<sup>2</sup>-*o*-CH(CH<sub>3</sub>)<sub>2</sub>), 22.72 (Ph<sup>2</sup>-*o*-CH(CH<sub>3</sub>)<sub>2</sub>), 22.31 (Ph<sup>1</sup>-*o*-CH(CH<sub>3</sub>)<sub>2</sub>), 22.26 (Ph<sup>2</sup>-*o*-CH(CH<sub>3</sub>)<sub>2</sub>); IR ν [cm<sup>-1</sup>]: 3033 (w), 2954 (s), 2923 (m), 2864 (m), 1594 (w), 1553 (w), 1535 (w), 1459 (m), 1415 (m), 1380 (m), 1360 (m), 1306 (w), 1258 (m), 1231 (w), 1191 (w), 1155 (w), 1129 (w), 1099 (m), 1066 (m), 1051 (m), 1007 (w), 935 (w), 876 (s), 816 (m), 773 (m), 744 (m), 668 (w), 643 (w), 629 (w), 613 (w), 563 (w), 511 (m), 470 (w), 450 (w), 433 (w), 395 (m).

**Synthesis of (Trip<sub>2</sub>Bi)<sub>2</sub>Naph (2).** Li<sub>2</sub>Naph (1.99 mmol, 362 mg) and Trip<sub>2</sub>BiCl (2.00 mmol, 1.3 g) were each dissolved in 20 mL of thf and the resulting solutions cooled to -30 °C. The yellow solution of Trip<sub>2</sub>BiCl was added to Li<sub>2</sub>Naph and stirred overnight. The reaction mixture was dried *in vacuo* and 25 mL of water were added, stirred for 30 minutes, filtered and the residue dried *in vacuo*. The solid was extracted with toluene and the resulting solution concentrated to 2 mL. Ethanol (10 mL) was added, yielding a precipitate that was dissolved in upon heating. Storage of the solution at +4 °C gave yellow crystals of **2**.

**Yield:** 754.8 mg (56 %); **m.p.:** 249.6 °C (dec.); **elemental analysis [wt-%]:** calcd. for C<sub>70</sub>H<sub>98</sub>Bi<sub>2</sub>: C 61.93, H 7.28. found: C 62.0, H 7.22; <sup>1</sup>H NMR (400.1 MHz, 297 K, CD<sub>2</sub>Cl<sub>2</sub>): δ [ppm] 8.87 (dd, <sup>3</sup>J<sub>HH</sub> = 6.88 Hz, <sup>4</sup>J<sub>HH</sub> = 0.96 Hz, 2 H, Naph-2,7-*CH*), 7.88 (dd, <sup>3</sup>J<sub>HH</sub> = 7.96 Hz, <sup>4</sup>J<sub>HH</sub> = 0.93 Hz, 2 H, Naph-4,5-*CH*), 7.27 (t, <sup>3</sup>J<sub>HH</sub> = 7.41 Hz, 2 H, Naph-3,6-*CH*), 7.07 (s, 8 H, Ph-*m*-*H*), 2.93 (sept, <sup>3</sup>J<sub>HH</sub> = 6.45 Hz, 8 H, *o*-CH(CH<sub>3</sub>)<sub>2</sub>), 2.80 (sept, <sup>3</sup>J<sub>HH</sub> = 6.94 Hz, 4 H, *p*-CH(CH<sub>3</sub>)<sub>2</sub>), 1.20 (d, <sup>3</sup>J<sub>HH</sub> = 7.01 Hz, 24 H, *p*-CH(CH<sub>3</sub>)<sub>2</sub>), 0.81 (d, <sup>3</sup>J<sub>HH</sub> = 6.42 Hz, 24 H,

*o*-CH(CH<sub>3</sub>)<sub>2</sub>, 0.70 (d, <sup>3</sup>J<sub>HH</sub> = 4.67 Hz, 24 H, *o*-CH(CH<sub>3</sub>)<sub>2</sub>); <sup>13</sup>C{<sup>1</sup>H} NMR (100.6 MHz, 297 K, CD<sub>2</sub>Cl<sub>2</sub>): δ [ppm] 160.75 (Naph-*ipso*-C), 156.17 (Trip-*ipso*/*o*-C), 149.12 (Trip-*p*-C), 145.71 (Naph-10-C), 143.89 (Naph-2,7-CH), 139.26 (Naph-9-C), 129.98 (Naph-4,5-CH), 127.71 (Naph-3,6-CH), 123.67 (Ph-*m*-CH), 39.30 (*o*-CH(CH<sub>3</sub>)<sub>2</sub>), 34.60 (*p*-CH(CH<sub>3</sub>)<sub>2</sub>), 25.12 (*o*-CH(CH<sub>3</sub>)<sub>2</sub>), 24.42 (*o*-CH(CH<sub>3</sub>)<sub>2</sub>), 24.21 (*p*-CH(CH<sub>3</sub>)<sub>2</sub>), 24.14 (*p*-CH(CH<sub>3</sub>)<sub>2</sub>); IR ν [cm<sup>-1</sup>]: 3015 (w), 2947 (s), 2914 (m), 2890 (m), 2855 (m), 1582 (w), 1549 (w), 1523 (w), 1453 (m), 1408 (m), 1375 (m), 1355 (m), 1302 (w), 1254 (w), 1226 (w), 1187 (w), 1152 (w), 1126 (w), 1093 (m), 1048 (m), 990 (m), 935 (w), 872 (m), 833 (w), 806 (m), 764 (m), 734 (m), 640 (w), 550 (w), 550 (w), 507 (w), 471 (w), 448 (w).

**Synthesis of [(Trip<sub>2</sub>Sb)(TripSb)Naph][BAR<sup>F</sup>] (3).** **1** (0.8 mmol, 1 g) and [Fc<sup>+</sup>][BAR<sup>F</sup>] (0.8 mmol, 723 mg) were each dissolved in 30 mL of thf. The solutions were cooled to -78 °C and the solution of [Fc<sup>+</sup>][BAR<sup>F</sup>] was added to **1**, yielding a deep purple reaction mixture, which was stirred for 12 h. Removal of all volatiles *in vacuo* gave an oily residue, that was washed with *n*-hexane until the hexane solution stayed colorless. Additional 50 mL of *n*-hexane were added, the resulting mixture stirred at 60 °C for 12 h and then filtered. Drying the solid residue *in vacuo* gave **3** as a green powder. Crystals suitable for single crystal X-ray diffraction were obtained by dissolving 100 mg of **3** in 2 mL of DCM, which was layered with 30 mL of *n*-hexane. Storage for a week at +4 °C resulted in the formation of green blocks of **3**.

**Yield:** 1.325 g (84 %); **m.p.:** 106.0 °C; **elemental analysis [wt-%]:** calcd. for C<sub>79</sub>H<sub>75</sub>BF<sub>20</sub>Sb<sub>2</sub>: C 57.21, H 4.56. found: C 56.5, H 4.22; <sup>1</sup>H NMR (400.1 MHz, 297 K, CD<sub>2</sub>Cl<sub>2</sub>): δ [ppm] 8.21 (d, <sup>3</sup>J<sub>HH</sub> = 8.43 Hz, 1 H, Naph-*H*), 8.11-8.06 (m, 3 H, Naph-*H*), 7.77 (dd, <sup>3</sup>J<sub>HH</sub> = 8.05 Hz, <sup>3</sup>J<sub>HH</sub> = 7.21 Hz, 1 H, Naph-*m*-*H*), 7.70 (dd, <sup>3</sup>J<sub>HH</sub> = 8.26 Hz, <sup>3</sup>J<sub>HH</sub> = 6.95 Hz, 1 H, Naph-*m*-*CH*), 7.17 (s, 2 H, Ph-*m*-*H*), 7.09 (s (br), 2 H, Ph-*m*-*H*), 7.06 (s, 2 H, Ph-*m*-*H*), 3.82 (s (br), 1 H, *o*-CH(CH<sub>3</sub>)<sub>2</sub>), 2.90 (sept, <sup>3</sup>J<sub>HH</sub> = 6.85 Hz, 1 H, *p*-CH(CH<sub>3</sub>)<sub>2</sub>), 2.84 (sept, <sup>3</sup>J<sub>HH</sub> = 6.91 Hz, 2 H, *p*-CH(CH<sub>3</sub>)<sub>2</sub>), 2.68 (sept, <sup>3</sup>J<sub>HH</sub> = 6.58 Hz, 2 H, *o*-CH(CH<sub>3</sub>)<sub>2</sub>), 2.58 (sept, <sup>3</sup>J<sub>HH</sub> = 6.58 Hz, 2 H, *o*-CH(CH<sub>3</sub>)<sub>2</sub>), 2.00 (s (br), 1 H, *o*-CH(CH<sub>3</sub>)<sub>2</sub>), 1.47 (s (br), 6 H, *o*-CH(CH<sub>3</sub>)<sub>2</sub>) 1.21-1.16 (m, 18 H, *p*-CH(CH<sub>3</sub>)<sub>2</sub>), 0.97 (d, <sup>3</sup>J<sub>HH</sub> = 6.75 Hz, 6 H, *o*-CH(CH<sub>3</sub>)<sub>2</sub>), 0.91 (d, <sup>3</sup>J<sub>HH</sub> = 6.51 Hz, 6 H, *o*-CH(CH<sub>3</sub>)<sub>2</sub>), 0.68 (d, <sup>3</sup>J<sub>HH</sub> = 6.51 Hz, 6 H, *o*-CH(CH<sub>3</sub>)<sub>2</sub>), 0.64 (d, <sup>3</sup>J<sub>HH</sub> = 6.75 Hz, 6 H, *o*-CH(CH<sub>3</sub>)<sub>2</sub>), 0.25 (s (br), 6 H, *o*-CH(CH<sub>3</sub>)<sub>2</sub>); <sup>11</sup>B NMR (128.4 MHz, 297 K, CD<sub>2</sub>Cl<sub>2</sub>): δ [ppm] -16.75 (s); <sup>13</sup>C{<sup>1</sup>H} NMR (100.6 MHz, 297 K, CD<sub>2</sub>Cl<sub>2</sub>): δ [ppm] 157.63 (br), 155.81 (Trip-C), 154.89 (Trip-C), 154.35 (Trip-C), 153.87 (Trip-C), 153.63 (Trip-C), 149.79 (br, Trip-C), 147.35 (br, Trip-C), 142.35 (Naph-*ipso*-C), 141.11 (Naph-C), 140.12 (Naph-*ipso*-C), 139.86 (br, Trip-C), 138.43 (Naph-*CH*), 137.87 (br, Trip-C), 137.37 (Naph-10-C), 136.03 (Naph-*CH*), 135.47 (br, Trip-C), 134.54 (Naph-*CH*), 134.32, 132.36 (Naph-*CH*), 128.45 (Trip-C), 128.0 (Trip-C), 127.93 (Naph-3/5-*CH*), 127.85 (Naph-3/5-*CH*), 125.91 (Trip-*m*-C), 125.31 (Trip-*m*-*CH*), 124.07 (Trip-*m*-*CH*), 40.39 (*o*-CH(CH<sub>3</sub>)<sub>2</sub>), 38.73 (*o*-CH(CH<sub>3</sub>)<sub>2</sub>), 37.26 (*o*-CH(CH<sub>3</sub>)<sub>2</sub>), 34.78 (*p*-CH(CH<sub>3</sub>)<sub>2</sub>), 34.69 (*p*-CH(CH<sub>3</sub>)<sub>2</sub>), 34.54 (*p*-CH(CH<sub>3</sub>)<sub>2</sub>), 25.05 (*o*-CH(CH<sub>3</sub>)<sub>2</sub>), 24.46 (*o*-CH(CH<sub>3</sub>)<sub>2</sub>), 23.96 (*o*-CH(CH<sub>3</sub>)<sub>2</sub>), 23.83 (*p*-CH(CH<sub>3</sub>)<sub>2</sub>), 23.72 (*p*-CH(CH<sub>3</sub>)<sub>2</sub>), 23.68 (*p*-CH(CH<sub>3</sub>)<sub>2</sub>), 23.07 (br, *o*-CH(CH<sub>3</sub>)<sub>2</sub>), 14.28 (br, *o*-CH(CH<sub>3</sub>)<sub>2</sub>); <sup>19</sup>F NMR (376.5 MHz, 297 K, CD<sub>2</sub>Cl<sub>2</sub>): δ [ppm] -133.26 (br-s, 2 F, BAR<sup>F</sup>-*o*/*m*-CF), -163.84 (t, <sup>3</sup>J<sub>FF</sub> = 20.55 Hz, 1 F, BAR<sup>F</sup>-*p*-CF), -167.72 (br-t, <sup>3</sup>J<sub>FF</sub>

= 18.19 Hz, 2 F,  $\text{BAr}^{\text{F-}}\text{-o/m-CF}$ );  **$^1\text{H NMR}$  (300.1 MHz, 242 K,  $\text{CD}_2\text{Cl}_2$ ):  $\delta$  [ppm]** 8.18 (d,  $^3J_{\text{HH}} = 7.98$  Hz, 1 H, Naph-H), 8.09-8.04 (m, 3 H, Naph-H), 7.76 (dd,  $^3J_{\text{HH}} = 7.91$  Hz,  $^3J_{\text{HH}} = 7.38$  Hz, 1 H, Naph-*m*-H), 7.68 (dd,  $^3J_{\text{HH}} = 8.17$  Hz,  $^3J_{\text{HH}} = 6.81$  Hz, 1 H, Naph-*m*-H), 7.16 (d,  $^4J_{\text{HH}} = 1.61$  Hz, 1 H, Sb<sup>+</sup>-Ph-*m*-H), 7.12 (s, 2 H, Ph-*m*-H), 7.00 (s, 2 H, Ph-*m*-H), 7.00 (s, 2 H, Ph-*m*-H), 6.89 (d,  $^4J_{\text{HH}} = 1.37$  Hz, 1 H, Ph-*m*-H), 3.72 (sept,  $^3J_{\text{HH}} = 6.57$  Hz, 1 H, *o*-CH(CH<sub>3</sub>)<sub>2</sub>), 2.85 (sept,  $^3J_{\text{HH}} = 6.72$  Hz, 1 H, *p*-CH(CH<sub>3</sub>)<sub>2</sub>), 2.79 (sept,  $^3J_{\text{HH}} = 6.47$  Hz, 2 H, *p*-CH(CH<sub>3</sub>)<sub>2</sub>), 2.62 (sept,  $^3J_{\text{HH}} = 6.22$  Hz, 2 H, *o*-CH(CH<sub>3</sub>)<sub>2</sub>), 2.50 (sept,  $^3J_{\text{HH}} = 6.22$  Hz, 2 H, *o*-CH(CH<sub>3</sub>)<sub>2</sub>), 1.91 (sept,  $^3J_{\text{HH}} = 6.72$  Hz, 1 H, *o*-CH(CH<sub>3</sub>)<sub>2</sub>), 1.45 (d,  $^3J_{\text{HH}} = 6.29$  Hz, 3 H, CH(CH<sub>3</sub>)<sub>2</sub>), 1.26 (d,  $^3J_{\text{HH}} = 6.29$  Hz, 3 H, *o*-CH(CH<sub>3</sub>)<sub>2</sub>), 1.15-1.09 (m, 18 H, *p*-CH(CH<sub>3</sub>)<sub>2</sub>), 0.91 (d,  $^3J_{\text{HH}} = 6.71$  Hz, 6 H, *o*-CH(CH<sub>3</sub>)<sub>2</sub>), 0.82 (d,  $^3J_{\text{HH}} = 6.29$  Hz, 6 H, *o*-CH(CH<sub>3</sub>)<sub>2</sub>), 0.63 (d,  $^3J_{\text{HH}} = 6.29$  Hz, 6 H, *o*-CH(CH<sub>3</sub>)<sub>2</sub>), 0.56 (d,  $^3J_{\text{HH}} = 6.71$  Hz, 6 H, *o*-CH(CH<sub>3</sub>)<sub>2</sub>), 0.17 (d,  $^3J_{\text{HH}} = 6.71$  Hz, 3 H, *o*-CH(CH<sub>3</sub>)<sub>2</sub>), 0.12 (d,  $^3J_{\text{HH}} = 6.71$  Hz, 3 H, *o*-CH(CH<sub>3</sub>)<sub>2</sub>); **IR  $\nu$  [ $\text{cm}^{-1}$ ]**: 2955 (w), 2922 (w), 2859 (w), 1637 (w), 1587 (w), 1556 (w), 1506 (m), 1458 (s), 1412 (w), 1381 (w), 1359 (w), 1304 (w), 1255 (m), 1079 (m), 976 (s), 876 (w), 812 (m), 766 (m), 753 (m), 680 (m), 658 (m), 604 (w), 568 (w), 510 (w).

**Synthesis of (TripSb)<sub>2</sub>Naph (4). 3** (0.06 mmol, 100 mg) and  $\text{Kc}_8$  (0.06 mmol, 8 mg) were dissolved in 10 mL of thf. The suspension was stirred for 12 h and then filtered, giving a pale-yellow solution. The solvent was removed *in vacuo*, and the remaining residue was extracted with *n*-hexane (3 x 5 mL) and concentrated until the formation of precipitate. The solid was redissolved in the heat and the solution was stored at +4 °C to give a yellow crystalline solid.

**Yield:** 17 mg (37 %); **m.p.:** 245.8 °C; **elemental analysis [wt-%]:** calcd. for  $\text{C}_{40}\text{H}_{52}\text{Sb}_2$ : C 61.88, H 6.75. found: C 61.8, H 6.56;  **$^1\text{H NMR}$  (400.1 MHz, 297 K,  $\text{CD}_2\text{Cl}_2$ ):  $\delta$  [ppm]** 7.86 (dd,  $^3J_{\text{HH}} = 6.79$  Hz,  $^4J_{\text{HH}} = 1.21$  Hz, 2 H, Naph-2/7-CH), 7.71 (dd,  $^3J_{\text{HH}} = 8.21$  Hz,  $^4J_{\text{HH}} = 1.11$  Hz, 2 H, Naph-4/5-CH), 7.38 (dd,  $^3J_{\text{HH}} = 8.11$  Hz,  $^3J_{\text{HH}} = 6.85$  Hz, 2 H, Naph-3/6-CH), 6.94 (s, 4 H, Ph-*m*-H), 3.25 (sept,  $^3J_{\text{HH}} = 6.78$  Hz, 4 H, *o*-CH(CH<sub>3</sub>)<sub>2</sub>), 2.82 (sept,  $^3J_{\text{HH}} = 6.97$  Hz, 2 H, *p*-CH(CH<sub>3</sub>)<sub>2</sub>), 1.21 (dd,  $^3J_{\text{HH}} = 6.88$  Hz,  $^4J_{\text{HH}} = 2.06$  Hz, 12 H, *p*-CH(CH<sub>3</sub>)<sub>2</sub>), 1.14 (d,  $^3J_{\text{HH}} = 6.84$  Hz, 12 H, *o*-CH(CH<sub>3</sub>)<sub>2</sub>), 0.64 (d,  $^3J_{\text{HH}} = 6.65$  Hz, 12 H, *o*-CH(CH<sub>3</sub>)<sub>2</sub>);  **$^{13}\text{C}\{^1\text{H}\}$  NMR (100.6 MHz, 297 K,  $\text{CD}_2\text{Cl}_2$ ):  $\delta$  [ppm]** 156.69 (Ph-*o*-C), 150.20 (Ph-*p*-C), 147.95 (Naph-9-C), 145.02 (Naph-10-C), 138.75 (Naph-2/7-CH), 138.47 (Naph-1,8-C), 134.67 (Ph-*ipso*-C), 128.92 (Naph-4,5-CH), 125.91 (Naph-3,6-CH), 122.34 (Ph-*m*-CH), 38.20 (*o*-CH(CH<sub>3</sub>)<sub>2</sub>), 34.48 (*p*-CH(CH<sub>3</sub>)<sub>2</sub>), 25.27 (*o*-CH(CH<sub>3</sub>)<sub>2</sub>), 24.39 (*o*-CH(CH<sub>3</sub>)<sub>2</sub>), 24.06 (*p*-CH(CH<sub>3</sub>)<sub>2</sub>); **IR  $\nu$  [ $\text{cm}^{-1}$ ]**: 3030 (w), 2943 (s), 2914 (m), 2891 (m), 2854 (m), 1585 (w), 1546 (w), 1533 (w), 1451 (m), 1408 (m), 1375 (m), 1355 (m), 1339 (w), 1296 (w), 1255 (m), 1228 (w), 1191 (w), 1163 (w), 1092 (m), 1059 (m), 1048 (m), 1018 (m), 972 (w), 931 (w), 872 (m), 806 (s), 769 (s), 740 (m), 704 (w), 670 (w), 643 (w), 620 (w), 557 (w), 509 (w), 463 (w), 444 (w), 428 (w).

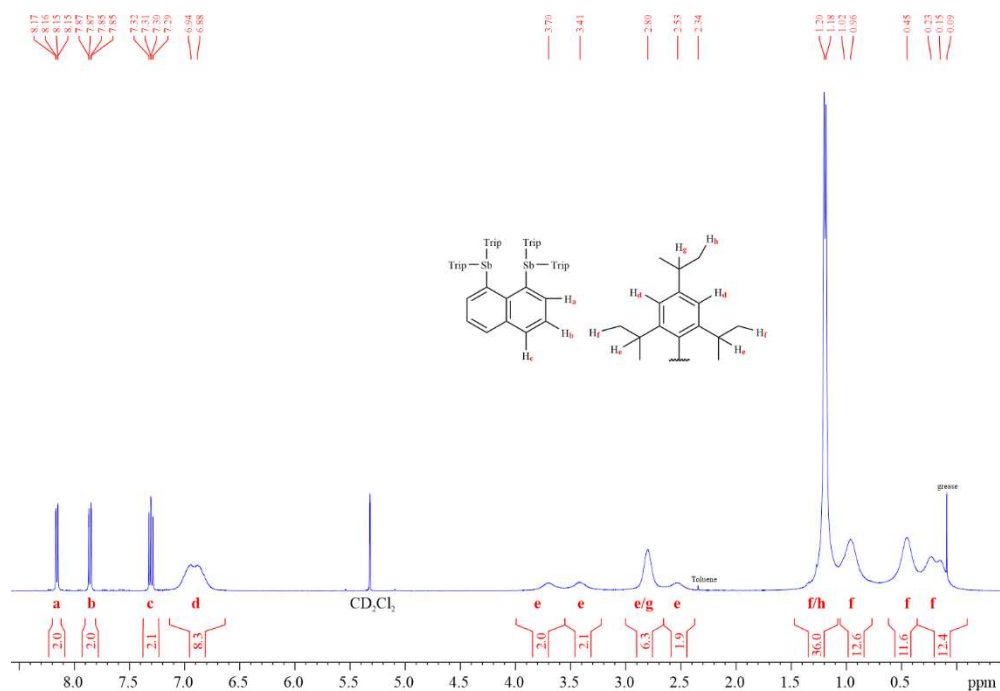

Figure S1.  $^1\text{H}$  NMR spectrum of  $(\text{Trip}_2\text{Sb})_2\text{Naph}$  (**1**) in  $\text{CD}_2\text{Cl}_2$ .

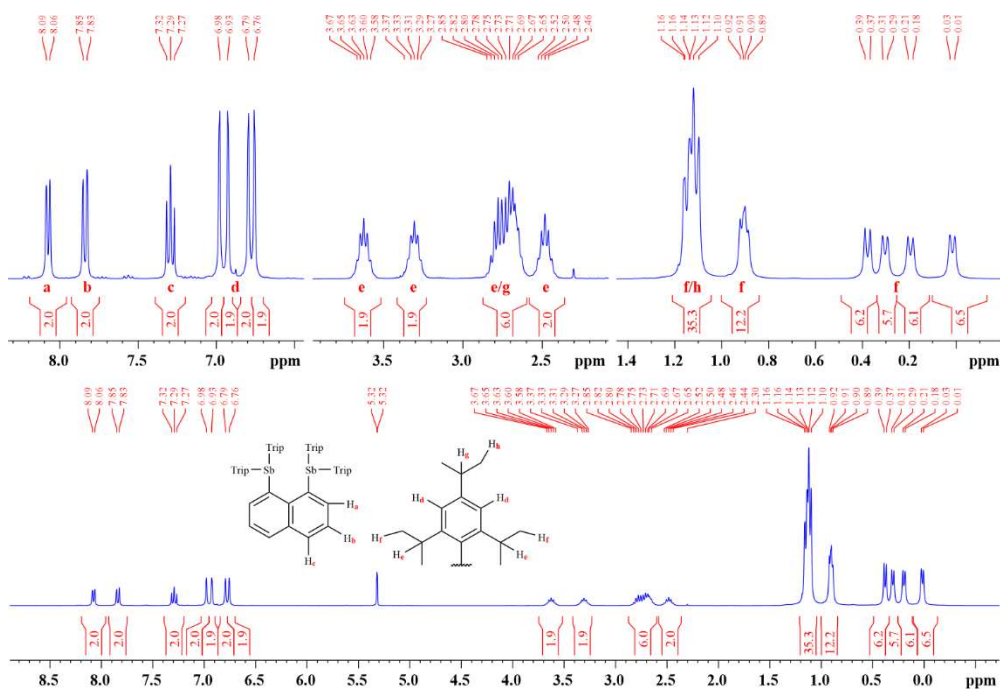

Figure S2.  $^1\text{H}$  NMR spectrum of  $(\text{Trip}_2\text{Sb})_2\text{Naph}$  (**1**) in  $\text{CD}_2\text{Cl}_2$  recorded at  $-40^\circ\text{C}$ .



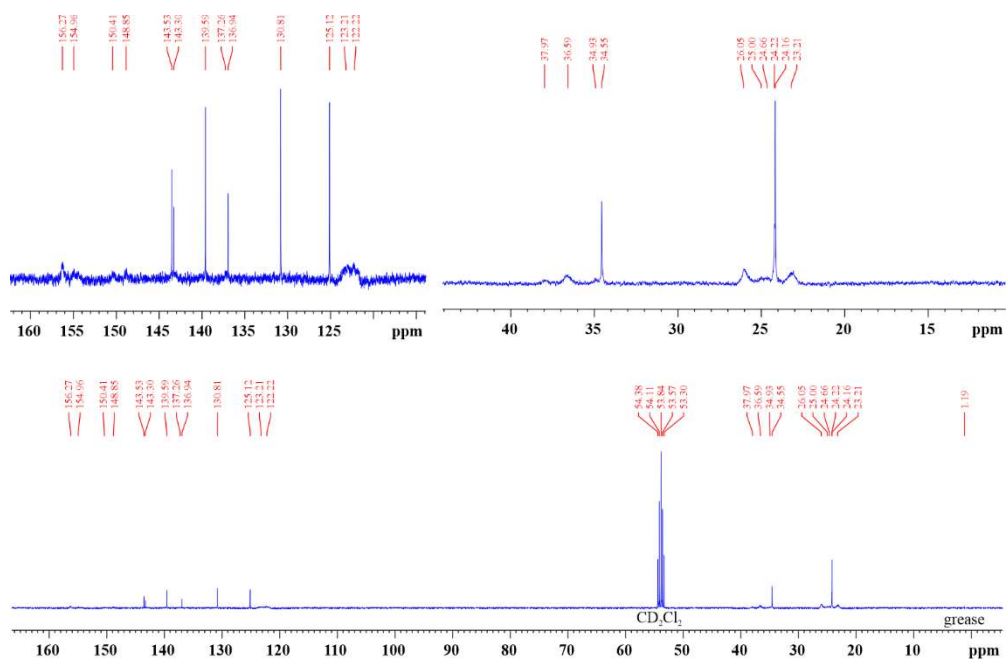

Figure S3.  $^{13}\text{C}\{^1\text{H}\}$  NMR spectrum of  $(\text{Trip}_2\text{Sb})_2\text{Naph}$  (**1**) in  $\text{CD}_2\text{Cl}_2$ .

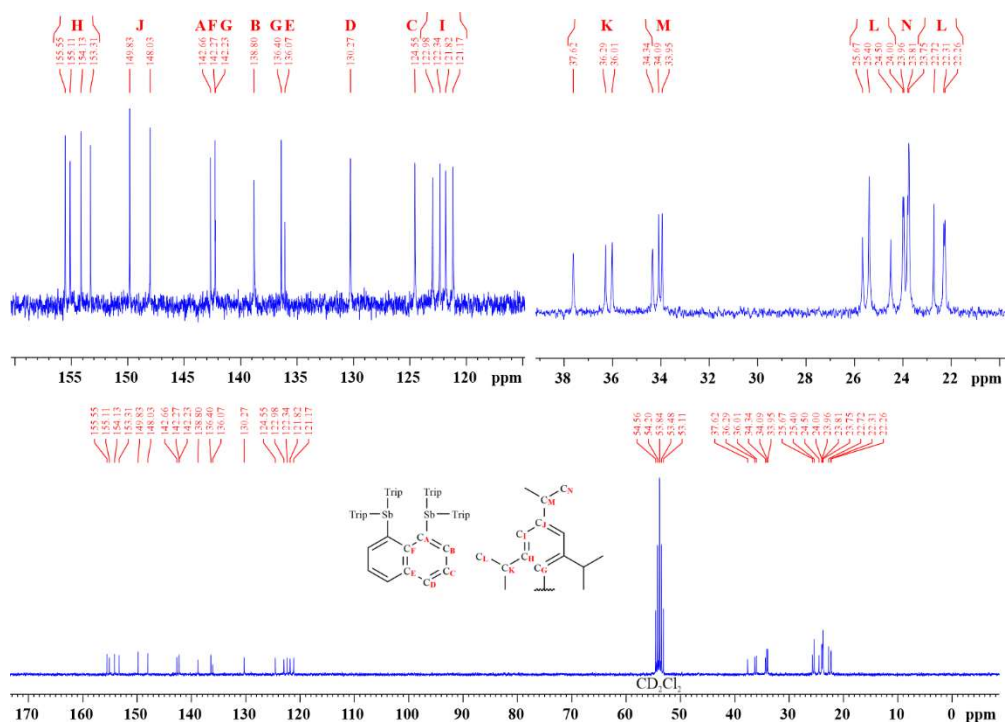

Figure S4.  $^{13}\text{C}\{^1\text{H}\}$  NMR spectrum of  $(\text{Trip}_2\text{Sb})_2\text{Naph}$  (**1**) in  $\text{CD}_2\text{Cl}_2$  recorded at  $-40^\circ\text{C}$ .

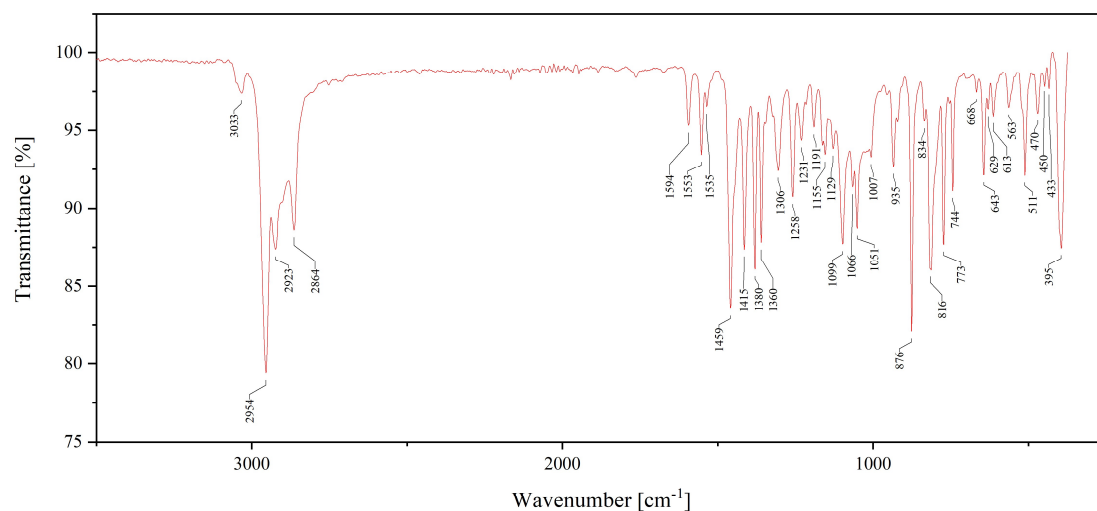

Figure S5. IR spectrum of neat  $(\text{Trip}_2\text{Sb})_2\text{Naph}$  (**1**).

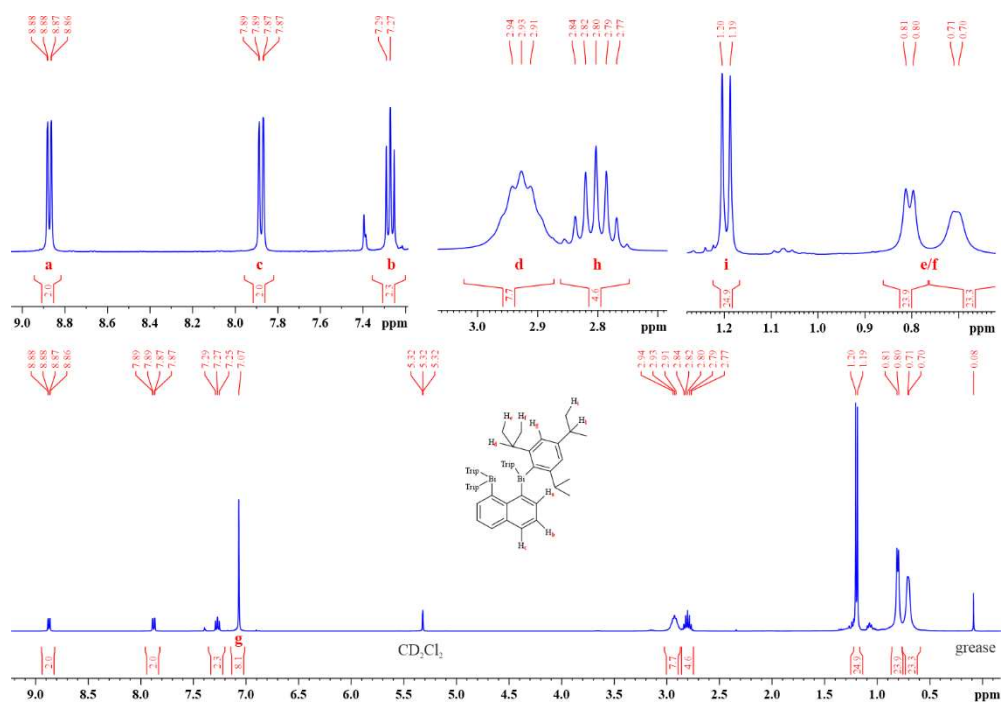

Figure S6.  $^1\text{H}$  NMR spectrum of  $(\text{Trip}_2\text{Bi})_2\text{Naph}$  (**2**) in  $\text{CD}_2\text{Cl}_2$ .

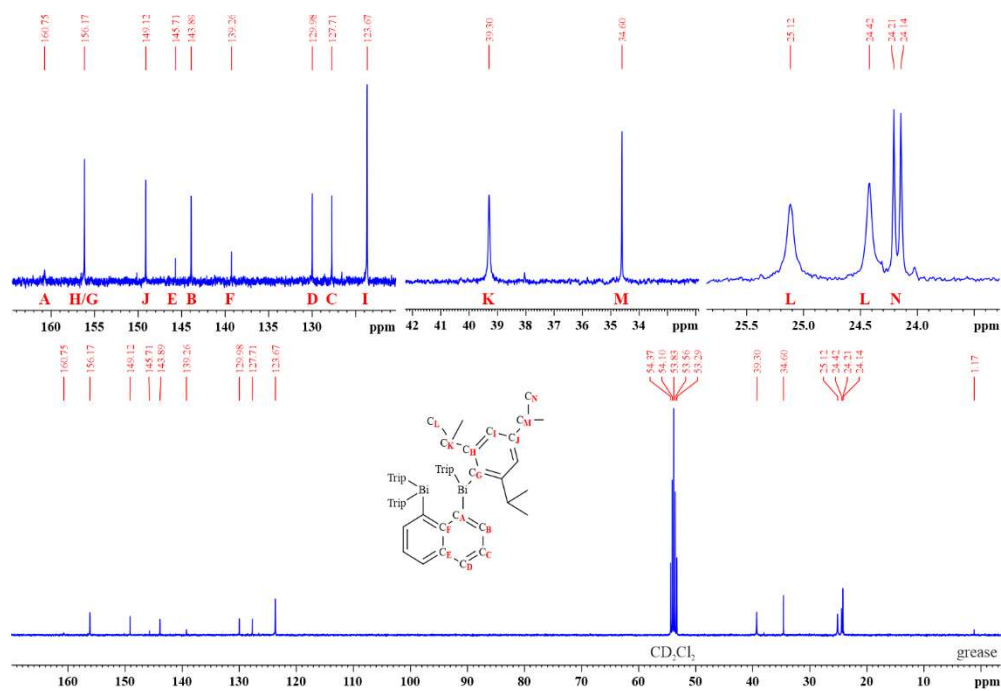

Figure S7.  $^{13}\text{C}\{^1\text{H}\}$  NMR spectrum of  $(\text{Trip}_2\text{Bi})_2\text{Naph}$  (**2**) in  $\text{CD}_2\text{Cl}_2$ .

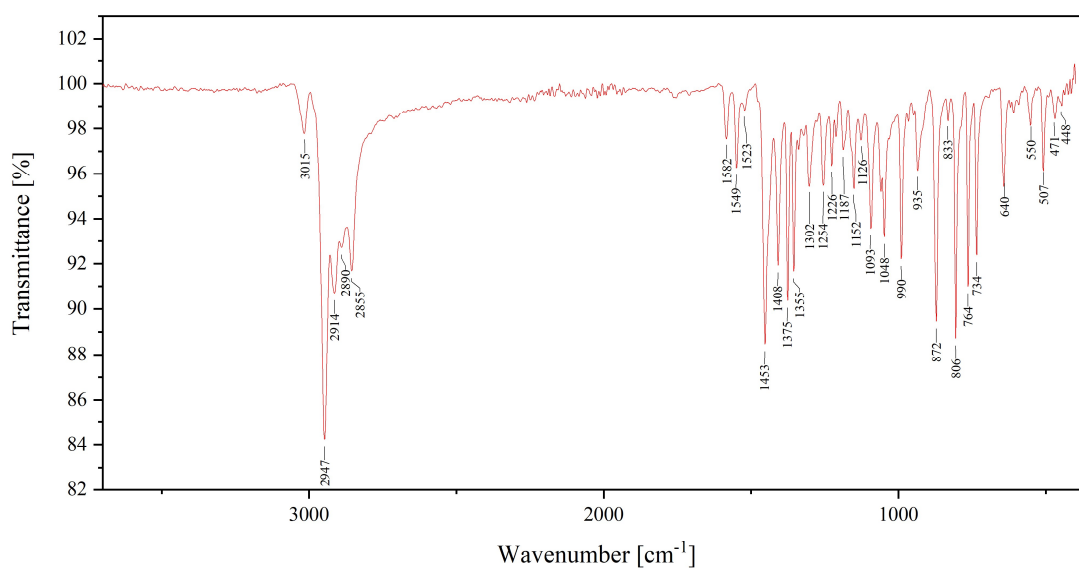

Figure S8. IR spectrum of neat  $(\text{Trip}_2\text{Bi})_2\text{Naph}$  (**2**).

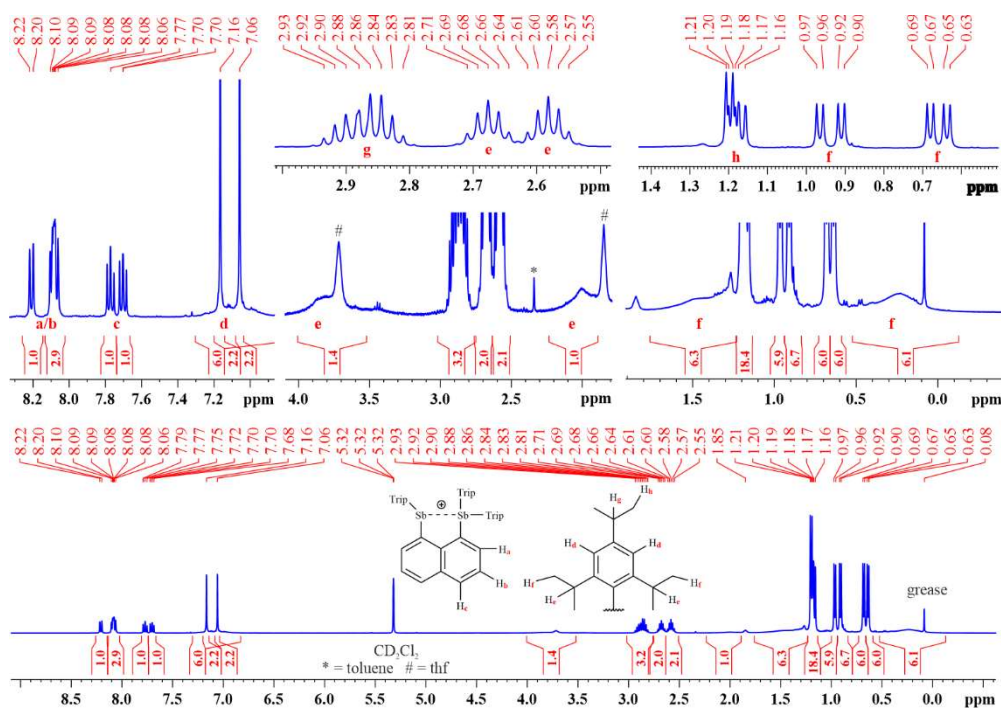

**Figure S9.**  $^1\text{H}$  NMR spectrum of  $[(\text{Trip}_2\text{Sb})(\text{TripSb})\text{Naph}][\text{BAR}^{\text{F}-20}]$  (**3**) in  $\text{CD}_2\text{Cl}_2$ . Due to overlap of signals and lack of crosspeaks in 2D NMR spectra, no exact assignment of  $^1\text{H}$  NMR signals to the corresponding protons was possible.

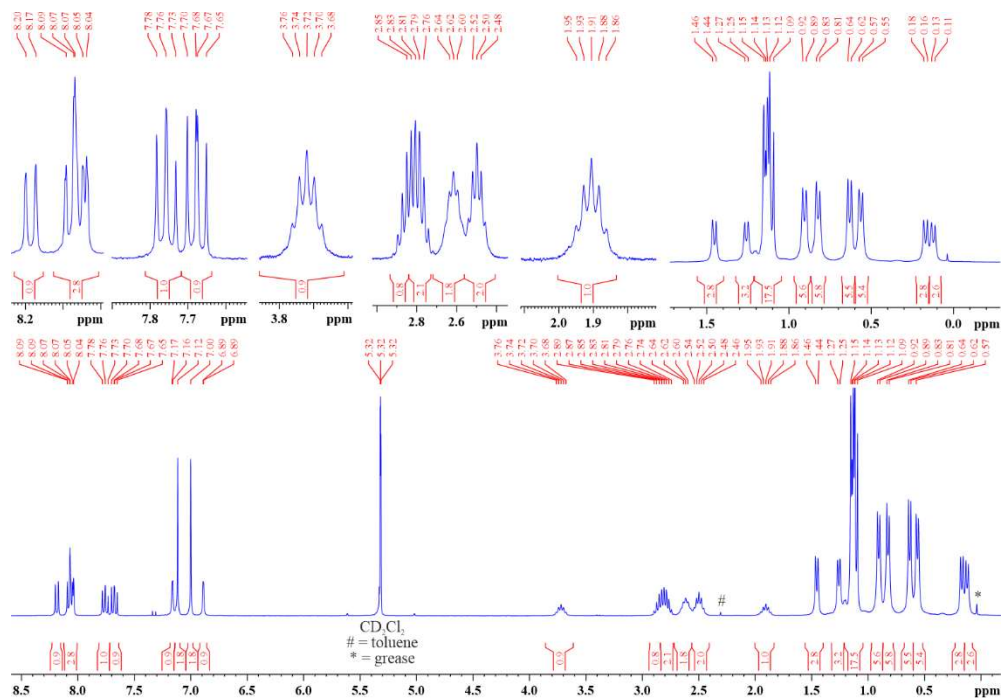

**Figure S10.**  $^1\text{H}$  NMR spectrum of  $[(\text{Trip}_2\text{Sb})(\text{TripSb})\text{Naph}][\text{BAR}^{\text{F}-20}]$  (**3**) in  $\text{CD}_2\text{Cl}_2$  at  $-30\text{ }^\circ\text{C}$ . Due to low intensity in  $^{13}\text{C}\{^1\text{H}\}$  NMR spectra, no complete assignment of  $^1\text{H}$  NMR to the corresponding protons was possible.

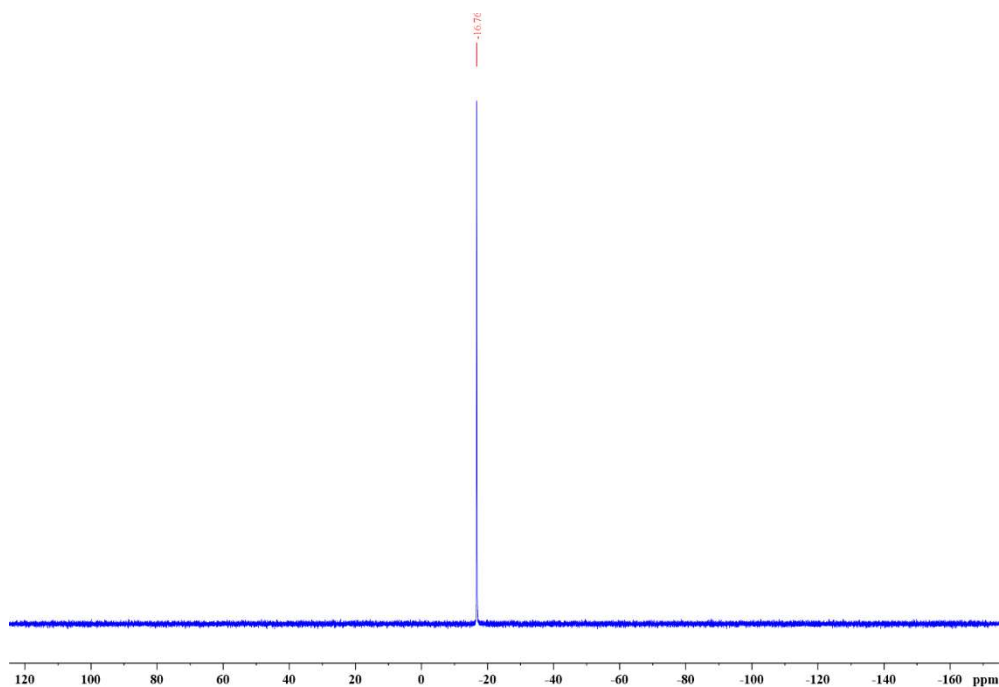

Figure S11.  $^{11}\text{B}$  NMR spectrum of  $[(\text{Trip}_2\text{Sb})(\text{TripSb})\text{Naph}][\text{BAR}^{\text{F-20}}]$  (**3**) in  $\text{CD}_2\text{Cl}_2$ .

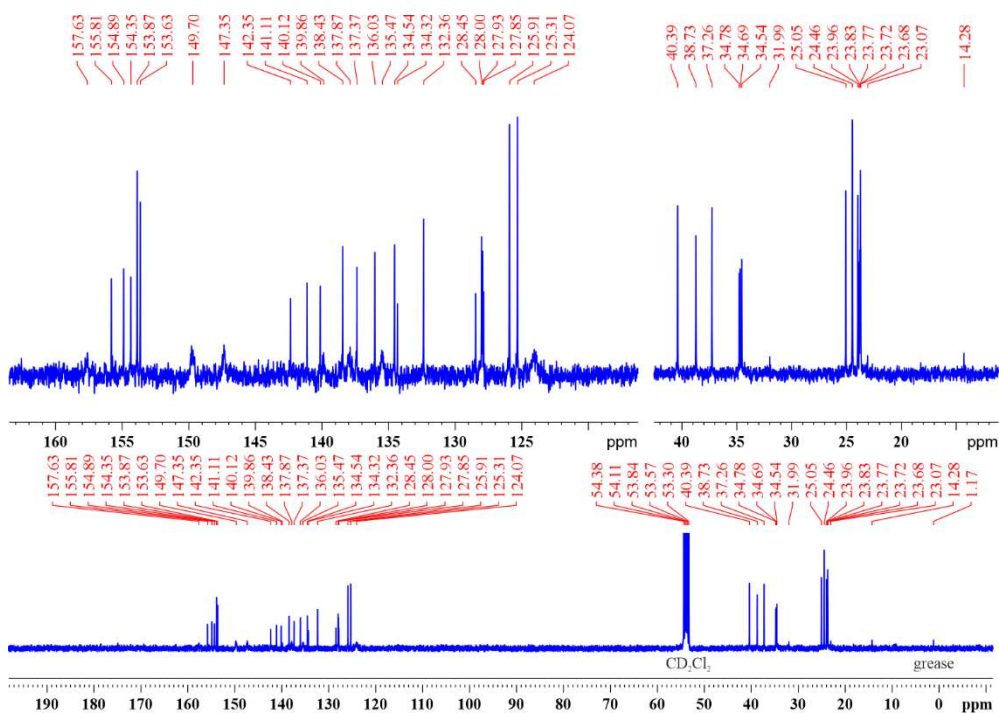

Figure S12.  $^{13}\text{C}\{^1\text{H}\}$  NMR spectrum of  $[(\text{Trip}_2\text{Sb})(\text{TripSb})\text{Naph}][\text{BAR}^{\text{F-20}}]$  (**3**) in  $\text{CD}_2\text{Cl}_2$ . Due to a lack of crosspeaks in 2D NMR spectra, no exact assignment of  $^{13}\text{C}$  NMR signals to the corresponding carbon atoms was possible.

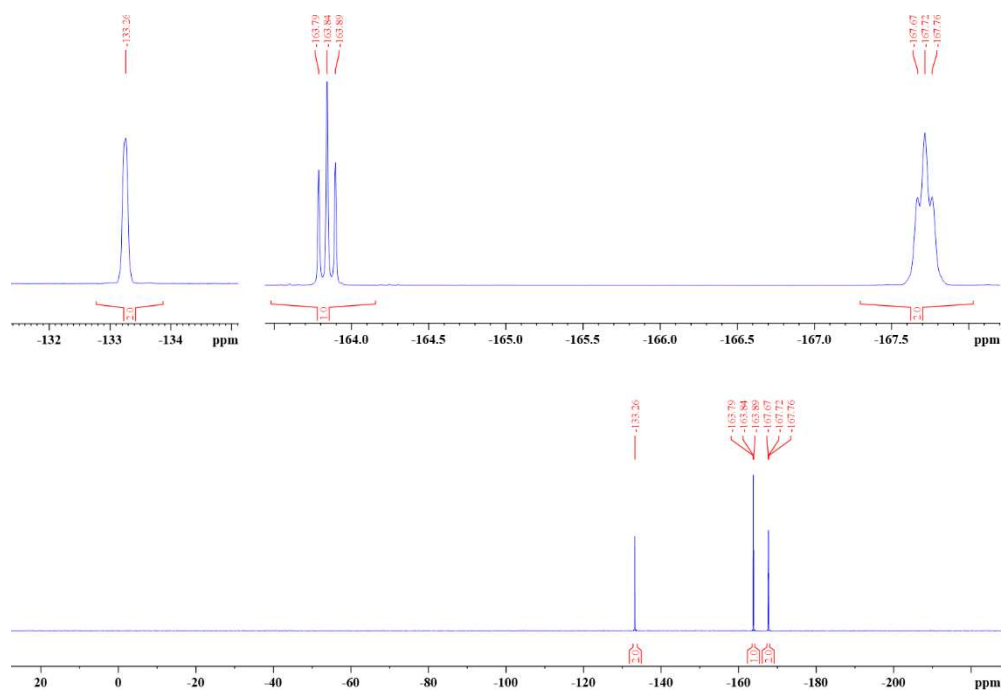

**Figure S13.**  $^{19}\text{F}$  NMR spectrum of  $[(\text{Trip}_2\text{Sb})(\text{TripSb})\text{Naph}][\text{BAR}^{\text{F}-20}]$  (**3**) in  $\text{CD}_2\text{Cl}_2$ .

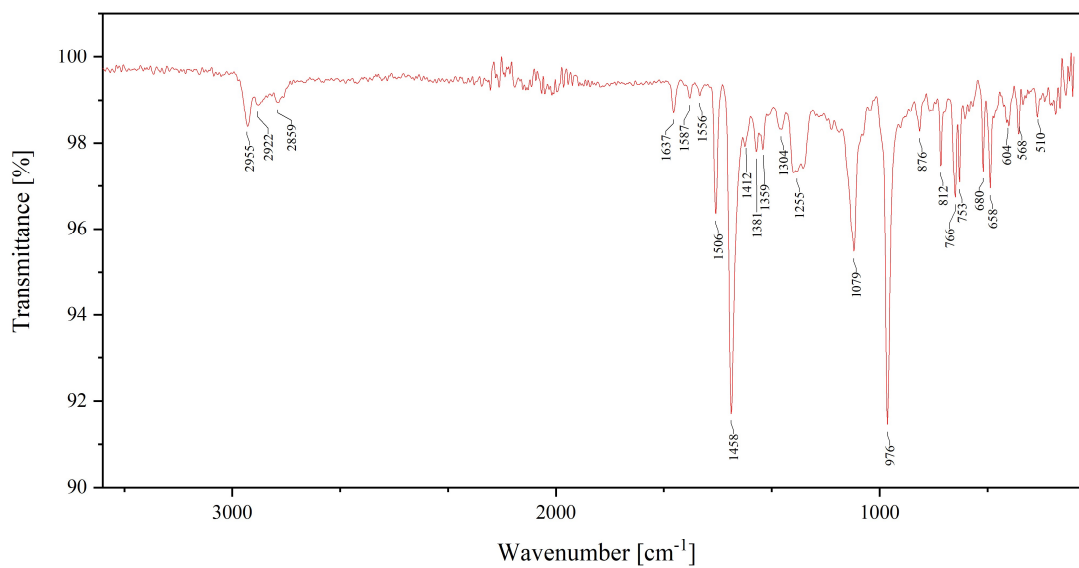

**Figure S14.** IR spectrum of neat  $[(\text{Trip}_2\text{Sb})(\text{TripSb})\text{Naph}][\text{BAR}^{\text{F}-20}]$  (**3**).

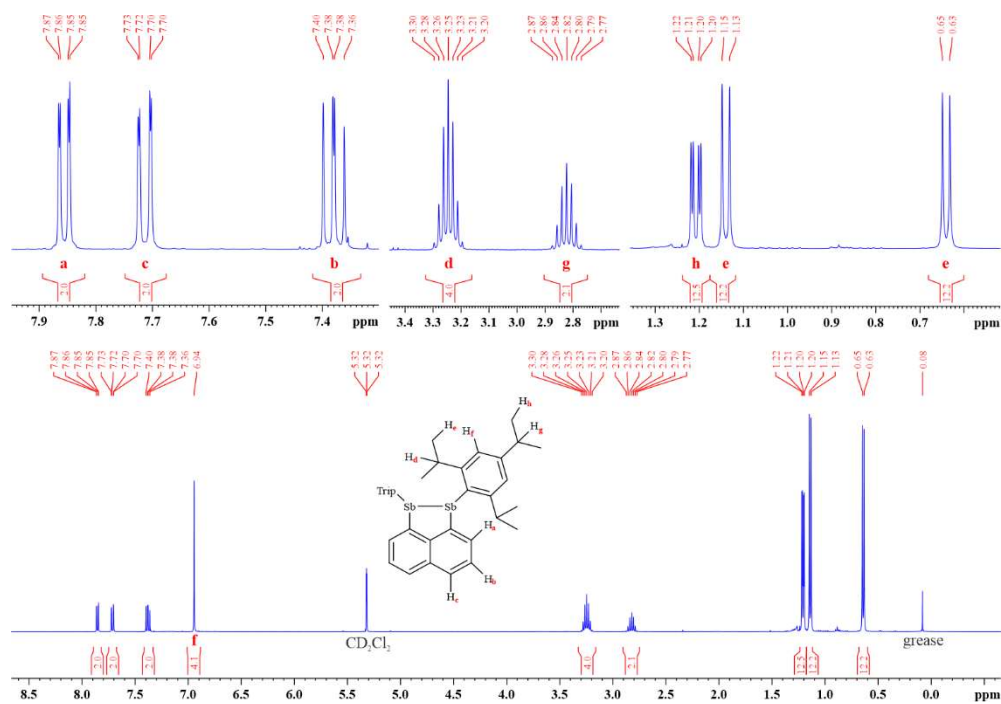

Figure S15.  $^1\text{H}$  NMR spectrum of  $(\text{TripSb})_2\text{Naph}$  (**4**) in  $\text{CD}_2\text{Cl}_2$ .

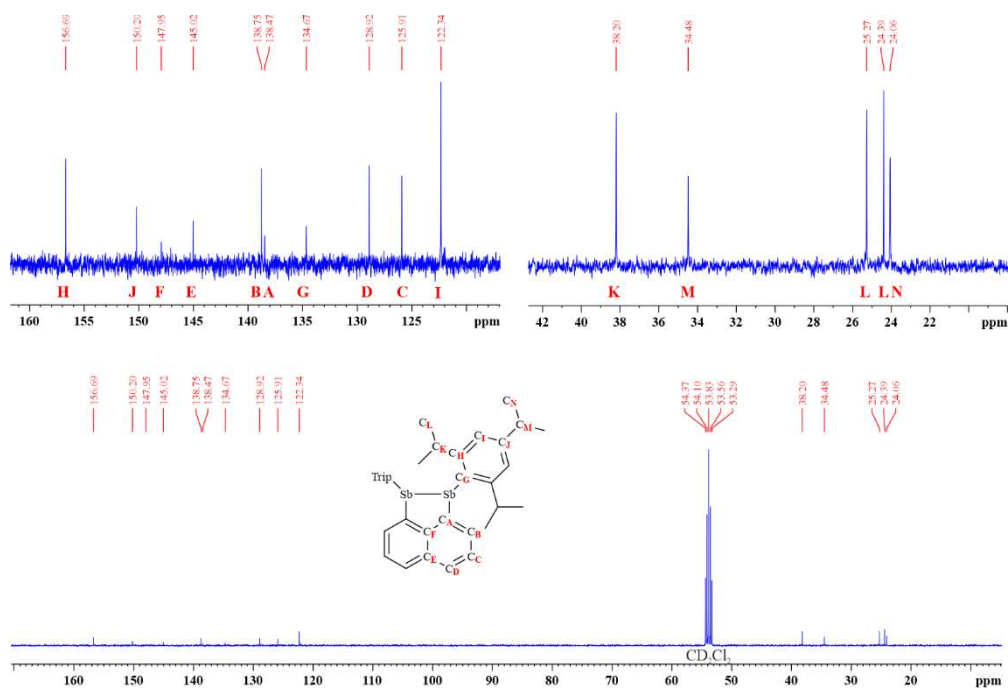

Figure S16.  $^{13}\text{C}\{^1\text{H}\}$  NMR spectrum of  $(\text{TripSb})_2\text{Naph}$  (**4**) in  $\text{CD}_2\text{Cl}_2$ .

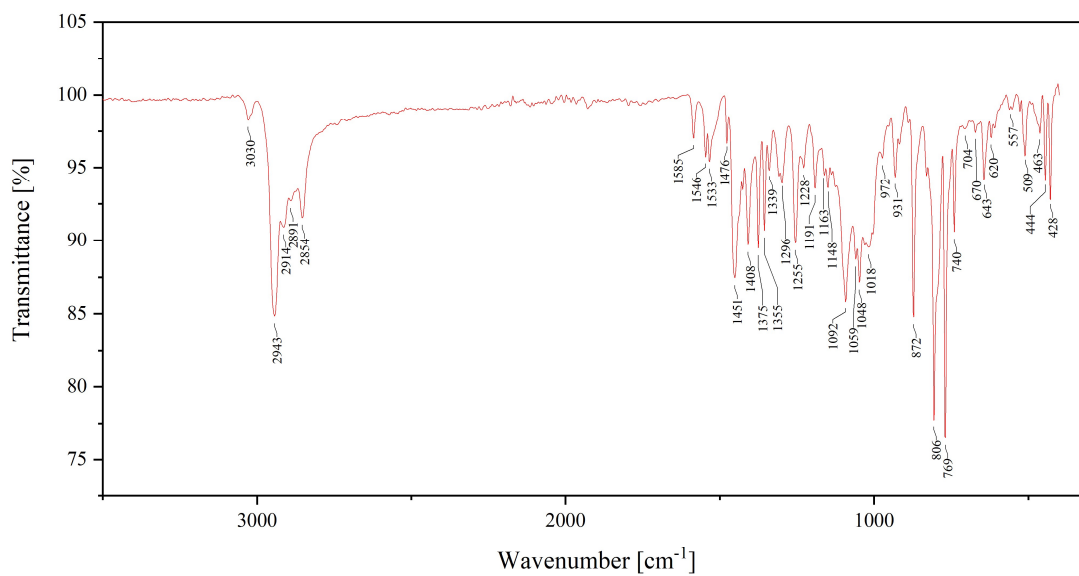

Figure S17. IR spectrum of neat (TripSb)<sub>2</sub>Naph (4).

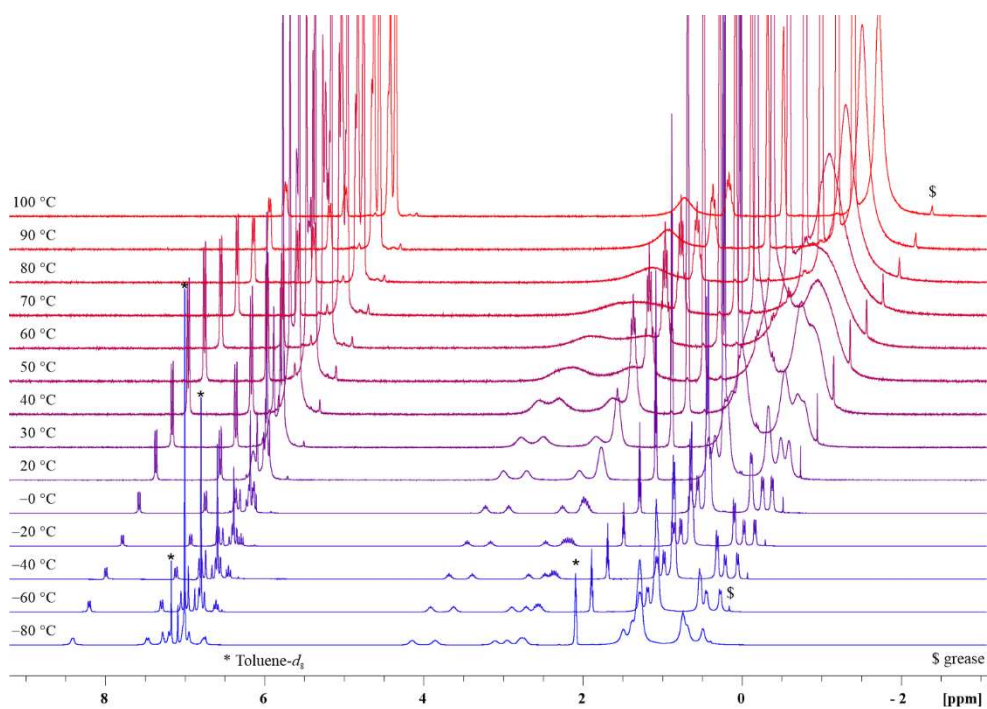

Figure S18. <sup>1</sup>H VT-NMR spectrum of (Trip<sub>2</sub>Sb)<sub>2</sub>Naph (1) in toluene-*d*<sub>8</sub>.



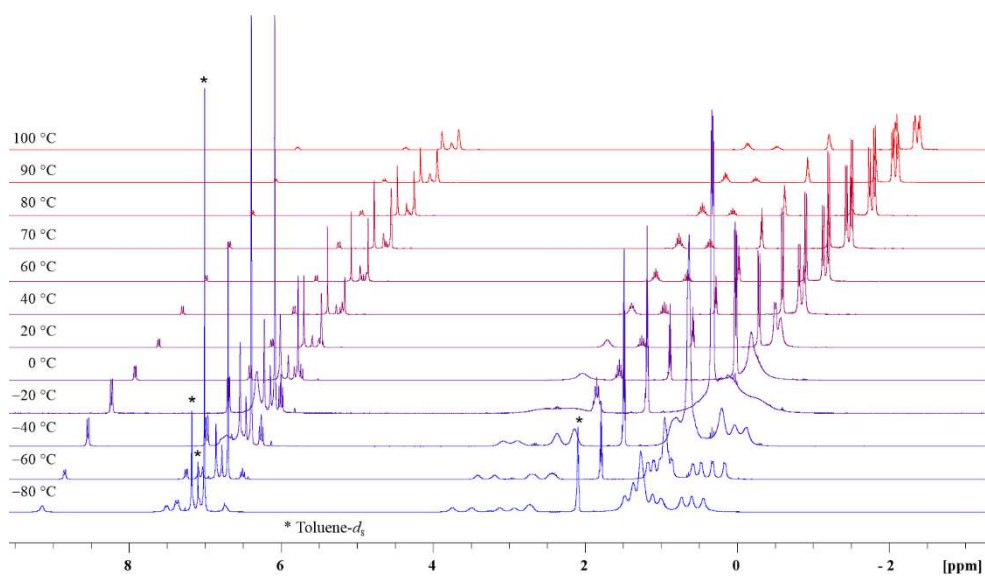

**Figure S19.**  $^1\text{H}$  VT-NMR spectrum of  $(\text{Trip}_2\text{Bi})_2\text{Naph}$  (**2**) in toluene- $d_8$ .

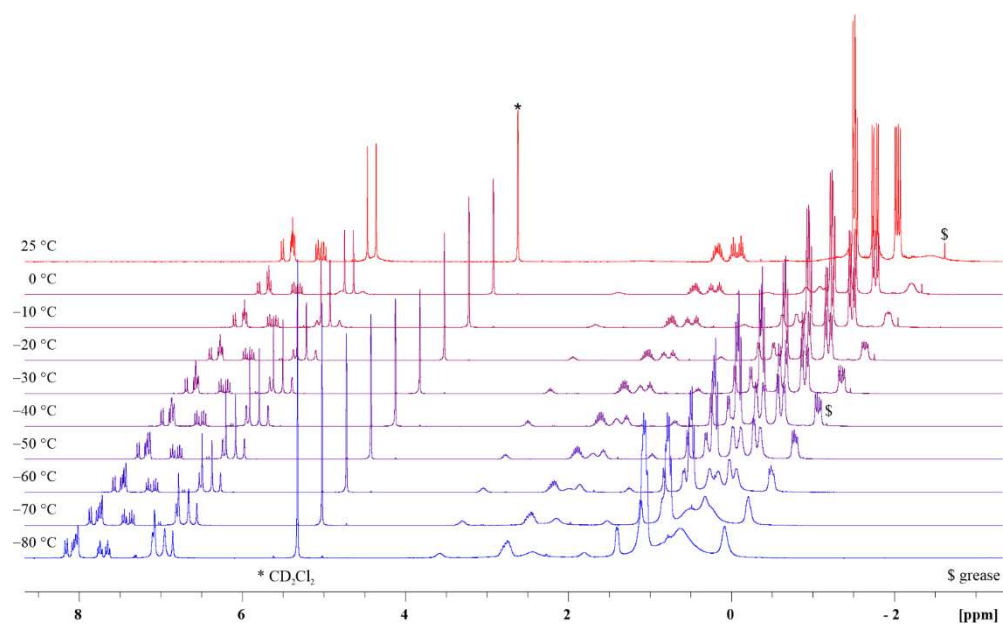

**Figure S20.**  $^1\text{H}$  VT-NMR spectrum of  $[(\text{Trip}_2\text{Sb})(\text{TripSb})\text{Naph}][\text{BAR}^{\text{F-20}}]$  (**3**) in  $\text{CD}_2\text{Cl}_2$ .

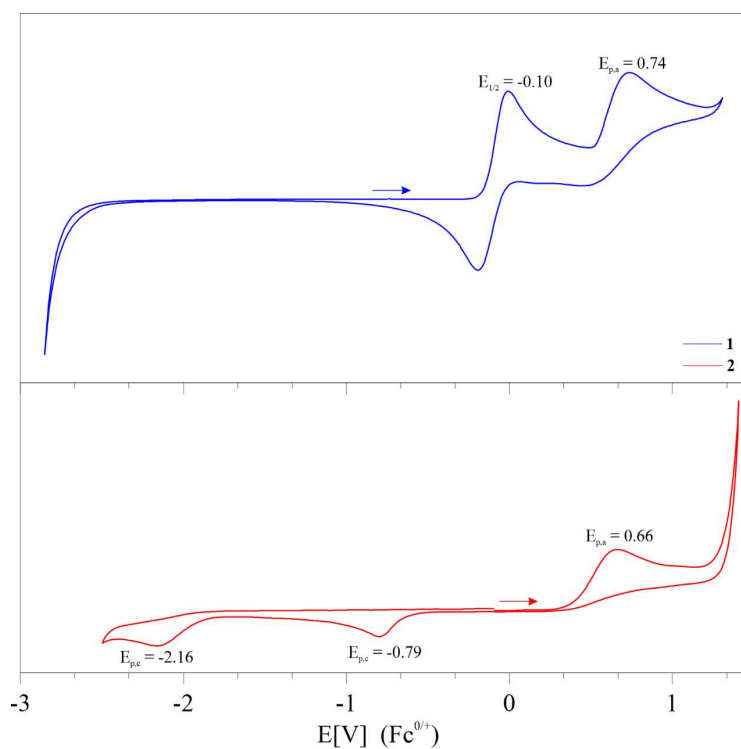

**Figure S21.** Cyclic voltammograms of solutions (1 mM) in DCM with [ $n\text{Bu}_4\text{N}$ ][ $\text{B}(3,5\text{-(CF}_3)_2\text{-C}_6\text{H}_3)_4$ ] (100 mM) as the electrolyte. **1** shows two oxidation events, while one is observed for **2**.

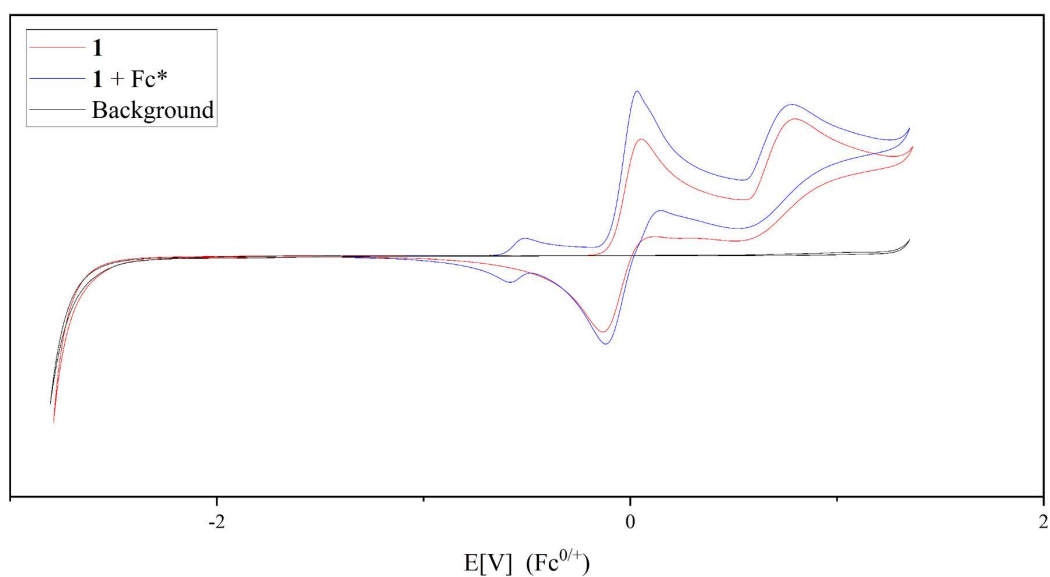

**Figure S22.** Cyclic voltammogram of  $(\text{Trip}_2\text{Sb})_2\text{Naph}$  (**1**) in DCM solution (1 mM) at ambient temperature containing [ $n\text{Bu}_4\text{N}$ ][ $\text{B}(3,5\text{-(CF}_3)_2\text{-C}_6\text{H}_3)_4$ ] (50 mM) as electrolyte and  $\text{Fc}^*$  as the internal standard ( $E_{1/2} -0.545\text{ V vs Fc}^{0+}$ ).<sup>5</sup>

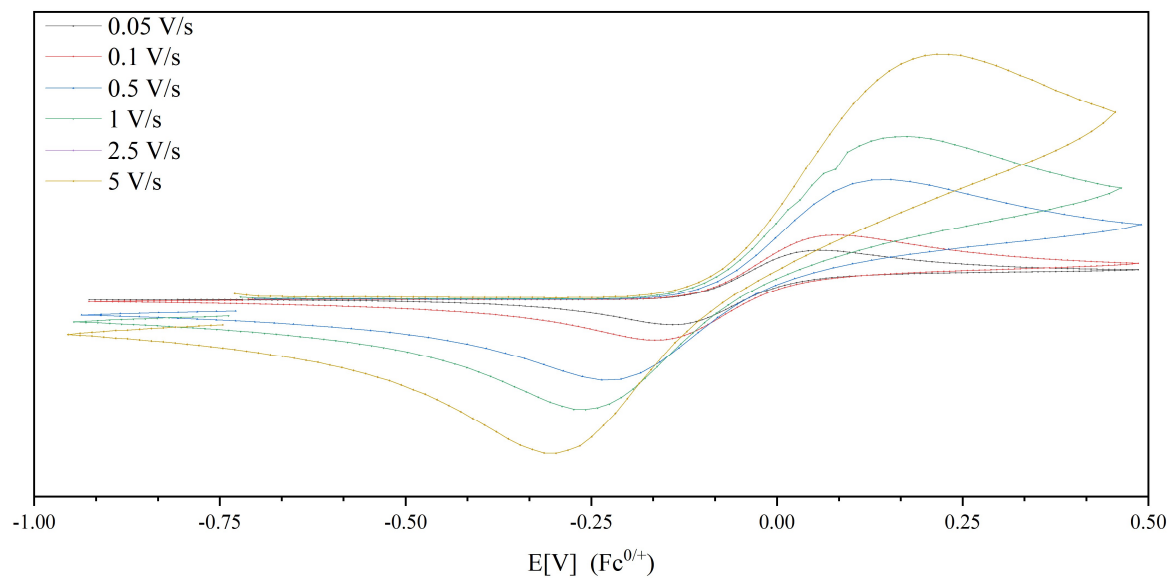

**Figure S23.** Cyclic voltammogram of  $(\text{Trip}_2\text{Sb})_2\text{Naph}$  (**1**) in DCM solution (1 mM) at ambient temperature containing  $[\text{nBu}_4\text{N}][\text{B}(3,5\text{-(CF}_3)_2\text{-C}_6\text{H}_3)_4]$  (50 mM) as electrolyte at varying scan rate showing the pseudoreversible oxidation event. Values are referenced to Fc.  $\text{Fc}^*$  was used as the internal standard ( $E_{1/2} -0.545$  V vs  $\text{Fc}^{0/+}$ ).<sup>5</sup>

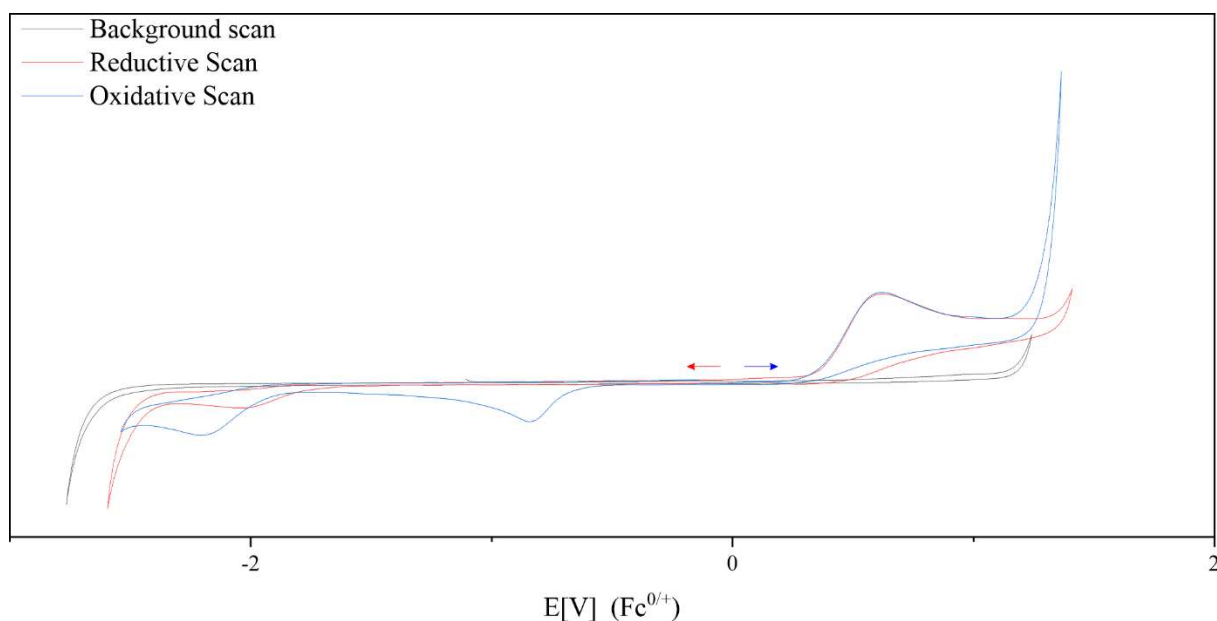

**Figure S24.** Cyclic voltammogram of  $(\text{Trip}_2\text{Bi})_2\text{Naph}$  (**2**) in DCM solution (1 mM) at ambient temperature containing  $[\text{nBu}_4\text{N}][\text{B}(3,5\text{-(CF}_3)_2\text{-C}_6\text{H}_3)_4]$  (50 mM) as electrolyte. The blue graph shows the scan in oxidative direction, while the red graph was performed in reductive direction. Values are referenced to Fc.

## II. Crystallographic Details

**Single-crystal X-ray analyses.** The crystals were mounted on nylon loops in inert oil. Data of **1** (alf\_116\_d) and **3** (alf\_121\_d) were collected on a Bruker AXS D8 Kappa diffractometer with APEX2 detector (mono-chromated Mo $\kappa\alpha$  radiation,  $\lambda = 0.71073 \text{ \AA}$ ) those of **2** (alf\_155) and **4** (alf\_146\_b) on a Bruker AXS D8 Venture diffractometer with Photon II detector (mono-chromated Cu $\kappa\alpha$  radiation,  $\lambda = 1.54178 \text{ \AA}$ , micro-focus source) at 100(2) K. The structures were solved by Direct Methods (SHELXS-2013)<sup>6</sup> and refined anisotropically by full-matrix least-squares on  $F^2$  (SHELXL-2017)<sup>7,8</sup>. Absorption corrections were performed semi-empirically from equivalent reflections on basis of multi-scans (Bruker AXS APEX3). Hydrogen atoms were refined using a riding model or rigid methyl groups. In **2** (alf\_155) an isopropyl group is disordered over two positions. Its bond lengths and angles were restrained to be equal (SADI). The atoms were refined with common displacement parameters (EADP) to which RIGU restraints were applied. In **3** (alf\_121\_d) an isopropyl group is disordered over two positions. Its bond lengths and angles were restrained to be equal (SADI) and RIGU and SIMU restraints were applied to its anisotropic displacement parameters. The high residual electron density in **2** and **4** is likely caused by absorption. Several methods and parameters were tried to improve the absorption correction, however, the residual density could not be reduced any further. The highest residual density maxima in **3** are a straight line with the heavy atoms and evenly spaced thus they are likely artifacts caused by Fourier series truncation.

CCDC-2157418 (**1**, alf\_116\_D), -2157419 (**2**, alf\_155), -2157420 (**3**, alf\_121\_d), and -2157421 (**4**, alf\_146\_b) contain the supplementary crystallographic data for this paper. These data can be obtained free of charge from The Cambridge Crystallographic Data Centre via [www.ccdc.cam.ac.uk/data\\_request/cif](http://www.ccdc.cam.ac.uk/data_request/cif).

**Table S3.** Single crystal X-ray diffraction data of **1-4**.

| <b>Compound<br/>(Identification code)</b>                    | <b>1 (alf_116_Dm)</b>                                             | <b>2 (alf_155m)</b>                                               | <b>3 (alf_121_dm)</b>                                             | <b>4 (alf_146_bm)</b>                                             |
|--------------------------------------------------------------|-------------------------------------------------------------------|-------------------------------------------------------------------|-------------------------------------------------------------------|-------------------------------------------------------------------|
| Empirical formula                                            | C <sub>70</sub> H <sub>98</sub> Sb <sub>2</sub>                   | C <sub>70</sub> H <sub>98</sub> Bi <sub>2</sub>                   | C <sub>79</sub> H <sub>75</sub> BF <sub>20</sub> Sb <sub>2</sub>  | C <sub>40</sub> H <sub>52</sub> Sb <sub>2</sub>                   |
| <i>M</i> [g/mol]                                             | 1182.98                                                           | 1357.44                                                           | 1658.70                                                           | 776.31                                                            |
| Crystal size [mm]                                            | 0.422 x 0.356 x<br>0.184                                          | 0.416 × 0.155 ×<br>0.118                                          | 0.428 × 0.417 ×<br>0.250                                          | 0.312 × 0.230 ×<br>0.104                                          |
| <i>T</i> [K]                                                 | 100(2)                                                            | 100(2)                                                            | 100(2)                                                            | 100(2)                                                            |
| Crystal system                                               | orthorhombic                                                      | monoclinic                                                        | triclinic                                                         | orthorhombic                                                      |
| Space group                                                  | <i>P</i> 2 <sub>1</sub> 2 <sub>1</sub> 2                          | <i>C</i> 2/ <i>c</i>                                              | <i>P</i> $\bar{1}$                                                | <i>Pbca</i>                                                       |
| <i>a</i> [Å]                                                 | 15.8867(7)                                                        | 34.169(3)                                                         | 14.118(3)                                                         | 15.8584(15)                                                       |
| <i>b</i> [Å]                                                 | 14.0109(7)                                                        | 10.4618(8)                                                        | 15.623(3)                                                         | 17.1790(15)                                                       |
| <i>c</i> [Å]                                                 | 14.5536(7)                                                        | 18.2971(14)                                                       | 17.104(3)                                                         | 26.761(2)                                                         |
| $\alpha$ [°]                                                 | 90                                                                | 90                                                                | 82.723(8)                                                         | 90                                                                |
| $\beta$ [°]                                                  | 90                                                                | 110.0432(19)                                                      | 80.545(8)                                                         | 90                                                                |
| $\gamma$ [°]                                                 | 90                                                                | 90                                                                | 78.391(8)                                                         | 90                                                                |
| <i>V</i> [Å <sup>3</sup> ]                                   | 3239.4(3)                                                         | 6144.4(8)                                                         | 3627.9(12)                                                        | 7290.6(11)                                                        |
| <i>Z</i>                                                     | 2                                                                 | 4                                                                 | 2                                                                 | 8                                                                 |
| <i>D</i> <sub>calc</sub> [g·cm <sup>-3</sup> ]               | 1.213                                                             | 1.467                                                             | 1.518                                                             | 1.415                                                             |
| $\mu$ (MoK $\alpha$ ) [mm <sup>-1</sup> ]                    | 0.871                                                             | 11.390 (CuK $\alpha$ )                                            | 0.840                                                             | 11.920                                                            |
| Transmissions                                                | 0.75/0.66                                                         | 0.75/0.44                                                         | 0.75/0.62                                                         | 0.75/0.35                                                         |
| <i>F</i> (000)                                               | 1240                                                              | 2736                                                              | 1672                                                              | 3152                                                              |
| Index ranges                                                 | -26 ≤ <i>h</i> ≤ 26<br>-23 ≤ <i>k</i> ≤ 23<br>-24 ≤ <i>l</i> ≤ 24 | -42 ≤ <i>h</i> ≤ 42<br>-13 ≤ <i>k</i> ≤ 13<br>-20 ≤ <i>l</i> ≤ 22 | -21 ≤ <i>h</i> ≤ 21<br>-24 ≤ <i>k</i> ≤ 24<br>-26 ≤ <i>l</i> ≤ 26 | -16 ≤ <i>h</i> ≤ 19<br>-21 ≤ <i>k</i> ≤ 21<br>-34 ≤ <i>l</i> ≤ 33 |
| $\theta$ <sub>max</sub> [°]                                  | 36.632                                                            | 80.540                                                            | 33.920                                                            | 80.951                                                            |
| Reflections collected                                        | 172477                                                            | 70130                                                             | 230758                                                            | 100079                                                            |
| Independent reflections                                      | 16019                                                             | 6421                                                              | 28346                                                             | 7676                                                              |
| <i>R</i> <sub>int</sub>                                      | 0.0225                                                            | 0.0607                                                            | 0.0494                                                            | 0.0652                                                            |
| Refined parameters                                           | 338                                                               | 338                                                               | 958                                                               | 401                                                               |
| <i>R</i> <sub>1</sub> [ <i>I</i> > 2σ( <i>I</i> )]           | 0.0162                                                            | 0.0491                                                            | 0.0324                                                            | 0.0610                                                            |
| <i>wR</i> <sub>2</sub> [all data]                            | 0.0422                                                            | 0.1341                                                            | 0.0769                                                            | 0.1613                                                            |
| <i>X</i> (Flack)                                             | -0.0183(19)                                                       | -                                                                 | -                                                                 | -                                                                 |
| GooF                                                         | 1.087                                                             | 1.102                                                             | 1.125                                                             | 1.135                                                             |
| $\Delta\rho$ <sub>final</sub> (max/min) [e·Å <sup>-3</sup> ] | 0.980/-0.558                                                      | 6.445/-2.252                                                      | 2.988/-1.085                                                      | 3.216/-1.648                                                      |

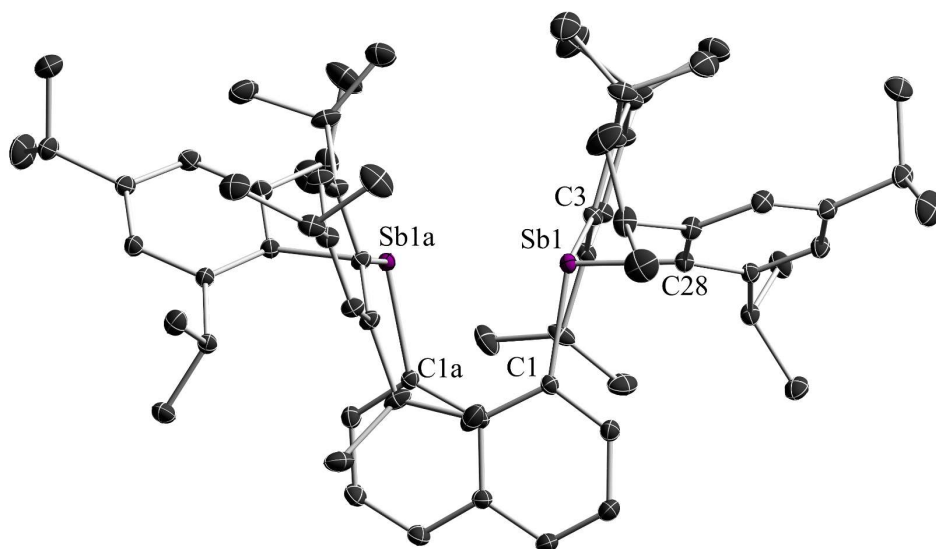

**Figure S25.** Solid-state structure of **1**. Displacement ellipsoids drawn at 50 % probability levels. The H atoms are omitted for clarity.

**Table S4.** Bond lengths [ $\text{\AA}$ ] of **1**.

|           |            |         |            |
|-----------|------------|---------|------------|
| Sb1-C1    | 2.1769(11) | C12-C34 | 1.5240(15) |
| Sb1-C28   | 2.1902(10) | C13-C30 | 1.527(2)   |
| Sb1-C3    | 2.2019(11) | C13-C29 | 1.531(2)   |
| Sb1-Sb1#1 | 3.2327(2)  | C14-C15 | 1.4007(15) |
| C1-C2     | 1.3805(16) | C14-C19 | 1.5205(16) |
| C1-C4     | 1.4447(12) | C15-C16 | 1.3927(17) |
| C2-C7     | 1.4119(17) | C16-C17 | 1.3908(16) |
| C3-C14    | 1.4118(15) | C16-C22 | 1.5147(16) |
| C3-C18    | 1.4167(16) | C17-C18 | 1.3991(16) |
| C4-C5     | 1.433(2)   | C18-C25 | 1.5255(16) |
| C5-C6     | 1.4206(14) | C19-C20 | 1.534(2)   |
| C5-C6#1   | 1.4207(14) | C19-C21 | 1.534(2)   |
| C6-C7     | 1.3676(18) | C22-C24 | 1.527(2)   |
| C8-C9     | 1.3991(17) | C22-C23 | 1.535(2)   |
| C8-C28    | 1.4179(15) | C25-C27 | 1.532(2)   |
| C8-C13    | 1.5252(17) | C25-C26 | 1.533(2)   |
| C9-C10    | 1.3905(17) | C31-C32 | 1.526(2)   |
| C10-C11   | 1.3918(16) | C31-C33 | 1.534(2)   |
| C10-C31   | 1.5169(17) | C34-C36 | 1.5350(17) |
| C11-C12   | 1.4004(15) | C34-C35 | 1.5374(17) |
| C12-C28   | 1.4094(15) |         |            |

**Table S5.** Bond angles [°] of **1**.

|               |            |             |            |             |            |
|---------------|------------|-------------|------------|-------------|------------|
| C1-Sb1-C28    | 101.51(4)  | C9-C8-C13   | 117.29(10) | C17-C18-C25 | 116.13(10) |
| C1-Sb1-C3     | 106.84(4)  | C28-C8-C13  | 123.22(10) | C3-C18-C25  | 124.08(10) |
| C28-Sb1-C3    | 97.64(4)   | C10-C9-C8   | 122.02(10) | C14-C19-C20 | 113.12(11) |
| C1-Sb1-Sb1#1  | 80.89(3)   | C9-C10-C11  | 117.67(10) | C14-C19-C21 | 111.38(11) |
| C28-Sb1-Sb1#1 | 167.59(3)  | C9-C10-C31  | 121.32(10) | C20-C19-C21 | 109.90(10) |
| C3-Sb1-Sb1#1  | 93.23(3)   | C11-C10-C31 | 121.00(11) | C16-C22-C24 | 110.37(11) |
| C2-C1-C4      | 119.58(10) | C10-C11-C12 | 122.43(10) | C16-C22-C23 | 112.29(11) |
| C2-C1-Sb1     | 115.24(8)  | C11-C12-C28 | 119.18(9)  | C24-C22-C23 | 110.96(12) |
| C4-C1-Sb1     | 125.19(8)  | C11-C12-C34 | 117.61(10) | C18-C25-C27 | 111.30(11) |
| C1-C2-C7      | 122.32(11) | C28-C12-C34 | 123.19(9)  | C18-C25-C26 | 111.81(11) |
| C14-C3-C18    | 118.65(10) | C8-C13-C30  | 112.63(12) | C27-C25-C26 | 111.60(11) |
| C14-C3-Sb1    | 127.81(8)  | C8-C13-C29  | 110.79(12) | C12-C28-C8  | 118.95(10) |
| C18-C3-Sb1    | 113.47(8)  | C30-C13-C29 | 110.87(13) | C12-C28-Sb1 | 125.01(7)  |
| C5-C4-C1#1    | 117.12(7)  | C15-C14-C3  | 119.38(10) | C8-C28-Sb1  | 114.17(8)  |
| C5-C4-C1      | 117.12(7)  | C15-C14-C19 | 116.10(10) | C10-C31-C32 | 112.22(12) |
| C1#1-C4-C1    | 125.75(13) | C3-C14-C19  | 124.51(10) | C10-C31-C33 | 110.77(11) |
| C6-C5-C6#1    | 119.07(15) | C16-C15-C14 | 122.53(10) | C32-C31-C33 | 110.86(13) |
| C6-C5-C4      | 120.46(7)  | C17-C16-C15 | 117.51(10) | C12-C34-C36 | 112.51(9)  |
| C6#1-C5-C4    | 120.46(7)  | C17-C16-C22 | 121.86(10) | C12-C34-C35 | 111.29(9)  |
| C7-C6-C5      | 120.92(11) | C15-C16-C22 | 120.59(10) | C36-C34-C35 | 109.40(10) |
| C6-C7-C2      | 119.09(11) | C16-C17-C18 | 122.13(10) |             |            |
| C9-C8-C28     | 119.47(10) | C17-C18-C3  | 119.78(10) |             |            |

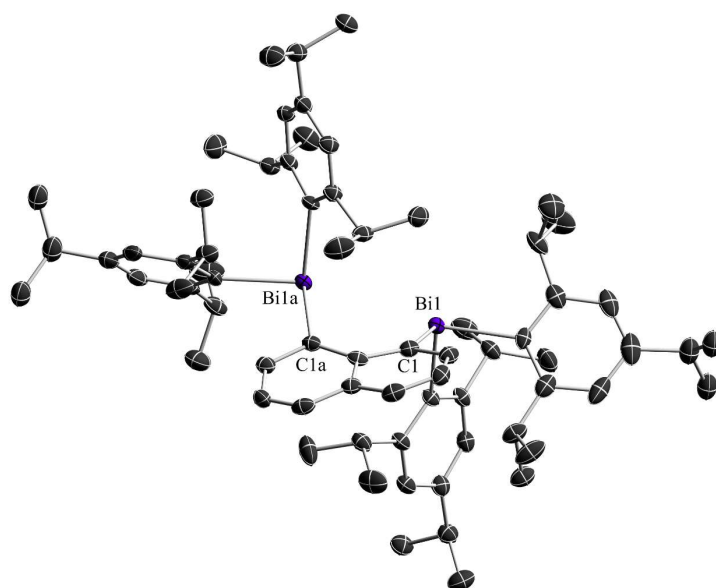

**Figure S26.** Solid-state structure of **2**. Displacement ellipsoids are drawn at a 50 % probability level. The H atoms are omitted for clarity.

**Table S4.** Bond lengths [Å] of **2**.

|           |           |             |           |
|-----------|-----------|-------------|-----------|
| Bi1-C11   | 2.318(4)  | C102-C112   | 1.533(8)  |
| Bi1-C12   | 2.326(5)  | C132-C152   | 1.526(7)  |
| Bi1-C13   | 2.326(5)  | C132-C142   | 1.528(7)  |
| Bi1-Bi1#1 | 3.6742(4) | C13-C23     | 1.409(8)  |
| C11-C21   | 1.380(6)  | C13-C63     | 1.417(8)  |
| C11-C61   | 1.441(5)  | C23-C33     | 1.414(7)  |
| C21-C31   | 1.411(7)  | C23-C73     | 1.522(8)  |
| C31-C41   | 1.356(8)  | C33-C43     | 1.396(10) |
| C41-C51   | 1.416(7)  | C43-C53     | 1.346(11) |
| C51-C61   | 1.435(9)  | C43-C103    | 1.537(11) |
| C12-C62   | 1.403(7)  | C43-C10'3   | 1.66(2)   |
| C12-C22   | 1.408(7)  | C53-C63     | 1.390(8)  |
| C22-C32   | 1.394(7)  | C63-C133    | 1.514(8)  |
| C22-C72   | 1.515(6)  | C73-C83     | 1.539(7)  |
| C32-C42   | 1.409(7)  | C73-C93     | 1.546(7)  |
| C42-C52   | 1.371(7)  | C103-C123   | 1.432(10) |
| C42-C102  | 1.521(7)  | C103-C113   | 1.471(10) |
| C52-C62   | 1.405(7)  | C10'3-C12'3 | 1.429(16) |
| C62-C132  | 1.524(6)  | C10'3-C11'3 | 1.440(15) |
| C72-C82   | 1.525(8)  | C133-C143   | 1.532(7)  |
| C72-C92   | 1.532(7)  | C133-C153   | 1.537(8)  |
| C102-C122 | 1.520(7)  |             |           |



**Table S5.** Bond angles [°] of **2**.

|               |            |                |          |                   |           |
|---------------|------------|----------------|----------|-------------------|-----------|
| C11-Bi1-C12   | 107.53(16) | C22-C32-C42    | 121.8(4) | C43-C33-C23       | 121.4(6)  |
| C11-Bi1-C13   | 96.72(17)  | C52-C42-C32    | 117.4(4) | C53-C43-C33       | 118.3(6)  |
| C12-Bi1-C13   | 92.31(19)  | C52-C42-C102   | 121.1(4) | C53-C43-C103      | 116.4(7)  |
| C11-Bi1-Bi1#1 | 74.73(11)  | C32-C42-C102   | 121.5(4) | C33-C43-C103      | 125.3(7)  |
| C12-Bi1-Bi1#1 | 102.87(13) | C42-C52-C62    | 122.7(4) | C53-C43-C10'3     | 145.7(10) |
| C13-Bi1-Bi1#1 | 164.20(13) | C12-C62-C52    | 119.1(4) | C33-C43-C10'3     | 95.2(10)  |
| C21-C11-C61   | 119.2(4)   | C12-C62-C132   | 123.9(4) | C43-C53-C63       | 123.2(6)  |
| C21-C11-Bi1   | 113.3(3)   | C52-C62-C132   | 117.0(4) | C53-C63-C13       | 119.5(5)  |
| C61-C11-Bi1   | 127.5(3)   | C22-C72-C82    | 113.4(4) | C53-C63-C133      | 116.3(5)  |
| C11-C21-C31   | 121.7(5)   | C22-C72-C92    | 110.5(4) | C13-C63-C133      | 124.1(5)  |
| C41-C31-C21   | 119.8(5)   | C82-C72-C92    | 110.4(5) | C23-C73-C83       | 111.7(4)  |
| C31-C41-C51   | 120.5(5)   | C122-C102-C42  | 112.2(4) | C23-C73-C93       | 110.2(5)  |
| C41#1-C51-C41 | 119.8(7)   | C122-C102-C112 | 110.4(4) | C83-C73-C93       | 108.8(4)  |
| C41#1-C51-C61 | 120.1(3)   | C42-C102-C112  | 112.1(4) | C123-C103-C113    | 124.6(8)  |
| C41-C51-C61   | 120.1(3)   | C62-C132-C152  | 113.2(4) | C123-C103-C43     | 112.9(7)  |
| C51-C61-C11   | 116.9(3)   | C62-C132-C142  | 109.7(4) | C113-C103-C43     | 110.3(7)  |
| C51-C61-C11#1 | 116.9(3)   | C152-C132-C142 | 111.3(5) | C12'3-C10'3-C11'3 | 120.4(17) |
| C11-C61-C11#1 | 126.3(6)   | C23-C13-C63    | 118.4(5) | C12'3-C10'3-C43   | 117.3(15) |
| C62-C12-C22   | 119.2(4)   | C23-C13-Bi1    | 124.4(4) | C11'3-C10'3-C43   | 120.0(15) |
| C62-C12-Bi1   | 115.3(3)   | C63-C13-Bi1    | 116.7(4) | C63-C133-C143     | 111.1(5)  |
| C32-C22-C12   | 119.4(4)   | C13-C23-C33    | 119.1(5) | C63-C133-C153     | 112.5(5)  |
| C32-C22-C72   | 118.4(4)   | C13-C23-C73    | 123.4(5) | C143-C133-C153    | 109.5(5)  |
| C12-C22-C72   | 122.2(4)   | C33-C23-C73    | 117.4(5) |                   |           |

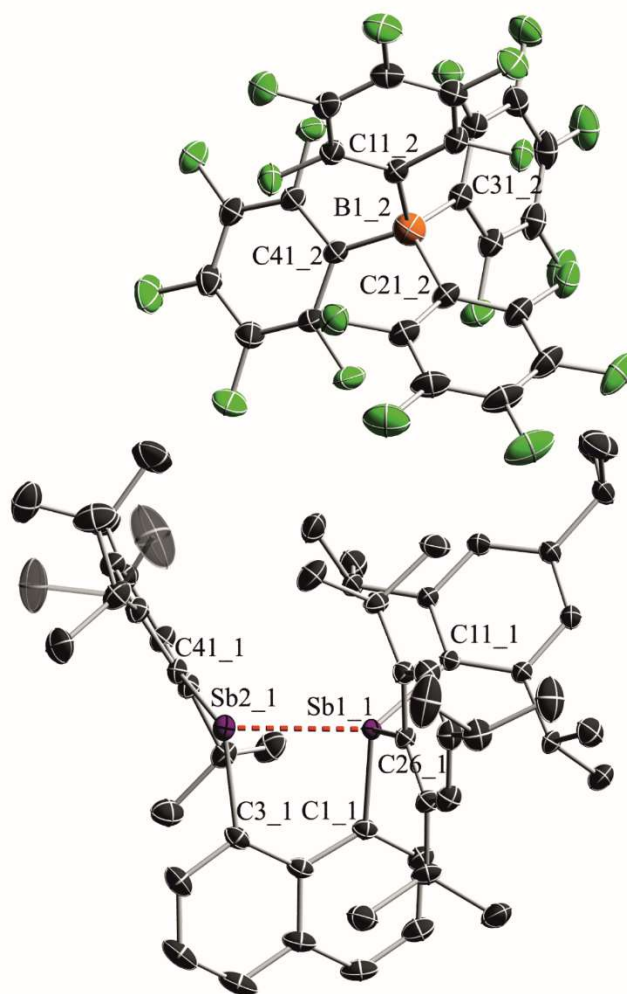

**Figure S27.** Solid-state structure of **3**. Displacement ellipsoids drawn at 50 % probability levels. The hydrogen atoms are omitted for clarity.

**Table S6.** Bond lengths [ $\text{\AA}$ ] of **3**.

|           |            |           |          |           |          |
|-----------|------------|-----------|----------|-----------|----------|
| Sb11-C11  | 2.1170(15) | C291-C351 | 1.518(2) | F332-C342 | 1.345(2) |
| Sb11-C111 | 2.1367(15) | C301-C311 | 1.397(2) | F342-C352 | 1.345(2) |
| Sb11-C261 | 2.1465(15) | C311-C381 | 1.517(2) | F352-C362 | 1.348(2) |
| Sb11-Sb21 | 2.7980(4)  | C321-C341 | 1.532(2) | F412-C422 | 1.349(2) |
| Sb21-C31  | 2.1647(17) | C321-C331 | 1.534(3) | F422-C432 | 1.345(2) |
| Sb21-C411 | 2.1708(16) | C351-C361 | 1.506(3) | F432-C442 | 1.344(2) |
| C11-C101  | 1.375(2)   | C351-C371 | 1.512(3) | F442-C452 | 1.341(2) |
| C11-C21   | 1.428(2)   | C381-C401 | 1.531(3) | F452-C462 | 1.347(2) |
| C21-C71   | 1.430(2)   | C381-C391 | 1.536(3) | C112-C162 | 1.390(2) |
| C21-C31   | 1.433(2)   | C411-C461 | 1.407(2) | C112-C122 | 1.397(2) |
| C31-C41   | 1.381(2)   | C411-C421 | 1.421(2) | C112-B12  | 1.651(3) |
| C41-C51   | 1.411(3)   | C421-C431 | 1.391(2) | C122-C132 | 1.381(2) |
| C51-C61   | 1.362(3)   | C421-C471 | 1.524(2) | C132-C142 | 1.375(3) |
| C61-C71   | 1.419(3)   | C431-C441 | 1.391(2) | C142-C152 | 1.376(3) |

|           |          |                       |            |           |          |
|-----------|----------|-----------------------|------------|-----------|----------|
| C71-C81   | 1.415(3) | C441-C451             | 1.388(2)   | C152-C162 | 1.390(2) |
| C81-C91   | 1.366(3) | C441-C501             | 1.517(2)   | C212-C222 | 1.390(2) |
| C91-C101  | 1.410(2) | C451-C461             | 1.397(2)   | C212-C262 | 1.391(3) |
| C111-C121 | 1.405(2) | C461-C531             | 1.512(2)   | C212-B12  | 1.651(3) |
| C111-C161 | 1.411(2) | C471-C49 <sup>1</sup> | 1.468(14)  | C222-C232 | 1.385(3) |
| C121-C131 | 1.396(2) | C471-C481             | 1.507(3)   | C232-C242 | 1.366(4) |
| C121-C171 | 1.519(2) | C471-C491             | 1.536(3)   | C242-C252 | 1.381(3) |
| C131-C141 | 1.393(2) | C471-C48 <sup>1</sup> | 1.581(13)  | C252-C262 | 1.380(3) |
| C141-C151 | 1.389(2) | C501-C521             | 1.516(3)   | C312-C322 | 1.387(3) |
| C141-C201 | 1.515(2) | C501-C511             | 1.524(3)   | C312-C362 | 1.392(2) |
| C151-C161 | 1.400(2) | C531-C551             | 1.530(3)   | C312-B12  | 1.652(3) |
| C161-C231 | 1.522(2) | C531-C541             | 1.538(3)   | C322-C332 | 1.388(3) |
| C171-C181 | 1.527(3) | F122-C122             | 1.3471(19) | C332-C342 | 1.372(3) |
| C171-C191 | 1.529(3) | F132-C132             | 1.341(2)   | C342-C352 | 1.372(3) |
| C201-C221 | 1.525(3) | F142-C142             | 1.342(2)   | C352-C362 | 1.383(3) |
| C201-C211 | 1.528(3) | F152-C152             | 1.339(2)   | C412-C462 | 1.389(2) |
| C231-C251 | 1.522(2) | F162-C162             | 1.347(2)   | C412-C422 | 1.395(2) |
| C231-C241 | 1.532(2) | F212-C222             | 1.346(2)   | C412-B12  | 1.653(3) |
| C261-C311 | 1.406(2) | F222-C232             | 1.350(3)   | C422-C432 | 1.381(2) |
| C261-C271 | 1.412(2) | F232-C242             | 1.343(2)   | C432-C442 | 1.374(3) |
| C271-C281 | 1.392(2) | F242-C252             | 1.340(3)   | C442-C452 | 1.375(3) |
| C271-C321 | 1.519(2) | F252-C262             | 1.350(2)   | C452-C462 | 1.386(3) |
| C281-C291 | 1.388(2) | F312-C322             | 1.348(2)   |           |          |
| C291-C301 | 1.385(2) | F322-C332             | 1.343(2)   |           |          |

**Table S7.** Bond angles [°] of **3**.

|                |            |                |            |                |            |
|----------------|------------|----------------|------------|----------------|------------|
| C11-Sb11-C111  | 113.07(6)  | C281-C291-C351 | 121.84(16) | C222-C212-B12  | 126.72(17) |
| C11-Sb11-C261  | 113.33(6)  | C291-C301-C311 | 122.66(15) | C262-C212-B12  | 118.79(15) |
| C111-Sb11-C261 | 102.86(6)  | C301-C311-C261 | 117.67(14) | F212-C222-C232 | 114.62(17) |
| C11-Sb11-Sb21  | 91.26(4)   | C301-C311-C381 | 117.72(14) | F212-C222-C212 | 121.95(17) |
| C111-Sb11-Sb21 | 137.25(4)  | C261-C311-C381 | 124.57(14) | C232-C222-C212 | 123.4(2)   |
| C261-Sb11-Sb21 | 98.29(4)   | C271-C321-C341 | 112.48(14) | F222-C232-C242 | 120.67(19) |
| C31-Sb21-C411  | 107.08(6)  | C271-C321-C331 | 111.18(15) | F222-C232-C222 | 119.2(2)   |
| C31-Sb21-Sb11  | 80.51(4)   | C341-C321-C331 | 111.43(15) | C242-C232-C222 | 120.1(2)   |
| C411-Sb21-Sb11 | 106.31(4)  | C361-C351-C371 | 110.98(19) | F232-C242-C232 | 120.9(2)   |
| C101-C11-C21   | 121.81(14) | C361-C351-C291 | 113.21(16) | F232-C242-C252 | 119.9(2)   |
| C101-C11-Sb11  | 122.65(12) | C371-C351-C291 | 110.91(16) | C232-C242-C252 | 119.23(18) |
| C21-C11-Sb11   | 115.24(11) | C311-C381-C401 | 113.30(15) | F242-C252-C262 | 120.8(2)   |
| C11-C21-C71    | 116.93(15) | C311-C381-C391 | 110.32(15) | F242-C252-C242 | 120.19(19) |
| C11-C21-C31    | 124.35(14) | C401-C381-C391 | 110.94(15) | C262-C252-C242 | 119.0(2)   |
| C71-C21-C31    | 118.72(14) | C461-C411-C421 | 120.11(14) | F252-C262-C252 | 115.97(18) |
| C41-C31-C21    | 119.49(15) | C461-C411-Sb21 | 126.25(11) | F252-C262-C212 | 119.62(16) |
| C41-C31-Sb21   | 114.95(13) | C421-C411-Sb21 | 113.47(11) | C252-C262-C212 | 124.40(19) |

|                |            |                  |            |                |            |
|----------------|------------|------------------|------------|----------------|------------|
| C21-C31-Sb21   | 125.54(11) | C431-C421-C411   | 118.42(15) | C322-C312-C362 | 113.49(16) |
| C31-C41-C51    | 121.21(18) | C431-C421-C471   | 119.20(15) | C322-C312-B12  | 126.62(15) |
| C61-C51-C41    | 120.26(17) | C411-C421-C471   | 122.33(15) | C362-C312-B12  | 119.73(16) |
| C51-C61-C71    | 120.91(17) | C441-C431-C421   | 122.29(15) | F312-C322-C312 | 121.37(16) |
| C81-C71-C61    | 121.29(16) | C451-C441-C431   | 118.18(15) | F312-C322-C332 | 114.89(17) |
| C81-C71-C21    | 119.49(16) | C451-C441-C501   | 120.58(15) | C312-C322-C332 | 123.74(17) |
| C61-C71-C21    | 119.22(17) | C431-C441-C501   | 121.21(15) | F322-C332-C342 | 120.02(18) |
| C91-C81-C71    | 121.71(16) | C441-C451-C461   | 122.19(15) | F322-C332-C322 | 120.04(19) |
| C81-C91-C101   | 119.52(17) | C451-C461-C411   | 118.61(14) | C342-C332-C322 | 119.94(19) |
| C11-C101-C91   | 120.20(16) | C451-C461-C531   | 119.11(14) | F332-C342-C332 | 120.7(2)   |
| C121-C111-C161 | 121.53(13) | C411-C461-C531   | 122.19(14) | F332-C342-C352 | 120.3(2)   |
| C121-C111-Sb11 | 119.49(10) | C49'1-C471-C421  | 119.2(13)  | C332-C342-C352 | 118.98(18) |
| C161-C111-Sb11 | 117.86(10) | C481-C471-C421   | 110.66(16) | F342-C352-C342 | 119.99(18) |
| C131-C121-C111 | 117.90(14) | C481-C471-C491   | 109.91(19) | F342-C352-C362 | 120.6(2)   |
| C131-C121-C171 | 118.45(14) | C421-C471-C491   | 114.42(16) | C342-C352-C362 | 119.36(18) |
| C111-C121-C171 | 123.63(13) | C49'1-C471-C48'1 | 110.0(14)  | F352-C362-C352 | 116.45(17) |
| C141-C131-C121 | 122.31(15) | C421-C471-C48'1  | 107.9(8)   | F352-C362-C312 | 119.15(16) |
| C151-C141-C131 | 118.04(14) | C521-C501-C441   | 109.80(17) | C352-C362-C312 | 124.39(19) |
| C151-C141-C201 | 120.11(14) | C521-C501-C511   | 110.6(2)   | C462-C412-C422 | 112.74(15) |
| C131-C141-C201 | 121.81(15) | C441-C501-C511   | 113.11(16) | C462-C412-B12  | 127.53(15) |
| C141-C151-C161 | 122.53(14) | C461-C531-C551   | 115.00(15) | C422-C412-B12  | 119.55(15) |
| C151-C161-C111 | 117.45(13) | C461-C531-C541   | 109.91(14) | F412-C422-C432 | 116.00(15) |
| C151-C161-C231 | 117.79(13) | C551-C531-C541   | 109.85(15) | F412-C422-C412 | 119.25(15) |
| C111-C161-C231 | 124.69(13) | C162-C112-C122   | 113.55(15) | C432-C422-C412 | 124.74(16) |
| C121-C171-C181 | 112.18(14) | C162-C112-B12    | 127.48(15) | F422-C432-C442 | 119.49(16) |
| C121-C171-C191 | 111.04(14) | C122-C112-B12    | 118.69(14) | F422-C432-C422 | 120.88(17) |
| C181-C171-C191 | 109.83(15) | F122-C122-C132   | 116.09(15) | C442-C432-C422 | 119.63(17) |
| C141-C201-C221 | 113.24(16) | F122-C122-C112   | 119.08(15) | F432-C442-C432 | 120.57(18) |
| C141-C201-C211 | 109.45(17) | C132-C122-C112   | 124.82(16) | F432-C442-C452 | 120.88(18) |
| C221-C201-C211 | 110.68(18) | F132-C132-C142   | 119.95(17) | C432-C442-C452 | 118.54(17) |
| C161-C231-C251 | 112.69(14) | F132-C132-C122   | 121.23(17) | F442-C452-C442 | 119.20(18) |
| C161-C231-C241 | 109.82(14) | C142-C132-C122   | 118.80(17) | F442-C452-C462 | 120.84(19) |
| C251-C231-C241 | 110.89(14) | F142-C142-C132   | 120.21(18) | C442-C452-C462 | 119.95(18) |
| C311-C261-C271 | 121.05(13) | F142-C142-C152   | 120.36(17) | F452-C462-C452 | 114.77(16) |
| C311-C261-Sb11 | 124.31(11) | C132-C142-C152   | 119.42(16) | F452-C462-C412 | 120.95(16) |
| C271-C261-Sb11 | 114.64(10) | F152-C152-C142   | 119.78(16) | C452-C462-C412 | 124.28(17) |
| C281-C271-C261 | 118.27(14) | F152-C152-C162   | 120.27(17) | C112-B12-C212  | 100.46(13) |
| C281-C271-C321 | 117.59(14) | C142-C152-C162   | 119.95(16) | C112-B12-C312  | 112.42(14) |
| C261-C271-C321 | 124.14(13) | F162-C162-C152   | 115.47(15) | C212-B12-C312  | 113.81(13) |
| C291-C281-C271 | 122.00(15) | F162-C162-C112   | 121.15(15) | C112-B12-C412  | 114.02(13) |
| C301-C291-C281 | 118.30(15) | C152-C162-C112   | 123.38(16) | C212-B12-C412  | 113.65(14) |
| C301-C291-C351 | 119.85(16) | C222-C212-C262   | 113.82(17) | C312-B12-C412  | 102.97(13) |

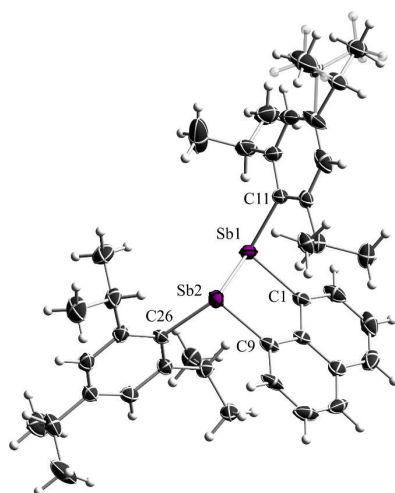

**Figure S28.** Solid-state structure of **4**. Displacement ellipsoids are drawn at a 50 % probability levels.

**Table S8.** Bond lengths [Å] of **4**.

|          |           |          |           |
|----------|-----------|----------|-----------|
| Sb1-C1   | 2.149(6)  | C16-C23  | 1.511(9)  |
| Sb1-C11  | 2.196(6)  | C17-C19  | 1.520(11) |
| Sb1-Sb2  | 2.7991(6) | C17-C18  | 1.526(13) |
| Sb2-C9   | 2.153(6)  | C20-C21  | 1.487(10) |
| Sb2-C26  | 2.192(6)  | C20-C22  | 1.508(10) |
| C1-C2    | 1.391(9)  | C20'-C22 | 1.447(14) |
| C1-C10   | 1.440(8)  | C20'-C21 | 1.480(14) |
| C2-C3    | 1.393(10) | C23-C24  | 1.530(9)  |
| C3-C4    | 1.349(12) | C23-C25  | 1.534(9)  |
| C4-C5    | 1.424(10) | C26-C27  | 1.408(8)  |
| C5-C6    | 1.411(10) | C26-C31  | 1.411(8)  |
| C5-C10   | 1.422(8)  | C27-C28  | 1.390(8)  |
| C6-C7    | 1.373(12) | C27-C32  | 1.525(8)  |
| C7-C8    | 1.401(10) | C28-C29  | 1.380(9)  |
| C8-C9    | 1.392(8)  | C29-C30  | 1.397(9)  |
| C9-C10   | 1.426(8)  | C29-C35  | 1.520(9)  |
| C11-C16  | 1.409(9)  | C30-C31  | 1.387(9)  |
| C11-C12  | 1.411(9)  | C31-C38  | 1.535(8)  |
| C12-C13  | 1.391(10) | C32-C34  | 1.524(8)  |
| C12-C17  | 1.539(10) | C32-C33  | 1.535(9)  |
| C13-C14  | 1.391(12) | C35-C36  | 1.517(11) |
| C14-C15  | 1.369(11) | C35-C37  | 1.518(12) |
| C14-C20' | 1.54(2)   | C38-C40  | 1.520(10) |
| C14-C20  | 1.554(10) | C38-C39  | 1.530(9)  |
| C15-C16  | 1.397(9)  |          |           |

**Table S9.** Bond angles [°] of **4**.

|             |            |              |           |             |          |
|-------------|------------|--------------|-----------|-------------|----------|
| C1-Sb1-C11  | 100.7(2)   | C16-C11-Sb1  | 124.5(4)  | C16-C23-C25 | 112.1(5) |
| C1-Sb1-Sb2  | 86.18(16)  | C12-C11-Sb1  | 116.4(5)  | C24-C23-C25 | 111.4(5) |
| C11-Sb1-Sb2 | 100.81(17) | C13-C12-C11  | 118.8(7)  | C27-C26-C31 | 119.6(5) |
| C9-Sb2-C26  | 99.9(2)    | C13-C12-C17  | 119.2(6)  | C27-C26-Sb2 | 124.5(4) |
| C9-Sb2-Sb1  | 85.91(15)  | C11-C12-C17  | 122.0(6)  | C31-C26-Sb2 | 115.4(4) |
| C26-Sb2-Sb1 | 102.91(15) | C14-C13-C12  | 122.6(7)  | C28-C27-C26 | 118.5(5) |
| C2-C1-C10   | 119.1(6)   | C15-C14-C13  | 117.8(6)  | C28-C27-C32 | 117.9(5) |
| C2-C1-Sb1   | 118.4(5)   | C15-C14-C20' | 143.2(11) | C26-C27-C32 | 123.6(5) |
| C10-C1-Sb1  | 122.3(4)   | C13-C14-C20' | 98.2(11)  | C29-C28-C27 | 123.0(6) |
| C1-C2-C3    | 122.0(6)   | C15-C14-C20  | 115.6(8)  | C28-C29-C30 | 117.7(6) |
| C4-C3-C2    | 120.1(6)   | C13-C14-C20  | 126.5(8)  | C28-C29-C35 | 123.0(6) |
| C3-C4-C5    | 121.0(6)   | C14-C15-C16  | 122.2(7)  | C30-C29-C35 | 119.3(6) |
| C6-C5-C10   | 118.3(6)   | C15-C16-C11  | 119.5(6)  | C31-C30-C29 | 121.8(6) |
| C6-C5-C4    | 121.8(6)   | C15-C16-C23  | 116.8(6)  | C30-C31-C26 | 119.3(5) |
| C10-C5-C4   | 119.8(6)   | C11-C16-C23  | 123.7(5)  | C30-C31-C38 | 118.9(5) |
| C7-C6-C5    | 121.8(6)   | C19-C17-C18  | 111.1(7)  | C26-C31-C38 | 121.7(5) |
| C6-C7-C8    | 119.6(6)   | C19-C17-C12  | 113.1(6)  | C34-C32-C27 | 113.5(5) |
| C9-C8-C7    | 121.2(6)   | C18-C17-C12  | 110.1(8)  | C34-C32-C33 | 109.8(5) |
| C8-C9-C10   | 119.1(6)   | C21-C20-C22  | 113.8(8)  | C27-C32-C33 | 111.2(5) |
| C8-C9-Sb2   | 118.0(5)   | C21-C20-C14  | 112.0(7)  | C36-C35-C37 | 110.5(7) |
| C10-C9-Sb2  | 122.9(4)   | C22-C20-C14  | 108.4(7)  | C36-C35-C29 | 111.5(6) |
| C5-C10-C9   | 119.8(5)   | C22-C20'-C21 | 118.0(13) | C37-C35-C29 | 112.1(6) |
| C5-C10-C1   | 117.9(5)   | C22-C20'-C14 | 112.2(13) | C40-C38-C39 | 110.3(6) |
| C9-C10-C1   | 122.2(5)   | C21-C20'-C14 | 113.0(12) | C40-C38-C31 | 110.1(6) |
| C16-C11-C12 | 119.0(6)   | C16-C23-C24  | 112.3(5)  | C39-C38-C31 | 114.7(6) |

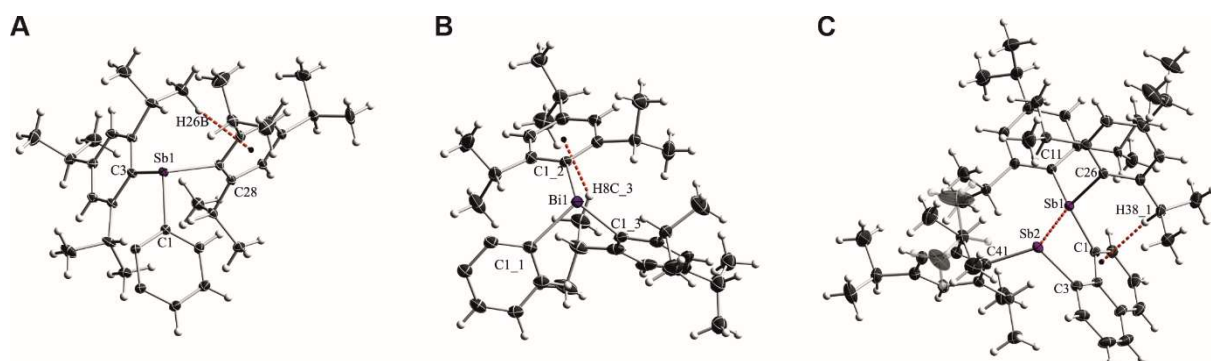**Figure S29.** Observed intramolecular CH- $\pi$  contacts in **1** (A), **2** (B) and **3** (C).

### III. Computational Details

All calculations were performed by using the program packages Gaussian 16<sup>9</sup>, Amsterdam Density Functional<sup>10</sup> (ADF) and AIMAll<sup>11</sup>. The geometrical parameters of all stationary points were optimized by means of the density functional B3LYP<sup>12</sup> together with the dispersion correction with Becke-Johnson damping<sup>13</sup> (D3BJ) using Gaussian 16. The basis set def2-TZVP was applied. For all structures C1 symmetry was applied. Frequency calculations were carried out at each of the stationary points to verify the nature of the stationary point. It turned out that all stationary states except of **1** have none imaginary frequency. However, the negative frequency in **1** has a mode below 1.6 cm<sup>-1</sup>. Natural bond orbital analysis was performed using the NBO<sup>14</sup> version 3.1 implemented in Gaussian 16. The bond energy analysis calculations<sup>15</sup> (B3LYP-D3BJ/TZP) were carried out using Amsterdam Density Functional (ADF). Quantum theory of atoms in molecules (QTAIM)<sup>16</sup> analyses (B3LYP-D3BJ/TZP and B3LYP-D3BJ/def2-TZVP) were performed using Amsterdam Density Functional (ADF) and AIMAll. Interacting quantum atoms (IQA)<sup>17</sup> calculations were carried out using ADF.

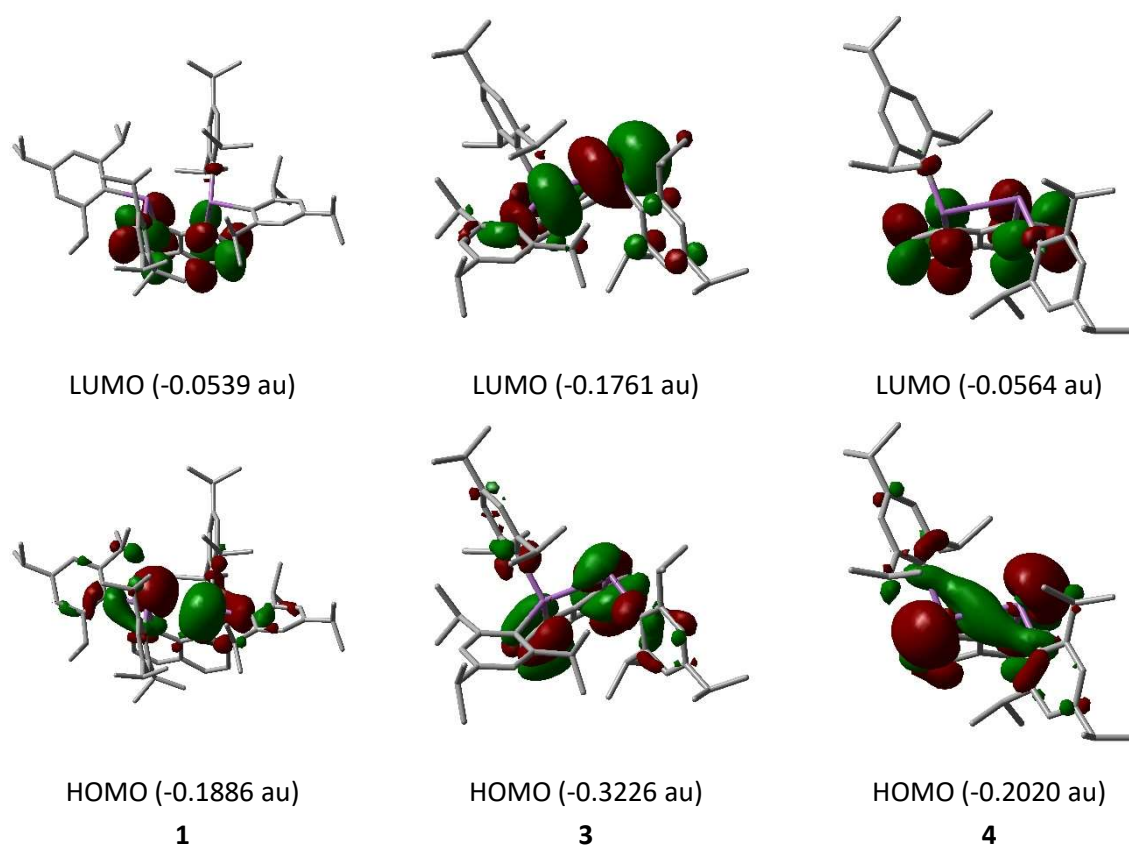

**Figure S30.** Selected orbitals of **1** (left), **3** (middle), and **4** (right) calculated at B3LYP-D3BJ/def2-TZVP level of theory (isovalue 0.03). Hydrogen atoms are omitted for clarity.

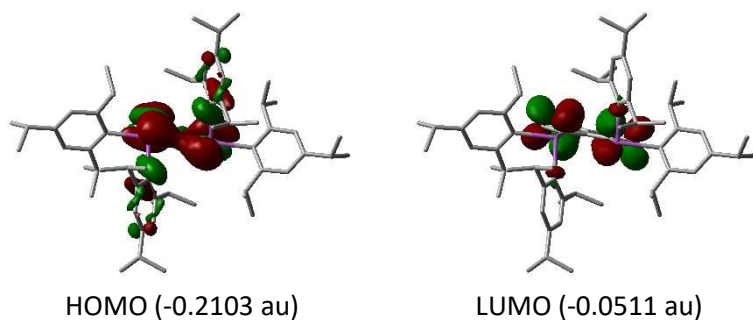

**Figure S31.** Selected orbitals of **2** calculated at B3LYP-D3BJ/def2-TZVP level of theory (isovalue 0.03).

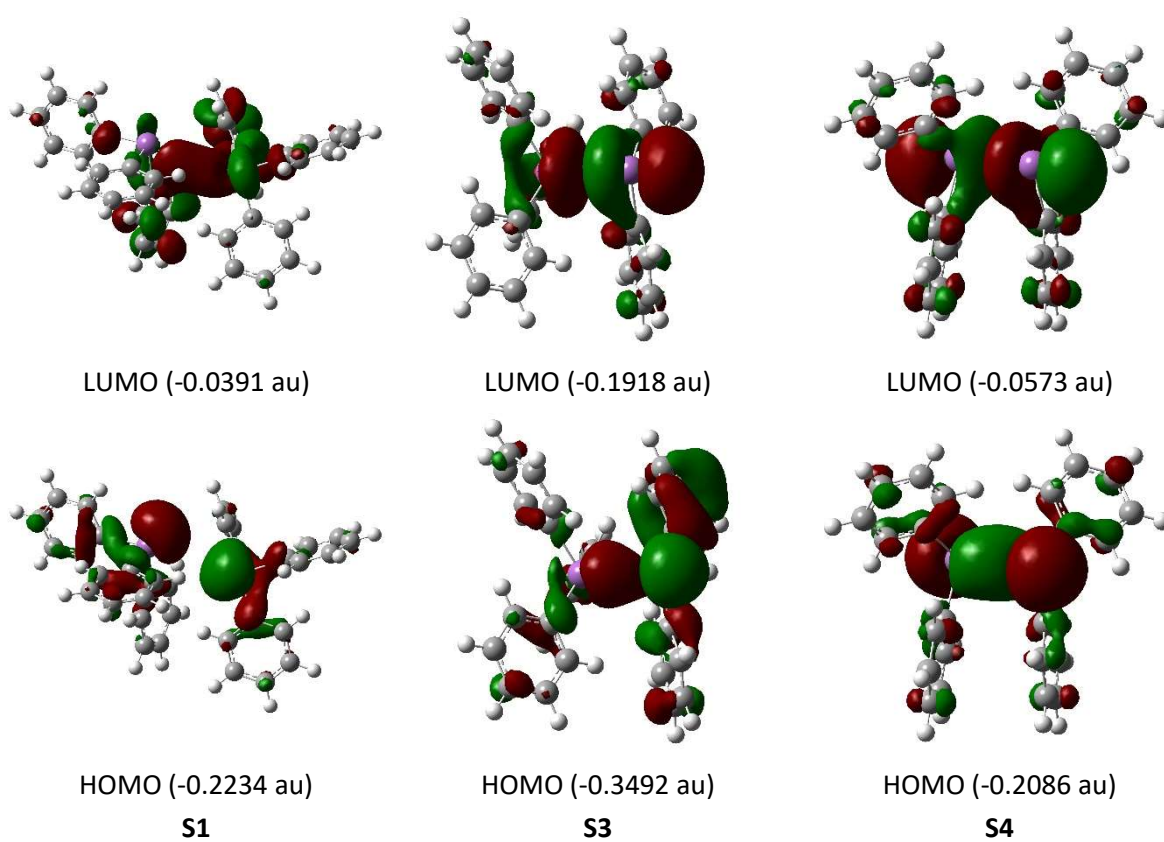

**Figure S32.** Selected orbitals of **S1** (left), **S3** (middle), and **S4** (right) calculated at B3LYP-D3BJ/def2-TZVP level of theory (isovalue 0.03).



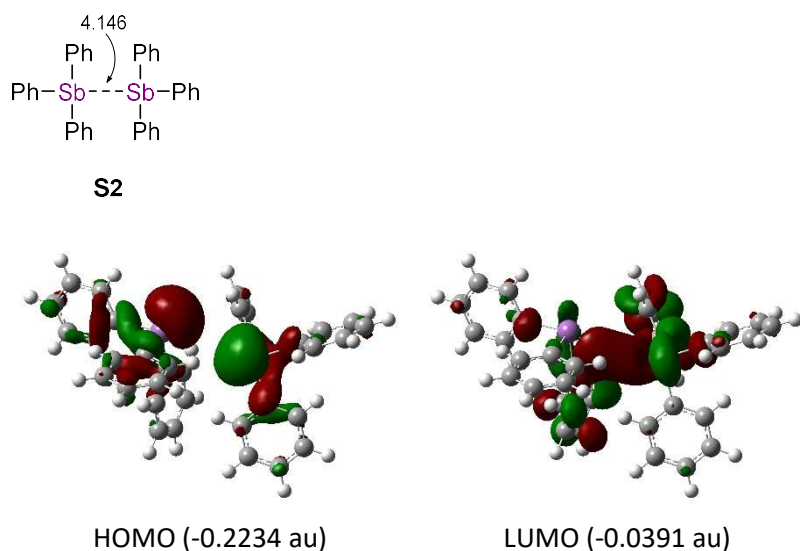

**Figure S33.** Selected orbitals of **S2** calculated at B3LYP-D3BJ/def2-TZVP level of theory (isovalue 0.03).

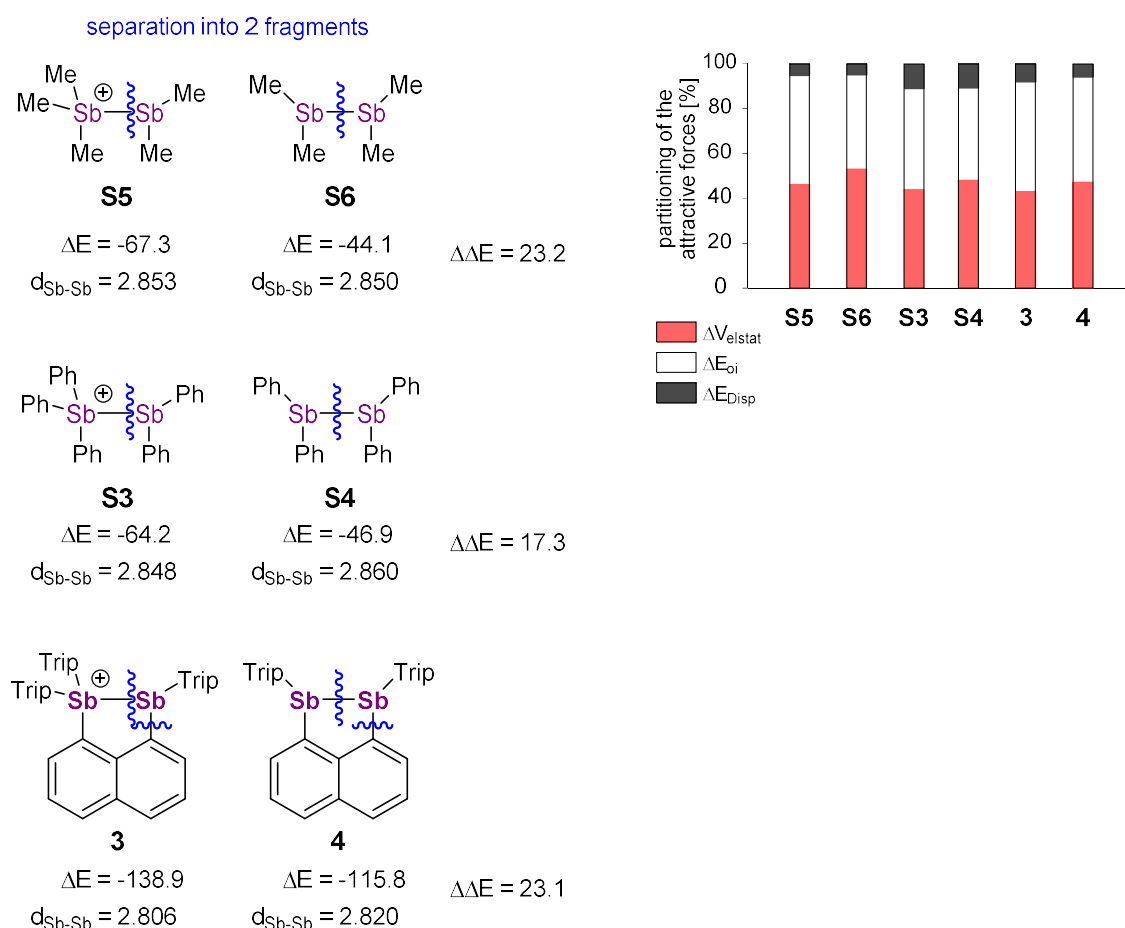

**Figure S34.** Calculated (B3LYP-D3BJ/def2-TZVP) Sb...Sb distances [Å] for **S3-S6**, **3** and **4**. The percentage contributions of the attractive forces ( $\Delta V_{\text{elstat}}$ ,  $\Delta E_{\text{oi}}$  and  $\Delta E_{\text{Disp}}$ ) and the total binding energies ( $\Delta E$  in kcal mol<sup>-1</sup>) between the pictured fragments stem from bond energy analysis calculations (B3LYP-D3BJ/TZP).

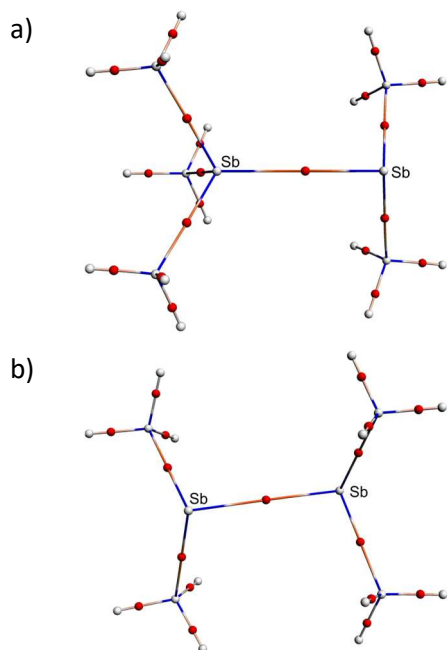

**Figure S35.** Molecular graphs of **S5** (a) and **S6** (b) showing the bond paths (lines) and the different critical points: nuclear (white dots) and bond (red dots) critical points (B3LYP-D3BJ/TZP).

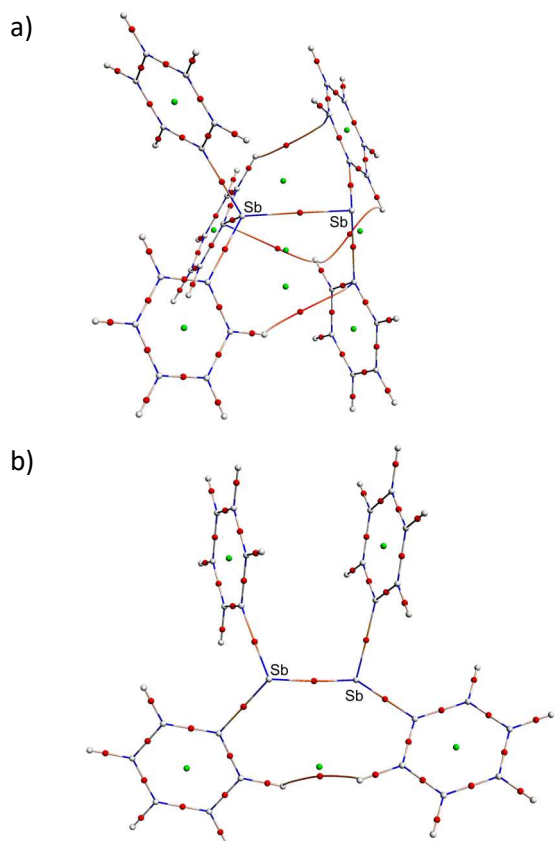

**Figure S36.** Molecular graphs of **S3** (a) and **S4** (b) showing the bond paths (lines) and the different critical points: nuclear (white dots), bond (red dots) and ring (green dots) critical points (B3LYP-D3BJ/TZP).

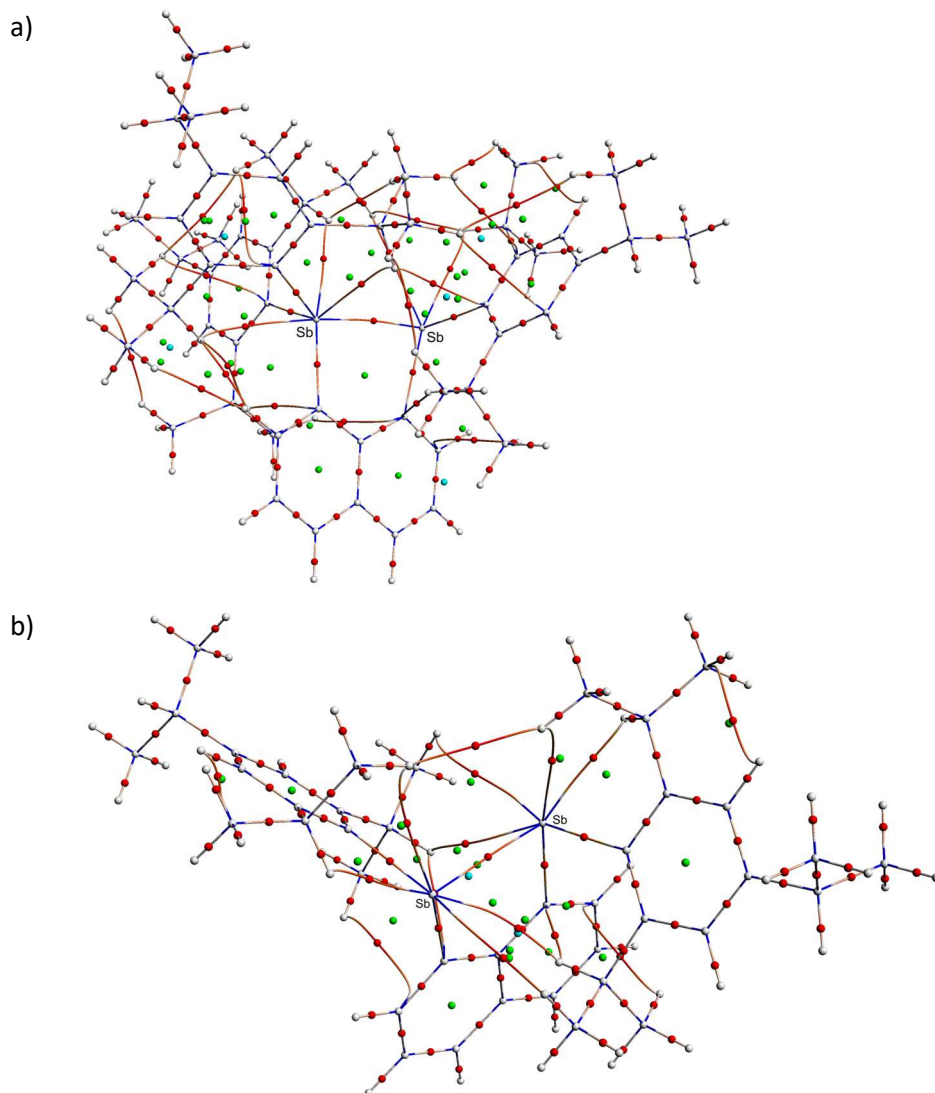

**Figure S37.** Molecular graphs of **3** (a) and **4** (b) showing the bond paths (lines) as well as the nuclear (white dots), bond (red dots), ring (green dots) and cage (blue dots) critical points (B3LYP-D3BJ/TZP).

**Table S10.** Sb...Sb distances [Å] and distances [Å] between the bond critical points (BCP) of the Sb--Sb interaction and the Sb atoms in **S3-S6**, **3** and **4** (B3LYP-D3BJ/TZP).

|           | $d_{(\text{Sb1-Sb2})}$ [Å] | $d_{(\text{Sb1-BCP})}$ [Å] | $d_{(\text{BCP-Sb2})}$ [Å] | $\alpha_{(\text{Sb1-BCP-Sb2})}$ [°] |
|-----------|----------------------------|----------------------------|----------------------------|-------------------------------------|
| <b>S5</b> | 2.853                      | 1.360                      | 1.497                      | 174                                 |
| <b>S6</b> | 2.850                      | 1.425                      | 1.425                      | 179                                 |
| <b>S3</b> | 2.848                      | 1.134                      | 1.767                      | 157                                 |
| <b>S4</b> | 2.860                      | 1.440                      | 1.440                      | 167                                 |
| <b>3</b>  | 2.806                      | 1.114                      | 1.771                      | 152                                 |
| <b>4</b>  | 2.820                      | 1.395                      | 1.425                      | 179                                 |

**Table S11.** Topological and energetic properties of the electron density  $\rho(\mathbf{r})$  calculated at the bond critical points of the Sb--Sb interaction for **S3-S6**, **3** and **4**. The electron density ( $\rho_{\text{CP}}$ ), the Laplacian of the electron density ( $\nabla^2\rho_{\text{CP}}$ ), the electron kinetic ( $G_{\text{CP}}$ ), potential ( $V_{\text{CP}}$ ) and total ( $H_{\text{CP}}$ ) energy densities at the critical points are given in a.u. (B3LYP-D3BJ/TZP).

|           | $\rho_{\text{CP}}$ | $\nabla^2\rho_{\text{CP}}$ | $G_{\text{CP}}$ | $V_{\text{CP}}$ | $H_{\text{CP}}$ |
|-----------|--------------------|----------------------------|-----------------|-----------------|-----------------|
| <b>S5</b> | 0.05676898         | -0.00116968                | 0.02388120      | -0.04805483     | -0.02417362     |
| <b>S6</b> | 0.05943471         | -0.01539731                | 0.02342353      | -0.05069639     | -0.02727286     |
| <b>S3</b> | 0.05742284         | -0.00369247                | 0.02392469      | -0.04877250     | -0.02484781     |
| <b>S4</b> | 0.05804408         | -0.01390003                | 0.02266751      | -0.04881002     | -0.02614252     |
| <b>3</b>  | 0.06050129         | -0.00762143                | 0.02550149      | -0.05290833     | -0.02740684     |
| <b>4</b>  | 0.06116809         | -0.01641720                | 0.02452909      | -0.05316248     | -0.02863339     |

**Table S12.** Interaction energies ( $V_{\text{inter(Total)}}$ ) between the two Sb atoms in **S3-S6**, **3** and **4** as well as the covalent and ionic part (B3LYP-D3BJ/TZP). The values are given in kcal mol<sup>-1</sup>.

|           | $V_{\text{inter(Total)}}$ | ionic part | covalent part |
|-----------|---------------------------|------------|---------------|
| <b>S5</b> | 28.40                     | 118.27     | -89.87        |
| <b>S6</b> | -37.86                    | 60.33      | -98.19        |
| <b>S3</b> | 48.70                     | 135.42     | -86.72        |
| <b>S4</b> | -18.56                    | 73.76      | -92.31        |
| <b>3</b>  | 40.47                     | 128.61     | -88.13        |
| <b>4</b>  | -21.33                    | 74.88      | -96.21        |

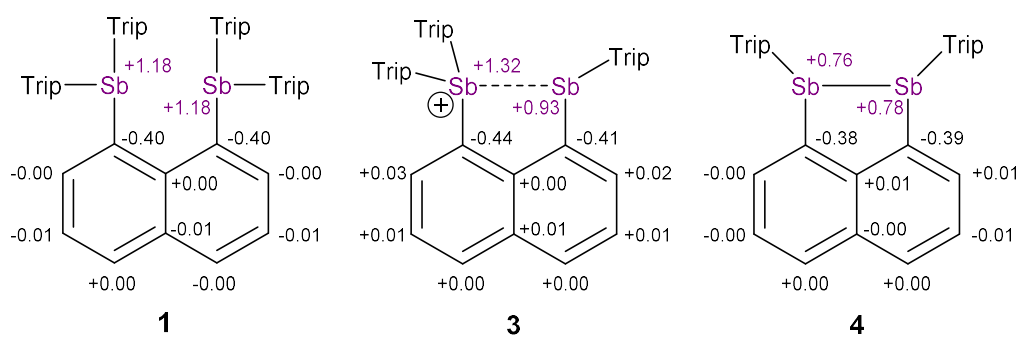

**Figure S38.** Atomic charges calculated using AIM analysis (B3LYP-D3BJ/TZP).

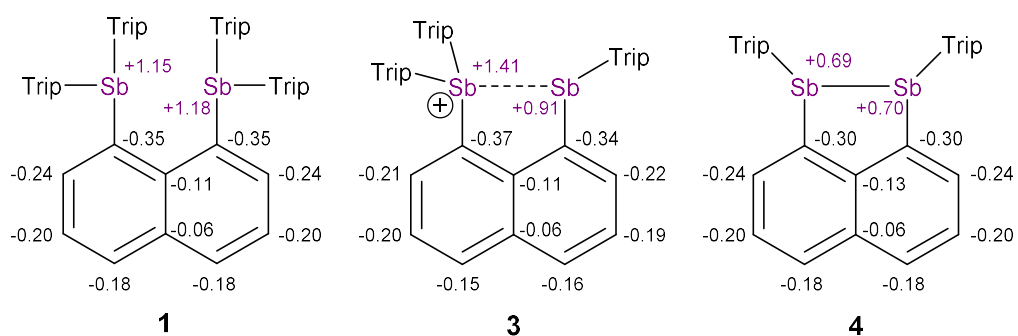

**Figure S39.** Atomic charges calculated using NBO analysis (B3LYP-D3BJ/def2-TZVP).

#### IV. Cartesian Coordinates and Absolute Energies for All Calculated Compounds

**Table S13.** Absolute energies [au] calculated by means B3LYP-D3BJ/def2-TZVP.

|           | <i>E</i>     |
|-----------|--------------|
| <b>1</b>  | -3208.620120 |
| <b>2</b>  | -3157.355407 |
| <b>3</b>  | -2622.668353 |
| <b>4</b>  | -2037.105805 |
| <b>S1</b> | -1871.236600 |
| <b>S2</b> | -1819.966979 |
| <b>S3</b> | -1639.278526 |
| <b>S4</b> | -1407.739882 |
| <b>S5</b> | -680.145643  |
| <b>S6</b> | -640.445580  |

Cartesian coordinates of the optimized geometry for **1** at B3LYP-D3BJ/def2-TZVP level of theory:

|    |             |             |             |
|----|-------------|-------------|-------------|
| Sb | 1.58866500  | 0.05952800  | 0.28240300  |
| C  | 1.27493100  | 0.13711400  | 2.44820500  |
| C  | 2.40489800  | 0.38681100  | 3.19390100  |
| H  | 3.35143500  | 0.52372400  | 2.69188600  |
| C  | 1.63911600  | -2.07269700 | -0.28915400 |
| C  | 0.00267700  | 0.00604300  | 3.10113700  |
| C  | 0.00329800  | 0.00792800  | 4.53924000  |
| C  | 1.20095000  | 0.24121000  | 5.25584100  |
| H  | 1.15931200  | 0.25058000  | 6.33826400  |
| C  | 2.37706100  | 0.45753300  | 4.59773300  |
| H  | 3.29052900  | 0.65483900  | 5.14436200  |
| C  | 4.01139300  | 1.80154200  | -0.40141000 |
| C  | 5.32240700  | 2.09705600  | -0.76194000 |
| H  | 5.53302300  | 3.04548700  | -1.23983500 |
| C  | 6.36821000  | 1.21063700  | -0.52740500 |
| C  | 6.07620400  | 0.01864400  | 0.11923000  |
| H  | 6.88812500  | -0.66698200 | 0.33222100  |
| C  | 4.77741400  | -0.32582900 | 0.49667600  |
| C  | 2.93955200  | 2.84673600  | -0.68992300 |
| H  | 2.02760900  | 2.55134000  | -0.17158200 |
| C  | 1.37167600  | -3.18034800 | 0.53575000  |
| C  | 1.31900500  | -4.45481700 | -0.03098900 |
| H  | 1.10293600  | -5.30275000 | 0.60816300  |
| C  | 1.53754400  | -4.68273700 | -1.37922900 |
| C  | 1.80815100  | -3.58060900 | -2.17955700 |
| H  | 1.98661700  | -3.73039000 | -3.23611800 |
| C  | 1.84875100  | -2.28597600 | -1.66981300 |
| C  | 1.12211900  | -3.09189000 | 2.02978300  |
| H  | 1.29480800  | -2.06761200 | 2.33470500  |
| C  | 2.08501300  | -3.96187800 | 2.84626500  |
| H  | 1.92802600  | -5.02559000 | 2.65846300  |
| H  | 1.92970800  | -3.78653900 | 3.91266000  |
| H  | 3.12364700  | -3.73216700 | 2.61432400  |
| C  | -0.33031800 | -3.43751900 | 2.37721600  |
| H  | -1.02877100 | -2.83193900 | 1.80432400  |
| H  | -0.52504500 | -3.25493000 | 3.43558300  |
| H  | -0.54492500 | -4.48727500 | 2.16590300  |
| C  | 1.46245300  | -6.08018100 | -1.95587200 |
| H  | 1.30172000  | -6.76359400 | -1.11663100 |
| C  | 2.77026800  | -6.48754600 | -2.64307400 |
| H  | 2.71722400  | -7.52131700 | -2.99102800 |
| H  | 3.61598800  | -6.39768500 | -1.95980800 |
| H  | 2.97314800  | -5.85543400 | -3.50996900 |
| C  | 0.26892800  | -6.22455200 | -2.90820900 |
| H  | 0.37352000  | -5.55929900 | -3.76792600 |
| H  | -0.66620000 | -5.97353800 | -2.40523600 |

|    |             |             |             |
|----|-------------|-------------|-------------|
| H  | 0.19250200  | -7.24774100 | -3.28249100 |
| C  | 2.14785900  | -1.16497700 | -2.65607900 |
| H  | 1.88170300  | -0.21680800 | -2.18422200 |
| C  | 3.63905600  | -1.09466300 | -3.00513200 |
| H  | 3.96358800  | -2.02030900 | -3.48580100 |
| H  | 4.24969500  | -0.93923500 | -2.11793100 |
| H  | 3.83059200  | -0.26912600 | -3.69389700 |
| C  | 1.29305100  | -1.25655700 | -3.92387300 |
| H  | 1.42196000  | -0.35870700 | -4.53019700 |
| H  | 0.23596300  | -1.35507600 | -3.67806000 |
| H  | 1.57695100  | -2.10980500 | -4.54165500 |
| C  | 3.72628100  | 0.55826200  | 0.20359100  |
| C  | 3.30271400  | 4.23175100  | -0.14682400 |
| H  | 4.15726300  | 4.66554300  | -0.66915700 |
| H  | 3.54577400  | 4.18357300  | 0.91551200  |
| H  | 2.45724100  | 4.91105700  | -0.27187300 |
| C  | 2.59202200  | 2.90807500  | -2.18123100 |
| H  | 3.45377400  | 3.22891800  | -2.77055200 |
| H  | 1.77342800  | 3.60880200  | -2.35538200 |
| H  | 2.28057700  | 1.93094300  | -2.55162200 |
| C  | 7.78409900  | 1.53547600  | -0.95377800 |
| H  | 8.41172600  | 0.69426900  | -0.64483800 |
| C  | 8.31495600  | 2.79283300  | -0.25572400 |
| H  | 9.35605100  | 2.97567600  | -0.53021900 |
| H  | 8.25850800  | 2.69239700  | 0.82917000  |
| H  | 7.73564400  | 3.67374200  | -0.53974300 |
| C  | 7.89328800  | 1.66221700  | -2.47799900 |
| H  | 7.29530300  | 2.49927800  | -2.84438800 |
| H  | 7.53769000  | 0.75713300  | -2.97255100 |
| H  | 8.92909800  | 1.83443300  | -2.77825400 |
| C  | 4.57937200  | -1.63967500 | 1.23173200  |
| H  | 3.52742200  | -1.71288600 | 1.49707400  |
| C  | 5.38192400  | -1.67828600 | 2.53909300  |
| H  | 6.45616500  | -1.67259400 | 2.34652900  |
| H  | 5.15007200  | -2.58604300 | 3.09939100  |
| H  | 5.15194400  | -0.82275500 | 3.17433300  |
| C  | 4.92221800  | -2.84946400 | 0.35532100  |
| H  | 4.31596000  | -2.86911200 | -0.54768500 |
| H  | 4.74053400  | -3.77824100 | 0.89882700  |
| H  | 5.97406700  | -2.83288200 | 0.06280500  |
| C  | -1.27011300 | -0.12711200 | 2.44974400  |
| C  | -2.39930300 | -0.37554700 | 3.19699800  |
| H  | -3.34607300 | -0.51472500 | 2.69610500  |
| C  | -1.19369400 | -0.22364900 | 5.25747800  |
| H  | -1.15113200 | -0.23005500 | 6.33988700  |
| C  | -2.37027700 | -0.44235700 | 4.60096900  |
| H  | -3.28317200 | -0.63865100 | 5.14891800  |
| Sb | -1.58473000 | -0.05430100 | 0.28400900  |
| C  | -1.64380800 | 2.07653700  | -0.29105100 |
| C  | -4.00078400 | -1.80605300 | -0.39735900 |
| C  | -5.31097300 | -2.10722700 | -0.75618100 |
| H  | -5.51823800 | -3.05699600 | -1.23287800 |
| C  | -6.36008600 | -1.22472300 | -0.52161600 |
| C  | -6.07224500 | -0.03072500 | 0.12319900  |
| H  | -6.88668500 | 0.65197300  | 0.33597500  |
| C  | -4.77450200 | 0.31940000  | 0.49906800  |
| C  | -2.92484200 | -2.84682800 | -0.68672100 |
| H  | -2.01361900 | -2.54769200 | -0.16931700 |
| C  | -1.37954100 | 3.18643500  | 0.53177700  |
| C  | -1.33387200 | 4.46037100  | -0.03670300 |
| H  | -1.12017300 | 5.31013000  | 0.60082000  |
| C  | -1.55605500 | 4.68540600  | -1.38485600 |
| C  | -1.82315800 | 3.58098300  | -2.18317100 |
| H  | -2.00418100 | 3.72847400  | -3.23962900 |
| C  | -1.85691500 | 2.28688900  | -1.67158400 |
| C  | -1.12552200 | 3.10047000  | 2.02513500  |
| H  | -1.29509300 | 2.07620400  | 2.33177200  |
| C  | -2.08804200 | 3.96905400  | 2.84348800  |
| H  | -1.93406600 | 5.03298700  | 2.65444800  |

|   |             |             |             |
|---|-------------|-------------|-------------|
| H | -1.92950300 | 3.79493600  | 3.90960400  |
| H | -3.12680100 | 3.73667400  | 2.61448600  |
| C | 0.32739500  | 3.44925400  | 2.36743700  |
| H | 1.02498500  | 2.84373000  | 1.79330700  |
| H | 0.52584100  | 3.26896900  | 3.42551400  |
| H | 0.53954700  | 4.49897100  | 2.15339700  |
| C | -1.48757500 | 6.08221900  | -1.96378100 |
| H | -1.32847500 | 6.76764300  | -1.12587100 |
| C | -2.79786500 | 6.48324000  | -2.64997000 |
| H | -2.74934600 | 7.51661200  | -2.99976800 |
| H | -3.64233700 | 6.39124100  | -1.96544600 |
| H | -2.99940200 | 5.84885900  | -3.51552200 |
| C | -0.29579900 | 6.22963200  | -2.91786900 |
| H | -0.39922300 | 5.56297500  | -3.77663500 |
| H | 0.64078400  | 5.98233500  | -2.41573000 |
| H | -0.22334600 | 7.25263100  | -3.29346200 |
| C | -2.15212300 | 1.16321500  | -2.65593300 |
| H | -1.88340900 | 0.21671200  | -2.18225200 |
| C | -3.64283000 | 1.08765900  | -3.00587300 |
| H | -3.96993300 | 2.01128900  | -3.48866500 |
| H | -4.25356000 | 0.93218200  | -2.11873200 |
| H | -3.83137900 | 0.26012700  | -3.69306200 |
| C | -1.29653200 | 1.25528000  | -3.92317200 |
| H | -1.42322000 | 0.35667400  | -4.52883800 |
| H | -0.23982000 | 1.35605000  | -3.67655300 |
| H | -1.58154000 | 2.10750000  | -4.54184900 |
| C | -3.72019500 | -0.56101100 | 0.20619600  |
| C | -3.28140300 | -4.23347600 | -0.14348100 |
| H | -4.13406500 | -4.67129200 | -0.66555100 |
| H | -3.52427500 | -4.18648600 | 0.91894300  |
| H | -2.43269000 | -4.90868000 | -0.26882400 |
| C | -2.57838000 | -2.90671500 | -2.17834600 |
| H | -3.43881400 | -3.23283200 | -2.76671000 |
| H | -1.75580700 | -3.60258700 | -2.35287500 |
| H | -2.27305700 | -1.92795800 | -2.54945400 |
| C | -7.77506200 | -1.55573700 | -0.94626600 |
| H | -8.40580100 | -0.71676900 | -0.63757600 |
| C | -8.30013500 | -2.81452700 | -0.24642300 |
| H | -9.34074100 | -3.00187900 | -0.51973200 |
| H | -8.24306000 | -2.71275200 | 0.83831300  |
| H | -7.71752100 | -3.69336600 | -0.53010000 |
| C | -7.88520200 | -1.68447500 | -2.47025500 |
| H | -7.28420900 | -2.51950300 | -2.83636100 |
| H | -7.53371200 | -0.77847900 | -2.96607300 |
| H | -8.92059800 | -1.86115600 | -2.76934000 |
| C | -4.58100900 | 1.63522500  | 1.23192500  |
| H | -3.52924300 | 1.71281800  | 1.49679000  |
| C | -5.38335200 | 1.67344100  | 2.53943000  |
| H | -6.45761600 | 1.66429000  | 2.34712800  |
| H | -5.15404800 | 2.58280800  | 3.09817500  |
| H | -5.15078700 | 0.81964600  | 3.17605000  |
| C | -4.92851700 | 2.84236600  | 0.35368500  |
| H | -4.32306400 | 2.86257600  | -0.54982900 |
| H | -4.74945200 | 3.77260500  | 0.89557400  |
| H | -5.98054500 | 2.82179400  | 0.06203700  |

Cartesian coordinates of the optimized geometry for **2** at B3LYP-D3BJ/def2-TZVP level of theory:

|    |            |             |            |
|----|------------|-------------|------------|
| Bi | 1.61862000 | 0.42118300  | 0.09063800 |
| C  | 1.22137000 | 0.38407300  | 2.36473200 |
| C  | 2.27833700 | 0.85015300  | 3.11044400 |
| H  | 3.18089500 | 1.17350100  | 2.61150700 |
| C  | 2.23745500 | 0.91109700  | 4.51645000 |
| H  | 3.09422200 | 1.28297000  | 5.06414000 |
| C  | 1.12728200 | 0.46573500  | 5.17235100 |
| H  | 1.08398800 | 0.46391800  | 6.25482500 |
| C  | 0.00003000 | -0.00028700 | 4.45447000 |



|   |             |             |             |
|---|-------------|-------------|-------------|
| C | 0.00001200  | -0.00024800 | 3.01507900  |
| C | 2.08281200  | -1.75899500 | -0.53469400 |
| C | 1.83613100  | -2.91796600 | 0.22211400  |
| C | 2.20039300  | -4.15817800 | -0.29663500 |
| H | 2.02159300  | -5.04261000 | 0.30267100  |
| C | 2.77944200  | -4.29721900 | -1.55196000 |
| C | 2.97412800  | -3.14696500 | -2.30138100 |
| H | 3.40997500  | -3.23879600 | -3.28955600 |
| C | 2.63738300  | -1.88057800 | -1.82007100 |
| C | 1.16884400  | -2.89562600 | 1.58325900  |
| H | 0.88641900  | -1.87173500 | 1.78795300  |
| C | 2.10155300  | -3.33027000 | 2.71802300  |
| H | 2.42987200  | -4.36370100 | 2.58765200  |
| H | 1.58270400  | -3.25816600 | 3.67599900  |
| H | 2.98639200  | -2.69949100 | 2.77082400  |
| C | -0.11762000 | -3.72713600 | 1.60368100  |
| H | 0.09058400  | -4.79413500 | 1.50354000  |
| H | -0.77979500 | -3.44493800 | 0.78685600  |
| H | -0.65241600 | -3.57210000 | 2.54184300  |
| C | 3.18520500  | -5.65376200 | -2.08720500 |
| H | 3.58983000  | -5.49371100 | -3.09114400 |
| C | 4.29353700  | -6.28149200 | -1.23345200 |
| H | 3.94098800  | -6.47667500 | -0.21850300 |
| H | 5.15662800  | -5.61790600 | -1.16362000 |
| H | 4.62214800  | -7.23079300 | -1.66207000 |
| C | 1.98435300  | -6.59801800 | -2.21488500 |
| H | 2.28602300  | -7.54939700 | -2.65829400 |
| H | 1.20585600  | -6.15899600 | -2.84080000 |
| H | 1.54640400  | -6.81000100 | -1.23733400 |
| C | 2.88727600  | -0.69869400 | -2.74603900 |
| H | 2.59580800  | 0.21669100  | -2.23268600 |
| C | 2.00975600  | -0.77910200 | -4.00029300 |
| H | 2.26554100  | -1.64858300 | -4.60821900 |
| H | 2.14040300  | 0.11214100  | -4.61807700 |
| H | 0.95498600  | -0.85824800 | -3.73222000 |
| C | 4.36915300  | -0.53188600 | -3.09611200 |
| H | 4.97031200  | -0.41243200 | -2.19565900 |
| H | 4.51494400  | 0.35307300  | -3.71858100 |
| H | 4.74521900  | -1.39532600 | -3.64779000 |
| C | 3.83369700  | 1.08965800  | 0.11488200  |
| C | 4.89686300  | 0.29545900  | 0.58481000  |
| C | 6.20583900  | 0.68293500  | 0.30612200  |
| H | 7.01786600  | 0.06103900  | 0.66191200  |
| C | 6.50278700  | 1.83139100  | -0.41797400 |
| C | 5.44338200  | 2.61903800  | -0.84092300 |
| H | 5.65983400  | 3.52772600  | -1.39071300 |
| C | 4.11457300  | 2.27539100  | -0.58609000 |
| C | 4.70504000  | -0.96860200 | 1.40347700  |
| H | 3.63660300  | -1.10635200 | 1.54919400  |
| C | 5.24125500  | -2.21124600 | 0.68374800  |
| H | 5.02321500  | -3.10900600 | 1.26433000  |
| H | 6.32416300  | -2.14973500 | 0.55717900  |
| H | 4.78882800  | -2.32961200 | -0.29766000 |
| C | 5.34872300  | -0.84669200 | 2.79121100  |
| H | 5.10496400  | -1.72004300 | 3.39957400  |
| H | 5.00252200  | 0.03980600  | 3.32076700  |
| H | 6.43613300  | -0.78840800 | 2.71657700  |
| C | 7.93215600  | 2.21037100  | -0.74203500 |
| H | 7.89591000  | 3.15757000  | -1.28856300 |
| C | 8.76504400  | 2.43593900  | 0.52475300  |
| C | 8.58890300  | 1.16974200  | -1.65721800 |
| C | 3.04259100  | 3.23130800  | -1.09083400 |
| H | 2.06864100  | 2.84933200  | -0.78525100 |
| C | 3.17978200  | 4.62030600  | -0.45756500 |
| H | 3.17584400  | 4.55375900  | 0.63105100  |
| H | 2.35011000  | 5.26090800  | -0.76306300 |
| H | 4.10875000  | 5.10625500  | -0.76081100 |
| C | 3.01583800  | 3.31746900  | -2.62083300 |
| H | 2.86593900  | 2.33458700  | -3.06862700 |

|    |             |             |             |
|----|-------------|-------------|-------------|
| H  | 3.95217500  | 3.72086100  | -3.01057100 |
| H  | 2.20408700  | 3.96817600  | -2.95206000 |
| C  | -1.22137100 | -0.38449500 | 2.36474400  |
| C  | -2.27834300 | -0.85057300 | 3.11045700  |
| H  | -3.18093900 | -1.17382800 | 2.61152500  |
| C  | -2.23741800 | -0.91161500 | 4.51645600  |
| H  | -3.09418400 | -1.28348700 | 5.06414900  |
| C  | -1.12721000 | -0.46633400 | 5.17235300  |
| H  | -1.08388400 | -0.46458900 | 6.25482600  |
| Bi | -1.61874500 | -0.42145800 | 0.09067800  |
| C  | -2.08264700 | 1.75881900  | -0.53453000 |
| C  | -1.83579600 | 2.91775100  | 0.22228700  |
| C  | -2.19983000 | 4.15802200  | -0.29648600 |
| H  | -2.02091300 | 5.04242600  | 0.30282600  |
| C  | -2.77882600 | 4.29715600  | -1.55182300 |
| C  | -2.97372200 | 3.14692800  | -2.30123200 |
| H  | -3.40954900 | 3.23882600  | -3.28940900 |
| C  | -2.63720000 | 1.88048800  | -1.81990700 |
| C  | -1.16862400 | 2.89531700  | 1.58349100  |
| H  | -0.88637400 | 1.87138500  | 1.78820900  |
| C  | -2.10136600 | 3.33009800  | 2.71817700  |
| H  | -2.42962300 | 4.36353700  | 2.58771800  |
| H  | -1.58256600 | 3.25803200  | 3.67618200  |
| H  | -2.98624100 | 2.69937000  | 2.77098900  |
| C  | 0.11796300  | 3.72663500  | 1.60406100  |
| H  | -0.09005700 | 4.79366200  | 1.50383700  |
| H  | 0.78022900  | 3.44429900  | 0.78736300  |
| H  | 0.65258700  | 3.57155900  | 2.54231200  |
| C  | -3.18434600 | 5.65376600  | -2.08708300 |
| H  | -3.58888700 | 5.49379200  | -3.09106900 |
| C  | -4.29268300 | 6.28161800  | -1.23342600 |
| H  | -3.94021000 | 6.47670600  | -0.21843100 |
| H  | -5.15587200 | 5.61814800  | -1.16371200 |
| H  | -4.62111700 | 7.23098300  | -1.66203800 |
| C  | -1.98336000 | 6.59787000  | -2.21461800 |
| H  | -2.28486100 | 7.54928900  | -2.65805600 |
| H  | -1.20484700 | 6.15875500  | -2.84044800 |
| H  | -1.54549400 | 6.80979700  | -1.23701800 |
| C  | -2.88728400 | 0.69863500  | -2.74586500 |
| H  | -2.59596800 | -0.21679400 | -2.23250600 |
| C  | -2.00975000 | 0.77889000  | -4.00011600 |
| H  | -2.26538000 | 1.64841200  | -4.60804800 |
| H  | -2.14054400 | -0.11233200 | -4.61789800 |
| H  | -0.95496600 | 0.85785700  | -3.73203800 |
| C  | -4.36919000 | 0.53204800  | -3.09592600 |
| H  | -4.97036100 | 0.41272200  | -2.19546400 |
| H  | -4.51512000 | -0.35291600 | -3.71835500 |
| H  | -4.74512600 | 1.39552300  | -3.64763900 |
| C  | -3.83393900 | -1.08956400 | 0.11496700  |
| C  | -4.89695400 | -0.29516500 | 0.58489900  |
| C  | -6.20600200 | -0.68235700 | 0.30618100  |
| H  | -7.01790500 | -0.06030100 | 0.66196700  |
| C  | -6.50317500 | -1.83072600 | -0.41796200 |
| C  | -5.44392700 | -2.61857900 | -0.84091700 |
| H  | -5.66055000 | -3.52719700 | -1.39075300 |
| C  | -4.11504700 | -2.27521300 | -0.58604800 |
| C  | -4.70484900 | 0.96881400  | 1.40361900  |
| H  | -3.63637200 | 1.10637900  | 1.54921900  |
| C  | -5.24094600 | 2.21159200  | 0.68403600  |
| H  | -5.02270600 | 3.10927600  | 1.26466000  |
| H  | -6.32387700 | 2.15026200  | 0.55757400  |
| H  | -4.78859900 | 2.32995800  | -0.29741000 |
| C  | -5.34837800 | 0.84689100  | 2.79142200  |
| H  | -5.10446100 | 1.72018300  | 3.39980600  |
| H  | -5.00219500 | -0.03967300 | 3.32088200  |
| H  | -6.43580300 | 0.78871200  | 2.71691300  |
| C  | -7.93261000 | -2.20930400 | -0.74219400 |
| H  | -7.89658200 | -3.15672600 | -1.28835100 |
| C  | -8.76598800 | -2.43403300 | 0.52441800  |

|   |             |             |             |
|---|-------------|-------------|-------------|
| H | -8.85453100 | -1.51341100 | 1.10482100  |
| H | -8.30935800 | -3.18966400 | 1.16535300  |
| H | -9.77486900 | -2.76461500 | 0.26846400  |
| C | -8.58864700 | -1.16874700 | -1.65797700 |
| H | -8.00761500 | -1.02884700 | -2.57072500 |
| H | -8.66197300 | -0.20043900 | -1.15856400 |
| H | -9.59795800 | -1.47956900 | -1.93626700 |
| C | -3.04326200 | -3.23135200 | -1.09077500 |
| H | -2.06922900 | -2.84948900 | -0.78532200 |
| C | -3.18061700 | -4.62023900 | -0.45729700 |
| H | -3.17644800 | -4.55354100 | 0.63130900  |
| H | -2.35114300 | -5.26105900 | -0.76287400 |
| H | -4.10975100 | -5.10603100 | -0.76029000 |
| C | -3.01665400 | -3.31770500 | -2.62076400 |
| H | -2.86667800 | -2.33489100 | -3.06869000 |
| H | -3.95306800 | -3.72103500 | -3.01037800 |
| H | -2.20500700 | -3.96854700 | -2.95198600 |
| H | 8.00806600  | 1.02907200  | -2.56997200 |
| H | 9.59807000  | 1.48101300  | -1.93552900 |
| H | 8.66275100  | 0.20170900  | -1.15735000 |
| H | 8.30808800  | 3.19192400  | 1.16504100  |
| H | 8.85339200  | 1.51566600  | 1.10574200  |
| H | 9.77399800  | 2.76645000  | 0.26898900  |

Cartesian coordinates of the optimized geometry for **3** at B3LYP-D3BJ/def2-TZVP level of theory:

|    |             |             |             |
|----|-------------|-------------|-------------|
| Sb | 0.69892300  | -0.19792900 | -0.46221400 |
| C  | 0.44651200  | -1.58513800 | -2.05666800 |
| Sb | -1.11916200 | -1.62859700 | 1.12532900  |
| C  | 0.90898600  | -1.33036500 | -3.32358000 |
| H  | 1.34560300  | -0.37192300 | -3.56580700 |
| C  | 0.85176000  | -2.32881300 | -4.31391400 |
| H  | 1.22017100  | -2.11813400 | -5.30881200 |
| C  | 0.35720900  | -3.56751900 | -4.00245500 |
| H  | 0.34069900  | -4.35264500 | -4.74789100 |
| C  | -0.70186100 | -5.12230100 | -2.41116900 |
| H  | -0.67483300 | -5.89312700 | -3.17084600 |
| C  | -1.25286800 | -5.37162700 | -1.18575900 |
| H  | -1.66062900 | -6.34658100 | -0.95489700 |
| C  | -1.32497700 | -4.34215300 | -0.22458100 |
| H  | -1.81520400 | -4.55663900 | 0.71812800  |
| C  | -0.81402300 | -3.09048900 | -0.47263200 |
| C  | -0.16581400 | -2.82486100 | -1.71845900 |
| C  | -0.16366700 | -3.84900500 | -2.71694600 |
| C  | -3.03877700 | -0.67156400 | 0.72722400  |
| C  | -3.69716500 | -0.61321700 | -0.51398700 |
| C  | -4.93654700 | 0.02084700  | -0.58416400 |
| H  | -5.44902400 | 0.06599800  | -1.53684600 |
| C  | -5.53757400 | 0.60348200  | 0.52143700  |
| C  | -4.86491000 | 0.53947300  | 1.73875500  |
| H  | -5.31617600 | 0.99555100  | 2.60803200  |
| C  | -3.62873200 | -0.08012900 | 1.86986100  |
| C  | -3.14336200 | -1.24156300 | -1.77390300 |
| H  | -2.10254100 | -1.46737800 | -1.58709100 |
| C  | -3.85301200 | -2.56763500 | -2.07278600 |
| H  | -4.89972400 | -2.39540200 | -2.33002600 |
| H  | -3.82455500 | -3.23399400 | -1.21144300 |
| H  | -3.37530200 | -3.07539100 | -2.91228800 |
| C  | -3.16314900 | -0.32454800 | -2.99889800 |
| H  | -4.17657300 | -0.06403400 | -3.30572900 |
| H  | -2.68563200 | -0.83088100 | -3.83937400 |
| H  | -2.62010400 | 0.60042800  | -2.81274100 |
| C  | -6.86846300 | 1.31131900  | 0.39899400  |
| H  | -7.21026200 | 1.17461700  | -0.63070200 |
| C  | -6.71371900 | 2.81814800  | 0.64347700  |
| H  | -5.98276300 | 3.25635000  | -0.03801300 |
| H  | -6.38303000 | 3.01736700  | 1.66491900  |

|   |             |             |             |
|---|-------------|-------------|-------------|
| H | -7.66623800 | 3.32926000  | 0.49550100  |
| C | -7.92638900 | 0.70449800  | 1.32729900  |
| H | -8.89203200 | 1.18702800  | 1.16923100  |
| H | -7.65722900 | 0.83941500  | 2.37670100  |
| H | -8.04498900 | -0.36439200 | 1.14528600  |
| C | -2.97927500 | -0.12735200 | 3.24846600  |
| H | -1.89411700 | -0.13551800 | 3.11242600  |
| C | -3.36777000 | -1.41860700 | 3.98078600  |
| H | -4.44611500 | -1.44887000 | 4.14538600  |
| H | -2.87053300 | -1.47921700 | 4.95025400  |
| H | -3.09972300 | -2.30769300 | 3.40660900  |
| C | -3.27160400 | 1.09162900  | 4.12731700  |
| H | -3.05929300 | 2.02491700  | 3.60617500  |
| H | -2.65006900 | 1.05282300  | 5.02282800  |
| H | -4.31005600 | 1.11573400  | 4.45928300  |
| C | 0.90502800  | 1.80945000  | -1.18038500 |
| C | -0.12701200 | 2.73595200  | -0.96205400 |
| C | 0.14719800  | 4.07881700  | -1.19669000 |
| H | -0.63484900 | 4.80505700  | -1.02191300 |
| C | 1.38818400  | 4.51629300  | -1.64876500 |
| C | 2.36481800  | 3.56253200  | -1.90149800 |
| H | 3.32303400  | 3.88931900  | -2.28510600 |
| C | 2.15808600  | 2.20259200  | -1.67632100 |
| C | -1.51717900 | 2.35161600  | -0.49287600 |
| H | -1.61602300 | 1.26530700  | -0.56783800 |
| C | -1.75947500 | 2.73904900  | 0.96964900  |
| H | -1.59978100 | 3.80865400  | 1.11411900  |
| H | -1.09383200 | 2.20953500  | 1.65011000  |
| H | -2.78382700 | 2.50253400  | 1.25147000  |
| C | 1.66741100  | 5.98706400  | -1.86508700 |
| H | 2.69148400  | 6.06703600  | -2.23973400 |
| C | 0.73476000  | 6.59212100  | -2.92072900 |
| H | 0.80117200  | 6.04974400  | -3.86479200 |
| H | 0.99800400  | 7.63433200  | -3.10662600 |
| H | -0.30557500 | 6.56689200  | -2.59051300 |
| C | 1.59115000  | 6.76275300  | -0.54406100 |
| H | 1.85880400  | 7.80863000  | -0.70087800 |
| H | 2.27039900  | 6.34405100  | 0.19993300  |
| H | 0.58095100  | 6.73628700  | -0.13040200 |
| C | 3.28650800  | 1.24383800  | -2.01199900 |
| H | 2.94636800  | 0.22472600  | -1.81736800 |
| C | 3.64835000  | 1.30811700  | -3.50188300 |
| H | 2.76986900  | 1.18735500  | -4.13685900 |
| H | 4.36331000  | 0.52219000  | -3.74974300 |
| H | 4.10544000  | 2.26522800  | -3.75482500 |
| C | 4.52427900  | 1.48348300  | -1.14069200 |
| H | 4.93910200  | 2.47538800  | -1.32465900 |
| H | 5.29808600  | 0.75097300  | -1.37227200 |
| H | 4.28971300  | 1.40281400  | -0.08132600 |
| C | 2.47611500  | -0.54475200 | 0.70669500  |
| C | 3.45822900  | -1.49857400 | 0.40259000  |
| C | 4.56472700  | -1.58592800 | 1.24553400  |
| H | 5.33114800  | -2.31801200 | 1.02687600  |
| C | 4.72896800  | -0.76578500 | 2.35369000  |
| C | 3.72888300  | 0.15912400  | 2.63327100  |
| H | 3.83212200  | 0.80554700  | 3.49481600  |
| C | 2.59551800  | 0.28349500  | 1.83789300  |
| C | 3.35842400  | -2.46099700 | -0.76342800 |
| H | 2.60803600  | -2.07940200 | -1.44810400 |
| C | 4.65403400  | -2.57938200 | -1.57099900 |
| H | 4.47932500  | -3.18558500 | -2.46102400 |
| H | 5.45078300  | -3.05917000 | -1.00185000 |
| H | 5.01329200  | -1.60100800 | -1.89190500 |
| C | 2.87524000  | -3.83650200 | -0.28462300 |
| H | 1.93412300  | -3.75961100 | 0.26025100  |
| H | 3.61075500  | -4.29412900 | 0.37937800  |
| H | 2.71918400  | -4.50399700 | -1.13353900 |
| C | 5.96205700  | -0.87435800 | 3.22305300  |
| H | 6.57238600  | -1.68344900 | 2.81266000  |

|   |             |             |             |
|---|-------------|-------------|-------------|
| C | 5.60619300  | -1.24405500 | 4.66762000  |
| H | 5.01678300  | -0.45753000 | 5.14317300  |
| H | 6.51260700  | -1.38156700 | 5.25898500  |
| H | 5.02850000  | -2.16848000 | 4.70823800  |
| C | 6.79393500  | 0.41296100  | 3.16699800  |
| H | 7.06573800  | 0.66308900  | 2.14049700  |
| H | 7.71185400  | 0.29928300  | 3.74559400  |
| H | 6.24032500  | 1.25703600  | 3.58350100  |
| C | 1.55437700  | 1.31359200  | 2.23814900  |
| H | 0.71240700  | 1.24385700  | 1.54620700  |
| C | 0.97741500  | 1.02963900  | 3.62900900  |
| H | 0.16294700  | 1.72128700  | 3.85144200  |
| H | 1.73509500  | 1.15052400  | 4.40369200  |
| H | 0.59477700  | 0.01001600  | 3.69529800  |
| C | 2.08134000  | 2.74680800  | 2.11969100  |
| H | 2.42739100  | 2.95639200  | 1.10826000  |
| H | 2.91300600  | 2.91330800  | 2.80559800  |
| H | 1.29467900  | 3.46183900  | 2.36429000  |
| C | -2.61116000 | 2.95588200  | -1.38079400 |
| H | -2.41202900 | 2.78373400  | -2.43810500 |
| H | -2.69473700 | 4.03254300  | -1.22738500 |
| H | -3.57318000 | 2.50846400  | -1.13281200 |

Cartesian coordinates of the optimized geometry for **4** at B3LYP-D3BJ/def2-TZVP level of theory:

|    |             |             |             |
|----|-------------|-------------|-------------|
| Sb | 0.72627500  | -0.00964000 | 1.17206200  |
| C  | 0.65884800  | 2.16024000  | 1.00233300  |
| Sb | -0.71822100 | -0.03651200 | -1.24942300 |
| C  | 1.32590300  | 2.89790600  | 1.95129500  |
| H  | 1.90605600  | 2.39769100  | 2.71797100  |
| C  | 1.28113000  | 4.30693900  | 1.95156100  |
| H  | 1.82853100  | 4.86033400  | 2.70395000  |
| C  | 0.54059500  | 4.96525000  | 1.00885700  |
| H  | 0.48961600  | 6.04732000  | 1.00385000  |
| C  | -0.95800400 | 4.92895900  | -0.94410200 |
| H  | -0.99981200 | 6.01083500  | -0.90810000 |
| C  | -1.64139500 | 4.23689800  | -1.90563800 |
| H  | -2.23560800 | 4.76268400  | -2.64214500 |
| C  | -1.56550500 | 2.82982500  | -1.94561400 |
| H  | -2.10239700 | 2.30378600  | -2.72638200 |
| C  | -0.83562700 | 2.12526500  | -1.01793600 |
| C  | -0.11726400 | 2.81868900  | 0.00178400  |
| C  | -0.17862600 | 4.24937900  | 0.02226900  |
| C  | 2.74319000  | -0.44617500 | 0.40069800  |
| C  | 3.43050500  | -1.50718800 | 1.03618700  |
| C  | 4.73568400  | -1.79830400 | 0.65484700  |
| H  | 5.25776300  | -2.60899700 | 1.14319400  |
| C  | 5.39444000  | -1.07680900 | -0.33636000 |
| C  | 4.69784900  | -0.05780500 | -0.96325800 |
| H  | 5.19220400  | 0.50290900  | -1.74801200 |
| C  | 3.38202500  | 0.26752800  | -0.62637300 |
| C  | 2.75455900  | -2.39230400 | 2.07518800  |
| H  | 2.08964900  | -1.75886300 | 2.66744100  |
| C  | 1.88299000  | -3.45027200 | 1.38298400  |
| H  | 2.50359100  | -4.11498200 | 0.77811000  |
| H  | 1.14752100  | -2.99511300 | 0.71774000  |
| H  | 1.34516600  | -4.05350200 | 2.11746400  |
| C  | 3.71004200  | -3.05748300 | 3.06726500  |
| H  | 3.13723600  | -3.54497700 | 3.85808200  |
| H  | 4.37689400  | -2.32871900 | 3.53026000  |
| H  | 4.32335600  | -3.82648600 | 2.59374400  |
| C  | 7.78766100  | -1.19383100 | 0.44608000  |
| H  | 7.56330500  | -1.88188100 | 1.26380800  |
| H  | 7.71894100  | -0.17762800 | 0.83704200  |
| H  | 8.81844100  | -1.37257000 | 0.13253400  |
| C  | 2.71738900  | 1.37249100  | -1.42207200 |
| H  | 1.69028500  | 1.44655300  | -1.08727300 |

|   |             |             |             |
|---|-------------|-------------|-------------|
| C | 2.67116600  | 1.05380700  | -2.92068700 |
| H | 2.20420400  | 0.08466600  | -3.10021900 |
| H | 3.67018500  | 1.03379400  | -3.35993000 |
| H | 2.08920000  | 1.81392700  | -3.44600000 |
| C | 3.35889200  | 2.73935000  | -1.16466500 |
| H | 4.39148400  | 2.76379600  | -1.51921700 |
| H | 3.35822800  | 2.97597500  | -0.10131100 |
| H | 2.80337100  | 3.52187600  | -1.68528600 |
| C | -2.69439600 | -0.65795800 | -0.50065900 |
| C | -3.38784000 | -0.03325500 | 0.55237900  |
| C | -4.67001200 | -0.47221400 | 0.87812500  |
| H | -5.19735100 | 0.02390500  | 1.68347600  |
| C | -5.28474200 | -1.52361200 | 0.21410900  |
| C | -4.57415000 | -2.15208200 | -0.80036800 |
| H | -5.03930500 | -2.98349200 | -1.31287000 |
| C | -3.29486900 | -1.74479700 | -1.17321000 |
| C | -2.81036700 | 1.09235800  | 1.38682800  |
| H | -1.79320500 | 1.25994300  | 1.05548400  |
| C | -3.55914000 | 2.41203000  | 1.17792200  |
| H | -3.58014000 | 2.68538000  | 0.12363500  |
| H | -3.06669100 | 3.21751600  | 1.72625900  |
| H | -4.58957900 | 2.34128700  | 1.53256400  |
| C | -2.73524500 | 0.72483100  | 2.87298300  |
| H | -2.19481300 | -0.21147100 | 3.01718900  |
| H | -3.72847100 | 0.61201800  | 3.31145900  |
| H | -2.21207800 | 1.50801300  | 3.42554500  |
| C | -6.67869000 | -1.98427600 | 0.58443700  |
| H | -6.92659200 | -2.81833400 | -0.07893900 |
| C | -7.71793000 | -0.88111200 | 0.35281400  |
| H | -7.69328900 | -0.52970800 | -0.67973200 |
| H | -7.52922500 | -0.02328000 | 1.00155500  |
| H | -8.72418700 | -1.24739800 | 0.56744000  |
| C | -6.73817500 | -2.50326600 | 2.02597500  |
| H | -7.73394300 | -2.88778700 | 2.25697900  |
| H | -6.51426400 | -1.70676700 | 2.73854100  |
| H | -6.01508200 | -3.30470900 | 2.18439000  |
| C | -2.55590200 | -2.53620000 | -2.24428800 |
| H | -1.93838300 | -1.83282500 | -2.80810600 |
| C | -3.46006200 | -3.22809600 | -3.26586500 |
| H | -2.85279500 | -3.64047100 | -4.07356900 |
| H | -4.17743300 | -2.53119700 | -3.70160900 |
| H | -4.01678300 | -4.05762300 | -2.82600900 |
| C | -1.60967400 | -3.55463200 | -1.59209500 |
| H | -2.17957300 | -4.28573900 | -1.01454500 |
| H | -0.90848100 | -3.07299500 | -0.90872900 |
| H | -1.03050500 | -4.08833500 | -2.34864200 |
| C | 6.82132900  | -1.39926800 | -0.72640500 |
| H | 7.10294600  | -0.69597100 | -1.51578100 |
| C | 6.94484700  | -2.81562900 | -1.30047800 |
| H | 6.27523300  | -2.95376400 | -2.15063200 |
| H | 6.69030200  | -3.56643500 | -0.54949300 |
| H | 7.96695500  | -3.00951400 | -1.63283600 |

Cartesian coordinates of the optimized geometry for **S1** at B3LYP-D3BJ/def2-TZVP level of theory:

|   |             |             |             |
|---|-------------|-------------|-------------|
| C | -4.13243900 | -0.70018900 | -0.85686700 |
| C | -4.73760500 | -1.22033500 | 0.28628800  |
| C | -4.86973900 | -0.63698200 | -2.04003100 |
| C | -6.05676400 | -1.66064600 | 0.24815700  |
| H | -4.18323000 | -1.28102500 | 1.21345800  |
| C | -6.19046600 | -1.07028700 | -2.07880800 |
| H | -4.41734900 | -0.24305800 | -2.94351000 |
| C | -6.78610500 | -1.58406200 | -0.93265400 |
| H | -6.51515200 | -2.06235600 | 1.14341500  |
| H | -6.75200000 | -1.00979000 | -3.00277200 |
| H | -7.81303700 | -1.92546200 | -0.96061200 |
| C | -1.62358600 | -0.61410100 | 1.13089500  |

|    |             |             |             |
|----|-------------|-------------|-------------|
| C  | -1.91798300 | 0.16349000  | 2.25139100  |
| C  | -1.03337100 | -1.86505000 | 1.31253300  |
| C  | -1.63486100 | -0.30611800 | 3.52998000  |
| H  | -2.37050400 | 1.13890700  | 2.13067800  |
| C  | -0.74430600 | -2.33196100 | 2.58963300  |
| H  | -0.78440100 | -2.48180800 | 0.45892200  |
| C  | -1.04689300 | -1.55446100 | 3.70068000  |
| H  | -1.86865900 | 0.30707300  | 4.39150600  |
| H  | -0.27385400 | -3.29901400 | 2.71227000  |
| H  | -0.81783600 | -1.91601600 | 4.69499100  |
| C  | -2.59827100 | 2.06121000  | -0.31563100 |
| C  | -1.57187400 | 3.00478500  | -0.24519400 |
| C  | -3.89908400 | 2.45466400  | -0.00524100 |
| C  | -1.83805400 | 4.31320200  | 0.14223400  |
| H  | -0.55425000 | 2.71987300  | -0.48487200 |
| C  | -4.16742800 | 3.76574800  | 0.37617400  |
| H  | -4.70888200 | 1.73849000  | -0.05393500 |
| C  | -3.13791800 | 4.69617000  | 0.45334400  |
| H  | -1.03106000 | 5.03313300  | 0.19946200  |
| H  | -5.18229000 | 4.05845200  | 0.61571900  |
| H  | -3.34732500 | 5.71522200  | 0.75280800  |
| C  | 3.88302600  | 0.66237200  | -1.44467100 |
| C  | 4.62427800  | -0.46832500 | -1.78529600 |
| C  | 4.40517800  | 1.92378300  | -1.73267000 |
| C  | 5.86736100  | -0.33863700 | -2.39587100 |
| H  | 4.23540700  | -1.45555600 | -1.57260200 |
| C  | 5.65038800  | 2.05558100  | -2.33764000 |
| H  | 3.84271200  | 2.81659800  | -1.48299200 |
| C  | 6.38338200  | 0.92255800  | -2.67083500 |
| H  | 6.43360300  | -1.22453300 | -2.65558300 |
| H  | 6.04550900  | 3.04087100  | -2.55134700 |
| H  | 7.35138500  | 1.02216300  | -3.14509200 |
| C  | 1.72006600  | -1.59307700 | -0.68265700 |
| C  | 2.18390900  | -2.50036500 | 0.26787300  |
| C  | 1.01969400  | -2.07238700 | -1.78964400 |
| C  | 1.94630500  | -3.86220400 | 0.11728000  |
| H  | 2.71810400  | -2.14615600 | 1.13938100  |
| C  | 0.78083700  | -3.43393600 | -1.94247600 |
| H  | 0.63944400  | -1.38367400 | -2.53408200 |
| C  | 1.24026800  | -4.33124400 | -0.98494400 |
| H  | 2.30790800  | -4.55693500 | 0.86532600  |
| H  | 0.22944800  | -3.79184600 | -2.80285000 |
| H  | 1.04805300  | -5.39061300 | -1.09725000 |
| C  | 2.75285500  | 0.44108000  | 1.55165200  |
| C  | 4.11846000  | 0.42568600  | 1.83044600  |
| C  | 1.84198700  | 0.36605300  | 2.60553800  |
| C  | 4.56541300  | 0.33062600  | 3.14475000  |
| H  | 4.83896300  | 0.48084200  | 1.02482100  |
| C  | 2.28865700  | 0.26229100  | 3.91739600  |
| H  | 0.77783400  | 0.37392500  | 2.41156100  |
| C  | 3.65195800  | 0.24627900  | 4.18949500  |
| H  | 5.62851700  | 0.31873300  | 3.35126600  |
| H  | 1.56908200  | 0.19333000  | 4.72335300  |
| H  | 4.00170600  | 0.16896900  | 5.21120500  |
| Sb | 1.96366200  | 0.54234400  | -0.45571500 |
| Sb | -2.09447500 | 0.03283300  | -0.88115400 |

Cartesian coordinates of the optimized geometry for **S2** at B3LYP-D3BJ/def2-TZVP level of theory:

|   |             |             |             |
|---|-------------|-------------|-------------|
| C | -4.25745000 | 0.57402200  | 0.80609400  |
| C | -4.77689500 | 1.34172700  | -0.23376400 |
| C | -5.09048500 | 0.21453500  | 1.86506600  |
| C | -6.11095400 | 1.73872100  | -0.21654500 |
| H | -4.14676200 | 1.62994500  | -1.06513200 |
| C | -6.42516800 | 0.60688800  | 1.88170100  |
| H | -4.70863500 | -0.38239400 | 2.68633500  |
| C | -6.93695700 | 1.37090100  | 0.83915500  |

|    |             |             |             |
|----|-------------|-------------|-------------|
| H  | -6.50470600 | 2.33465200  | -1.03080800 |
| H  | -7.06333700 | 0.31698900  | 2.70734000  |
| H  | -7.97479000 | 1.67866300  | 0.85025800  |
| C  | -1.58473900 | 0.90313500  | -1.10605900 |
| C  | -1.86755900 | 0.33194600  | -2.34601100 |
| C  | -1.00933900 | 2.17203800  | -1.05699600 |
| C  | -1.58697900 | 1.02508800  | -3.51999400 |
| H  | -2.30984200 | -0.65425900 | -2.40290300 |
| C  | -0.72133800 | 2.86114000  | -2.23045000 |
| H  | -0.76984600 | 2.63215400  | -0.10705100 |
| C  | -1.01350600 | 2.29052200  | -3.46320100 |
| H  | -1.81121800 | 0.57239800  | -4.47805100 |
| H  | -0.26173400 | 3.83986600  | -2.17781200 |
| H  | -0.78761400 | 2.82621800  | -4.37635600 |
| C  | -2.58757600 | -2.10089600 | -0.18438700 |
| C  | -1.56781800 | -3.03847400 | -0.34643400 |
| C  | -3.85813900 | -2.39128600 | -0.67695700 |
| C  | -1.80986300 | -4.24319000 | -0.99881200 |
| H  | -0.57160700 | -2.83512900 | 0.02947200  |
| C  | -4.10277500 | -3.59773900 | -1.32679400 |
| H  | -4.66282300 | -1.67655700 | -0.56078900 |
| C  | -3.07941700 | -4.52413000 | -1.49053900 |
| H  | -1.00802200 | -4.96066700 | -1.12274500 |
| H  | -5.09419800 | -3.81216300 | -1.70670100 |
| H  | -3.27028300 | -5.46114500 | -1.99801300 |
| C  | 4.00198100  | -0.84405400 | 1.24004100  |
| C  | 4.68221700  | 0.23469300  | 1.80109900  |
| C  | 4.59989200  | -2.10354800 | 1.25263300  |
| C  | 5.94315300  | 0.05622600  | 2.36212300  |
| H  | 4.23402100  | 1.21998800  | 1.80025800  |
| C  | 5.86221400  | -2.28304300 | 1.81003500  |
| H  | 4.08917600  | -2.95848600 | 0.82285800  |
| C  | 6.53534100  | -1.20158700 | 2.36616000  |
| H  | 6.46353400  | 0.90177800  | 2.79503700  |
| H  | 6.31795500  | -3.26549500 | 1.81046800  |
| H  | 7.51688600  | -1.33877900 | 2.80164600  |
| C  | 1.69615700  | 1.52869800  | 0.93792000  |
| C  | 2.15589300  | 2.59972600  | 0.17585000  |
| C  | 0.98728900  | 1.78554600  | 2.11035400  |
| C  | 1.90251000  | 3.90787700  | 0.57563600  |
| H  | 2.69837400  | 2.41900400  | -0.74286500 |
| C  | 0.72868200  | 3.09330900  | 2.51037900  |
| H  | 0.61990500  | 0.96834900  | 2.72012400  |
| C  | 1.18289300  | 4.15716600  | 1.73919800  |
| H  | 2.26130800  | 4.73329900  | -0.02697400 |
| H  | 0.17021500  | 3.28000800  | 3.41923500  |
| H  | 0.97780200  | 5.17524600  | 2.04451500  |
| C  | 2.81569700  | -0.02436100 | -1.73906800 |
| C  | 4.18459900  | 0.07534000  | -1.97588700 |
| C  | 1.91905000  | 0.27875400  | -2.76222100 |
| C  | 4.65095500  | 0.47736100  | -3.22439500 |
| H  | 4.89300800  | -0.15148000 | -1.18940900 |
| C  | 2.38583300  | 0.68635300  | -4.00713400 |
| H  | 0.85172200  | 0.21539900  | -2.59748700 |
| C  | 3.75282500  | 0.78469000  | -4.24041800 |
| H  | 5.71688600  | 0.55364700  | -3.40101400 |
| H  | 1.67845500  | 0.92877400  | -4.79025300 |
| H  | 4.11753500  | 1.10054900  | -5.20967400 |
| Bi | 1.97188600  | -0.61413000 | 0.26919900  |
| Bi | -2.10758100 | -0.13641100 | 0.83600800  |

Cartesian coordinates of the optimized geometry for **S3** at B3LYP-D3BJ/def2-TZVP level of theory:

|   |             |             |            |
|---|-------------|-------------|------------|
| C | -0.27663200 | -0.02290700 | 1.96103000 |
| C | 0.54723900  | 0.61223000  | 2.88775200 |
| C | -0.94225600 | -1.20346300 | 2.29033000 |
| C | 0.69942200  | 0.06295300  | 4.15524600 |



|    |             |             |             |
|----|-------------|-------------|-------------|
| H  | 1.06727700  | 1.52572900  | 2.63178100  |
| C  | -0.78155900 | -1.74388800 | 3.55984700  |
| H  | -1.57568900 | -1.70607400 | 1.57340400  |
| C  | 0.03911400  | -1.11414700 | 4.48937100  |
| H  | 1.33338300  | 0.55584600  | 4.88034200  |
| H  | -1.29698600 | -2.65898100 | 3.81936700  |
| H  | 0.16253700  | -1.54012600 | 5.47619700  |
| C  | 0.64112300  | 2.59222500  | 0.04629200  |
| C  | -0.04459800 | 3.80425700  | 0.01020000  |
| C  | 2.03508500  | 2.56120900  | 0.10653800  |
| C  | 0.67269600  | 4.99459400  | 0.04216800  |
| H  | -1.12559300 | 3.82768400  | -0.04075900 |
| C  | 2.74058800  | 3.75750800  | 0.13988800  |
| H  | 2.57271500  | 1.62257100  | 0.12980100  |
| C  | 2.06108500  | 4.97058000  | 0.10733400  |
| H  | 0.14575500  | 5.93911800  | 0.01657300  |
| H  | 3.82124000  | 3.74051100  | 0.18933700  |
| H  | 2.61518700  | 5.89943100  | 0.13155000  |
| C  | -2.47595800 | 1.25443000  | -0.26675800 |
| C  | -2.94393700 | 1.55030500  | -1.54646500 |
| C  | -3.34111100 | 1.26180500  | 0.82518000  |
| C  | -4.28458600 | 1.86448400  | -1.73020200 |
| H  | -2.27593200 | 1.54206700  | -2.39939300 |
| C  | -4.68155900 | 1.57531500  | 0.63118600  |
| H  | -2.98071600 | 1.02590800  | 1.81788700  |
| C  | -5.15120200 | 1.87574000  | -0.64228900 |
| H  | -4.65162500 | 2.09849800  | -2.72061000 |
| H  | -5.35752000 | 1.58482100  | 1.47587900  |
| H  | -6.19529500 | 2.11834800  | -0.78835000 |
| C  | -0.49186300 | -2.60150600 | -0.91687800 |
| C  | 0.15931700  | -3.62401900 | -0.23103500 |
| C  | -1.88791000 | -2.58074000 | -0.96399800 |
| C  | -0.58138000 | -4.60367200 | 0.42240200  |
| H  | 1.23939100  | -3.66669000 | -0.19868100 |
| C  | -2.62423900 | -3.55661500 | -0.30433700 |
| H  | -2.41330400 | -1.80096100 | -1.50396300 |
| C  | -1.97012400 | -4.56664800 | 0.39413700  |
| H  | -0.07039300 | -5.39666400 | 0.95257200  |
| H  | -3.70547400 | -3.53060300 | -0.33887100 |
| H  | -2.54285500 | -5.32902000 | 0.90522300  |
| C  | 2.43082200  | -1.02125400 | -0.89534100 |
| C  | 3.54035000  | -0.55687500 | -1.60470700 |
| C  | 2.56299400  | -1.33444100 | 0.45931700  |
| C  | 4.76715300  | -0.40627600 | -0.96741200 |
| H  | 3.45660200  | -0.30419000 | -2.65500100 |
| C  | 3.78841900  | -1.17682900 | 1.09360500  |
| H  | 1.71721400  | -1.68763200 | 1.03113300  |
| C  | 4.89020800  | -0.71141100 | 0.38257700  |
| H  | 5.62320900  | -0.05085800 | -1.52557300 |
| H  | 3.88091000  | -1.41534600 | 2.14507400  |
| H  | 5.84348600  | -0.59097400 | 0.87986800  |
| Sb | 0.55682000  | -1.03427400 | -1.95740400 |
| Sb | -0.43658000 | 0.77388000  | 0.00652800  |

Cartesian coordinates of the optimized geometry for **S4** at B3LYP-D3BJ/def2-TZVP level of theory:

|   |             |            |             |
|---|-------------|------------|-------------|
| C | -1.59236000 | 1.53931200 | 0.56217100  |
| C | -1.18961400 | 2.65318700 | 1.29759700  |
| C | -2.36585900 | 1.72813500 | -0.58346200 |
| C | -1.55170200 | 3.93410300 | 0.89715200  |
| H | -0.57286300 | 2.52982000 | 2.17945000  |
| C | -2.73062500 | 3.00869000 | -0.98262500 |
| H | -2.68504600 | 0.87613600 | -1.16990900 |
| C | -2.32319700 | 4.11427500 | -0.24370700 |
| H | -1.22277800 | 4.79018100 | 1.47230100  |
| H | -3.32935500 | 3.14307200 | -1.87509000 |
| H | -2.60404500 | 5.11127200 | -0.55833100 |

|    |             |             |             |
|----|-------------|-------------|-------------|
| C  | -2.43617100 | -1.56321000 | 0.26391700  |
| C  | -3.76919800 | -1.22804200 | 0.50652500  |
| C  | -2.16031700 | -2.70311200 | -0.49120400 |
| C  | -4.80102300 | -2.00723000 | -0.00470500 |
| H  | -4.01129600 | -0.34625900 | 1.08735000  |
| C  | -3.19017200 | -3.48764200 | -0.99900600 |
| H  | -1.13548400 | -2.98622600 | -0.70228800 |
| C  | -4.51389600 | -3.13989200 | -0.75796500 |
| H  | -5.83005200 | -1.72920000 | 0.18650200  |
| H  | -2.95741900 | -4.36583300 | -1.58826300 |
| H  | -5.31693400 | -3.74645600 | -1.15641800 |
| C  | 2.43616700  | -1.56321600 | -0.26391500 |
| C  | 3.76919400  | -1.22803700 | -0.50650500 |
| C  | 2.16031100  | -2.70312800 | 0.49119000  |
| C  | 4.80101800  | -2.00722500 | 0.00472800  |
| H  | 4.01129300  | -0.34624500 | -1.08731600 |
| C  | 3.19016500  | -3.48765800 | 0.99899300  |
| H  | 1.13547700  | -2.98625000 | 0.70225900  |
| C  | 4.51388900  | -3.13989700 | 0.75797100  |
| H  | 5.83004700  | -1.72918600 | -0.18646500 |
| H  | 2.95741000  | -4.36585700 | 1.58823700  |
| H  | 5.31692600  | -3.74646100 | 1.15642600  |
| C  | 1.59236300  | 1.53930700  | -0.56217500 |
| C  | 1.18959200  | 2.65318700  | -1.29758000 |
| C  | 2.36589300  | 1.72812300  | 0.58343800  |
| C  | 1.55168400  | 3.93410100  | -0.89713300 |
| H  | 0.57281700  | 2.52982400  | -2.17941800 |
| C  | 2.73066300  | 3.00867600  | 0.98260300  |
| H  | 2.68510100  | 0.87612000  | 1.16986800  |
| C  | 2.32321000  | 4.11426600  | 0.24370700  |
| H  | 1.22274000  | 4.79018200  | -1.47226500 |
| H  | 3.32941800  | 3.14305300  | 1.87505300  |
| H  | 2.60406100  | 5.11126200  | 0.55833200  |
| Sb | 0.84170800  | -0.39936800 | -1.15584000 |
| Sb | -0.84171000 | -0.39936500 | 1.15583900  |

Cartesian coordinates of the optimized geometry for **S5** at B3LYP-D3BJ/def2-TZVP level of theory:

|    |             |             |             |
|----|-------------|-------------|-------------|
| Sb | 1.19631400  | 0.00001900  | -0.00047000 |
| C  | 1.72950600  | 0.00014800  | 2.07056700  |
| Sb | -1.62044100 | -0.00002900 | -0.45141000 |
| C  | -1.90483600 | 1.60977300  | 0.98528700  |
| C  | 2.19519200  | 1.69620800  | -0.82939300 |
| H  | 3.25841900  | 1.60747600  | -0.61493600 |
| H  | 2.03008300  | 1.71538700  | -1.90411400 |
| H  | 1.79717500  | 2.60085100  | -0.37562400 |
| C  | 2.19488200  | -1.69642300 | -0.82924600 |
| H  | 2.03061200  | -1.71501500 | -1.90410900 |
| H  | 3.25799000  | -1.60842000 | -0.61390900 |
| H  | 1.79596800  | -2.60104000 | -0.37621600 |
| C  | -1.90455800 | -1.60965300 | 0.98555800  |
| H  | -2.97972000 | -1.71188500 | 1.13005200  |
| H  | -1.51548700 | -2.54330600 | 0.58507700  |
| H  | -1.43704400 | -1.37695900 | 1.93926600  |
| H  | -1.51630600 | 2.54351100  | 0.58448000  |
| H  | -2.98000600 | 1.71153900  | 1.13007400  |
| H  | 1.32473700  | -0.89125500 | 2.54376100  |
| H  | 2.81551100  | 0.00036000  | 2.14282000  |
| H  | 1.32439200  | 0.89142400  | 2.54370600  |
| H  | -1.43694800 | 1.37751700  | 1.93891700  |

Cartesian coordinates of the optimized geometry for **S6** at B3LYP-D3BJ/def2-TZVP level of theory:

|    |            |             |             |
|----|------------|-------------|-------------|
| Sb | 1.33966400 | 0.04682800  | -0.48518400 |
| C  | 1.88115500 | -1.71689000 | 0.69081600  |

|    |             |             |             |
|----|-------------|-------------|-------------|
| Sb | -1.33968200 | 0.04681400  | 0.48516600  |
| C  | -1.88080500 | -1.71714500 | -0.69065700 |
| C  | 2.07338800  | 1.47048900  | 1.00381400  |
| H  | 3.16248800  | 1.47033600  | 0.98643900  |
| H  | 1.71545700  | 2.46921900  | 0.75823500  |
| H  | 1.72300600  | 1.19131300  | 1.99569900  |
| C  | -2.07364500 | 1.47026700  | -1.00388400 |
| H  | -3.16275100 | 1.46955400  | -0.98670900 |
| H  | -1.71628500 | 2.46913300  | -0.75801800 |
| H  | -1.72295400 | 1.19149700  | -1.99577400 |
| H  | -1.42662300 | -2.60124700 | -0.24609900 |
| H  | -2.96397200 | -1.83031200 | -0.67714200 |
| H  | 2.96434100  | -1.82985300 | 0.67697200  |
| H  | 1.54008500  | -1.60712800 | 1.71874700  |
| H  | -1.53942400 | -1.60747700 | -1.71849700 |
| H  | 1.42698400  | -2.60113100 | 0.24652700  |

## V. References

1. R. L. Letsinger, J. A. Gilpin and W. J. Vullo, *J. Org. Chem.* 1962, **27**, 672.
2. S. Sasaki, K. Sutoh, F. Murakami and M. Yoshifuji, *J. Am. Chem. Soc.* 2002, **124**, 14830.
3. A. R. O'Connor, C. Nataro, J. A. Golen and A. L. Rheingold, *J. Organomet. Chem.* 2004, **689**, 2411.
4. W. Uhlig, *Z. Naturforsch. B* 1995, **50**, 1674.
5. J. R. Aranzaes, M.-C. Daniel and D. Astruc, *Can. J. Chem.* 2006, **84**, 288.
6. G. M. Sheldrick, *Acta Crystallogr.* 1990, **A46**, 467.
7. G. M. Sheldrick, SHELXL-2017, Program for the Refinement of Crystal Structures University of Göttingen, Göttingen (Germany) 2017. See also: G.M. Sheldrick *Acta Crystallogr.* 2015, **C71**, 3.
8. shelXle, *A Qt GUI for SHELXL*, C. B. Hübschle, G. M. Sheldrick and B. Dittrich, *J. Appl. Cryst.* 2011, **44**, 1281.
9. M. J. Frisch, G. W. Trucks, H. B. Schlegel, G. E. Scuseria, M. A. Robb, J. R. Cheeseman, G. Scalmani, V. Barone, G. A. Petersson, H. Nakatsuji, X. Li, M. Caricato, A. V. Marenich, J. Bloino, B. G. Janesko, R. Gomperts, B. Mennucci, H. P. Hratchian, J. V. Ortiz, A. F. Izmaylov, J. L. Sonnenberg, D. Williams-Young, F. Ding, F. Lipparini, F. Egidi, J. Goings, B. Peng, A. Petrone, T. Henderson, D. Ranasinghe, V. G. Zakrzewski, J. Gao, N. Rega, G. Zheng, W. Liang, M. Hada, M. Ehara, K. Toyota, R. Fukuda, J. Hasegawa, M. Ishida, T. Nakajima, Y. Honda, O. Kitao, H. Nakai, T. Vreven, K. Throssell, J. A. Montgomery, Jr., J. E. Peralta, F. Ogliaro, M. J. Bearpark, J. J. Heyd, E. N. Brothers, K. N. Kudin, V. N. Staroverov, T. A. Keith, R. Kobayashi, J. Normand, K. Raghavachari, A. P. Rendell, J. C. Burant, S. S. Iyengar, J. Tomasi, M. Cossi, J. M. Millam, M. Klene, C. Adamo, R. Cammi, J. W. Ochterski, R. L. Martin, K. Morokuma, O. Farkas, J. B. Foresman and D. J. Fox, Gaussian, Inc., Wallingford CT, 2016.
10. a) G. te Velde, F. M. Bickelhaupt, E. J. Baerends, C. Fonseca Guerra, S. J. A. van Gisbergen, J. G. Snijders, T. Ziegler, *J. Comput. Chem.* 2001, **22**, 931–967. b) ADF 2020.1, SCM, Theoretical Chemistry, Vrije Universiteit, Amsterdam, The Netherlands, <http://www.scm.com>. E.J. Baerends, T. Ziegler, A. J. Atkins, J. Autschbach, O. Baseggio, D. Bashford, A. Bérces, F. M. Bickelhaupt, C. Bo, P. M. Boerrigter, C. Cappelli, L. Cavallo, C. Daul, D. P. Chong, D. V. Chulhai, L. Deng, R. M. Dickson, J.M. Dieterich, F. Egidi, D.E. Ellis, M. van Faassen, L. Fan, T.H. Fischer, A. Förster, C. Fonseca Guerra, M. Franchini, A. Ghysels, A. Giammona, S. J. A. van Gisbergen, A. Goez, A. W. Götz, J. A. Groeneveld, O. V. Gritsenko, M. Grüning, S. Gusarov, F. E. Harris, P. van den Hoek, Z. Hu, C. R. Jacob, H. Jacobsen, L. Jensen, L. Joubert, J. W. Kaminski, G. van Kessel, C. König, F. Kootstra, A. Kovalenko, M. V. Krykunov, P. Lafiosca, E. van Lenthe, D. A. McCormack, M. Medves, A. Michalak, M. Mitoraj, S. M. Morton, J. Neugebauer, V. P. Nicu, L. Noodleman, V. P. Osinga, S. Patchkovskii, M. Pavanello, C. A. Peeples, P. H. T. Philipsen, D. Post, C. C. Pye, H. Ramanantoanina, P. Ramos, W. Ravenek, M. Reimann, J. I. Rodríguez, P. Ros, R. Rüger, P. R. T. Schipper, D. Schlüns, H. van Schoot, G. Schreckenbach, J. S. Seldenthuis, M. Seth, J. G. Snijders, M. Solà, M. Stener, M. Swart, D. Swerhone,

- V. Tognetti, G. te Velde, P. Vernooijs, L. Versluis, L. Visscher, O. Visser, F. Wang, T. A. Wesolowski, E. M. van Wezenbeek, G. Wiesenekker, S. K. Wolff, T. K. Woo and A. L. Yakovlev.
11. AIMAll (Version 19.10.12), T. A. Keith, TK Gristmill Software, Overland Park KS, USA, 2019 (<http://aim.tkgristmill.com>).
  12. a) A. D. Becke, *Phys. Rev. A* 1988, **38**, 3098. b) C. Lee, W. Yang and R. G. Parr, *Phys. Rev. B* 1988, **37**, 785. c) B. Miehlich, A. Savin, H. Stoll and H. Preuss, *Chem. Phys. Lett.* 1989, **157**, 200.
  13. S. Grimme, S. Ehrlich and L. Goerigk, *J. Comp. Chem.* 2011, **32**, 1456.
  14. A. E. Reed, L. A. Curtiss and F. Weinhold, *Chem. Rev.* 1988, **88**, 899.
  15. F. M. Bickelhaupt and E. J. Baerends, *Rev. Comput. Chem.* 2000, **15**, 1.
  16. R. F. W. Bader, *Atoms in Molecules: A Quantum Theory*, Oxford University Press: Oxford, U.K., 1990.
  17. M. A. Blanco, A. Martín Pendás and E. Francisco, *J. Chem. Theory Comput.* 2005, **1**, 1096.
